# Supplementary material for: Association between LKB1 expression and prognosis of patients with solid tumours: an updated systematic review and meta-analysis
Source: PubMed Central journal article supplement — BMJ Open. 2019 Aug 5;9(8):e027185. doi: 10.1136/bmjopen-2018-027185 (PMC6687027; doi:10.1136/bmjopen-2018-027185), 2019-08-05
Supplement: bmjopen-2018-027185.draft_revisions.pdf [file bmjopen-2018-027185.draft_revisions.pdf]

# BMJ Open

BMJ Open is committed to open peer review. As part of this commitment we make the peer review history of every article we publish publicly available.

When an article is published we post the peer reviewers' comments and the authors' responses online. We also post the versions of the paper that were used during peer review. These are the versions that the peer review comments apply to.

The versions of the paper that follow are the versions that were submitted during the peer review process. They are not the versions of record or the final published versions. They should not be cited or distributed as the published version of this manuscript.

BMJ Open is an open access journal and the full, final, typeset and author-corrected version of record of the manuscript is available on our site with no access controls, subscription charges or pay-per-view fees (<http://bmjopen.bmj.com>).

If you have any questions on BMJ Open's open peer review process please email [info.bmjopen@bmj.com](mailto:info.bmjopen@bmj.com)

# BMJ Open

## Association between LKB1 expression and prognosis of patients with solid tumors: an updated systematic review and meta-analysis

|                               |                                                                                                                                                                                                                                                                                                                                                                                                                                                                                                                                                                                                                                                                                                                                                                                                                                                                                                                                                                                                                                                                                                                                                                                                                                                      |
|-------------------------------|------------------------------------------------------------------------------------------------------------------------------------------------------------------------------------------------------------------------------------------------------------------------------------------------------------------------------------------------------------------------------------------------------------------------------------------------------------------------------------------------------------------------------------------------------------------------------------------------------------------------------------------------------------------------------------------------------------------------------------------------------------------------------------------------------------------------------------------------------------------------------------------------------------------------------------------------------------------------------------------------------------------------------------------------------------------------------------------------------------------------------------------------------------------------------------------------------------------------------------------------------|
| Journal:                      | <i>BMJ Open</i>                                                                                                                                                                                                                                                                                                                                                                                                                                                                                                                                                                                                                                                                                                                                                                                                                                                                                                                                                                                                                                                                                                                                                                                                                                      |
| Manuscript ID                 | bmjopen-2018-027185                                                                                                                                                                                                                                                                                                                                                                                                                                                                                                                                                                                                                                                                                                                                                                                                                                                                                                                                                                                                                                                                                                                                                                                                                                  |
| Article Type:                 | Research                                                                                                                                                                                                                                                                                                                                                                                                                                                                                                                                                                                                                                                                                                                                                                                                                                                                                                                                                                                                                                                                                                                                                                                                                                             |
| Date Submitted by the Author: | 15-Oct-2018                                                                                                                                                                                                                                                                                                                                                                                                                                                                                                                                                                                                                                                                                                                                                                                                                                                                                                                                                                                                                                                                                                                                                                                                                                          |
| Complete List of Authors:     | Ren, Yun; Affiliated Tumor Hospital of Guangxi Medical University, Hepatobiliary Surgery Department; Guangxi Medical University<br>Zhao, Feng; Affiliated Tumor Hospital of Guangxi Medical University, Hepatobiliary Surgery Department; Guangxi Medical University<br>Mo, Han; Affiliated Tumor Hospital of Guangxi Medical University, Hepatobiliary Surgery Department<br>Jia, Rong; Affiliated Tumor Hospital of Guangxi Medical University, Hepatobiliary Surgery Department<br>Tang, Juan; Affiliated Tumor Hospital of Guangxi Medical University, Hepatobiliary Surgery Department<br>Zhao, Xin; Affiliated Tumor Hospital of Guangxi Medical University, Hepatobiliary Surgery Department<br>Wei, Jue; Affiliated Tumor Hospital of Guangxi Medical University, Hepatobiliary Surgery Department; Guangxi medical university<br>Huo, Rong; Affiliated Tumor Hospital of Guangxi Medical University, Hepatobiliary Surgery Department<br>Li, Qiu; Affiliated Tumor Hospital of Guangxi Medical University, Hepatobiliary Surgery Department<br>You, Xue; Affiliated Tumor Hospital of Guangxi Medical University, Hepatobiliary Surgery Department; Guangxi Liver Cancer Diagnosis and Treatment Engineering and Technology Research Center |
| Keywords:                     | LKB1, STK11, liver kinase B1, prognosis                                                                                                                                                                                                                                                                                                                                                                                                                                                                                                                                                                                                                                                                                                                                                                                                                                                                                                                                                                                                                                                                                                                                                                                                              |
|                               |                                                                                                                                                                                                                                                                                                                                                                                                                                                                                                                                                                                                                                                                                                                                                                                                                                                                                                                                                                                                                                                                                                                                                                                                                                                      |

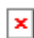

1  
2  
3  
4 **Association between LKB1 expression and prognosis of patients with solid tumors: an**  
5  
6 **updated systematic review and meta-analysis**  
7

8  
9 Yun-Hong Ren<sup>1,3\*</sup>, Feng-Juan Zhao<sup>1,3\*</sup>, Han-Yue Mo<sup>1\*</sup>, Rong-Rong Jia<sup>1</sup>, Juan Tang<sup>1</sup>, Xin-Hua  
10 Zhao<sup>1</sup>, Jue-Ling Wei<sup>1,3</sup>, Rong-Rui Huo<sup>1</sup>, Qiu-Qin Li<sup>1</sup>, Xue-Mei You<sup>1,2</sup>  
11  
12

13  
14 \* These authors contributed equally to this work.  
15  
16

17  
18  
19  
20 **Correspondence:**

21 Xue-Mei You

22  
23  
24  
25 Hepatobiliary Surgery Department, Affiliated Tumor Hospital of Guangxi Medical University,  
26 He Di Rd #71, Nanning 530021, People's Republic of China  
27

28  
29  
30 Email: You\_XueMei77@163.com (X.-M.Y)  
31

32  
33 Telephone: +86 771 533 0855  
34

35  
36 Fax: +86 771 531 2000  
37  
38  
39  
40  
41

42 **Abstract**  
43  
44

45 **Objectives.** Liver kinase B1 (LKB1) is considered a tumor suppressor that can control cell  
46 growth and metabolism. Whether LKB1 expression levels are related to clinicopathology and  
47 prognosis is controversial. This review aimed to quantitatively examine the latest evidence on  
48 this question.  
49  
50  
51  
52  
53  
54  
55  
56  
57  
58  
59  
60

1  
2  
3  
4 **Methods.** Eligible studies were identified through a literature search up to June 15, 2018 in the  
5  
6 following databases: Embase, PubMed, Web of Science, China National Knowledge  
7  
8 Infrastructure and Wan Fang. Relevant data were meta-analyzed for overall survival (OS),  
9  
10 disease-free survival (DFS), recurrence-free survival (RFS) and various clinical parameters.  
11  
12  
13

14  
15 **Results.** The systematic review included 25 studies containing 6,012 patients with solid tumors.  
16  
17 Compared to patients with high LKB1 expression, patients with low expression showed  
18  
19 significantly shorter OS in univariate analysis (HR1.61, 95%CI 1.36-1.92, P<0.01) and  
20  
21 multivariate analysis (HR1.61, 95%CI 1.26-2.06, P<0.01). In contrast, the two groups showed  
22  
23 similar DFS in univariate analysis (HR1.49, 95%CI 0.73-3.01, P=0.27) as well as similar RFS in  
24  
25 univariate analysis (HR1.44, 95%CI 0.65-3.17, P=0.37) and multivariate analysis (HR1.02,  
26  
27 95%CI 0.42-2.47, P=0.97). Patients with low LKB1 expression showed significantly worse  
28  
29 tumor differentiation (OR1.71, 95%CI 1.14-2.55, P<0.01), larger tumors (OR1.68, 95%CI  
30  
31 1.24-2.27, P<0.01), earlier lymph node metastasis (OR 1.43, 95%CI 1.26-1.62, P<0.01) and  
32  
33 more advanced TNM stage (OR 1.80, 95%CI 1.56-2.07, P<0.01).  
34  
35  
36  
37  
38  
39  
40  
41

42 **Conclusion.** Low LKB1 expression predicts shorter OS, worse tumor differentiation, larger  
43  
44 tumors, earlier lymph node metastasis and more advanced TNM stage. Low LKB1 expression  
45  
46 may be a useful biomarker of poor clinicopathology and prognosis.  
47  
48  
49

50 **Strengths and limitations of this study.** (1) Meta-analysis of 25 studies involving 6,012 patients  
51  
52 in six countries found the evidence of a relationship between LKB1 expression and solid tumor  
53  
54 prognosis and clinicopathology.  
55  
56  
57

1  
2  
3  
4 (2) Subgroup analysis was performed after stratifying the results based on multivariate analysis,  
5  
6 type of LKB1 assay, country, cancer type, and intracellular location of LKB1 staining that was  
7  
8 examined.  
9

10  
11  
12 (3) Results interpretation should pay attention to the study of high heterogeneity.  
13  
14  
15  
16  
17  
18  
19  
20  
21  
22  
23  
24  
25  
26  
27  
28  
29  
30  
31  
32  
33  
34  
35  
36  
37  
38  
39  
40  
41  
42  
43  
44  
45  
46  
47  
48  
49  
50  
51  
52  
53  
54  
55  
56  
57  
58  
59  
60

For peer review only

## Introduction

The serine/threonine kinase liver kinase B1 (LKB1), also known as STK11, was originally observed to be mutated in the genes of patients with Peutz-Jeghers syndrome[1]. LKB1 is often mutated in lung, breast, gastric and other cancers [2-4]. LKB1 plays roles in multiple cellular processes, including cell structure control, cell cycle regulation, apoptosis and cellular metabolism[5-7]. LKB1 phosphorylates multiple substrates, including AMPK, to act as a tumor suppressor to restrict tumorigenesis and metastasis[8]. Mice with a Treg-specific deletion of LKB1 develop a fatal inflammatory disease, and LKB1 in Treg cells acts not through signalling by AMPK or the mammalian target of rapamycin complex1 (mTORC1) and Hif-1, but through signalling involving pd-1 and TNF receptor proteins[9]. LKB1 deficiency can render tumor cells sensitive to metabolic stress, which may turn out to be an anti-tumor strategy[10].

Although several studies have examined the role of LKB1 in tumor inhibition, its role in the prognosis of solid tumors has not been conclusively determined. Several studies suggest that decreased LKB1 expression indicates poor prognosis. In fact, meta-analysis showed that decreased LKB1 expression in patients with solid tumors may be related to poor prognosis and serve as a predictor of clinicopathological prognostic factors[11]. However, other studies have not reproduced these findings, and some have even suggested that decreased LKB1 may correlate with favorable survival.

1  
2  
3  
4 Therefore we systematically reviewed and meta-analyzed the relevant literature to understand the  
5  
6 current evidence about a relationship between LKB1 expression and prognosis in patients with  
7  
8 solid tumors.  
9  
10

## 11 12 13 14 15 16 **Materials and Methods**

### 17 18 19 *Literature search strategy*

20  
21  
22 The following databases were searched through June 15, 2018 to identify studies of LKB1  
23  
24 expression and survival in solid tumors: PubMed, Embase, Web of Science, the Chinese National  
25  
26 Knowledge Infrastructure, and Wang Fang. Searches were carried out using terms such as LKB1,  
27  
28 STK11, liver kinase B1, prognosis, prognostic, survival, and overall survival. For example, we  
29  
30 searched PubMed using the following strategy: (LKB1[tw] OR STK11[tw] OR "liver kinase  
31  
32 B1"[tw] OR "serine-threonine kinase 11"[tw]) AND ("prognosis"[MeSH Terms] OR  
33  
34 prognoses[tw] OR prognostic[tw] OR "prognostic factor"[tw] OR "prognostic factors"[tw] OR  
35  
36 factor[tw] OR factors[tw] OR outcome[tw] OR survival[tw] OR metastases[tw] OR  
37  
38 metastasis[tw] OR migration[tw] OR transplantation[tw] OR transfer[tw] OR shift[tw] OR  
39  
40 divert[tw] OR recurrence[tw] OR relapse[tw] OR reappear[tw] OR recur[tw] OR  
41  
42 recidivation[tw] OR invasion[tw]).  
43  
44  
45  
46  
47  
48  
49  
50

### 51 52 53 54 55 56 *Study inclusion and exclusion criteria*

1  
2  
3  
4 Studies were considered eligible if they met the following criteria:(1) LKB1 expression in cancer  
5  
6 tissue (obtained via surgery or biopsy) was measured by immunohistochemistry or Western  
7  
8 blotting; (2)the association was studied between LKB1 expression and clinicopathological  
9  
10 characteristics, overall survival (OS), disease-free survival (DFS), or recurrence-free survival  
11  
12 (RFS) of patients with solid tumors; (3)sufficient data were published for calculating an odds  
13  
14 ratio (OR) or hazard ratio (HR) and 95% confidence interval (CI); and (4) the study was  
15  
16 published as a full-text article in English or Chinese. If we retrieved multiple studies conducted  
17  
18 by the same research group and involving overlapping patient populations, only the most recent  
19  
20 or most complete study was included in the meta-analysis. Articles were excluded if they (1)  
21  
22 were duplicate publications; (2) were case reports, reviews, letters or animal studies; or (3) did  
23  
24 not report survival outcomes.  
25  
26  
27  
28  
29  
30  
31  
32  
33  
34  
35  
36

### 37 *Study quality assessment*

38  
39  
40 Two reviewers independently assessed the quality of included studies using the standard  
41  
42 Newcastle–Ottawa scale (NOS) from 0 to 9. NOS scores of 9-7 were defined as high quality, 6-4  
43  
44 as intermediate quality, and 3-1 as low quality.  
45  
46  
47  
48  
49  
50  
51

### 52 *Data extraction*

53  
54  
55 Two researchers (YHR and FJZ) independently screened all titles and abstracts identified in the  
56  
57  
58  
59  
60



1  
2  
3  
4 initial search. Articles remaining after this screen were read in full and assessed for eligibility.  
5  
6 The following types of data were extracted: (1) name of first author, publication year, country,  
7  
8 type of cancer and number of patients; (2) patient age, gender, follow-up time, type of LKB1  
9  
10 assay, intracellular location where LKB1 staining was examined, LKB1 cut-off value for  
11  
12 classifying expression as high or low, survival data (OS, DFS, RFS), statistical method used to  
13  
14 analyze survival data; (3) tumor differentiation, tumor size, lymph node metastasis and TNM  
15  
16 stage. All data were cross-checked by two researchers, and disagreements were resolved by a  
17  
18 third reviewer (JHZ). If study information was incomplete or unclear, we contacted the  
19  
20 corresponding author in an attempt to collect accurate information.  
21  
22  
23  
24  
25  
26  
27  
28  
29  
30

### 31 *Statistical analysis*

32  
33  
34  
35 Correlation between LKB1 expression and OS of patients with solid tumors was evaluated in  
36  
37 terms of HR and 95%CI. If a study showed Kaplan-Meier survival curves but not HRs with  
38  
39 95%CI, data were extracted from survival curves using Engauge Digitizer 4.1  
40  
41 ([sourceforge.net/projects/digitizer](http://sourceforge.net/projects/digitizer)) and the Tierney table  
42  
43 ([www.biomedcentral.com/content/supplementary/1745-6215-8-16S1.xls](http://www.biomedcentral.com/content/supplementary/1745-6215-8-16S1.xls)).Correlation  
44  
45  
46  
47  
48  
49 between LKB1 expression and clinicopathological characteristics of patients with solid tumors  
50  
51 was evaluated in terms of OR and 95%CI.  
52  
53  
54  
55  
56  
57  
58  
59  
60

1  
2  
3  
4 HRs and ORs were meta-analyzed using the random-effects model in Review Manager 5.3  
5  
6 (Cochrane Collaboration, Copenhagen, Denmark). P values were two-sided and values <0.05  
7  
8 were considered statistically significant.  
9  
10

11  
12  
13  
14  
15  
16  $I^2$  was used to assess statistical heterogeneity. If  $I^2 > 50\%$ , heterogeneity was considered to exist  
17  
18 among all included studies, and we conducted a subgroup analysis to investigate its possible  
19  
20 source. If  $I^2 < 50\%$ , heterogeneity among all included studies was regarded as insignificant, and  
21  
22 data were directly pooled.  
23  
24  
25  
26  
27  
28  
29

30  
31 To assess the stability of our meta-analysis results, we conducted a sensitivity analysis by  
32  
33 excluding individual studies one at a time and recalculating the pooled HR or P value for the  
34  
35 remaining studies. Potential for publication bias was assessed by examining funnel plots of  
36  
37 survival data.  
38  
39  
40  
41  
42  
43  
44

## 45 **Results**

46  
47  
48 A total of 4,838 potentially relevant studies were identified in literature searches, of which 3,374  
49  
50 were excluded as duplicate publications. After screening titles and abstracts, 50 studies were read  
51  
52 in full, leading to 25 that were included in the meta-analysis [12-36] (Fig.1). Data from all 25  
53  
54  
55  
56  
57  
58  
59  
60

1  
2  
3  
4 studies were meta-analyzed to examine the potential correlation of LKB1 expression with  
5  
6 clinicopathological characteristics. Data from 24 studies were meta-analyzed to examine the  
7  
8 potential correlation between LKB1 expression and OS. Data from only one study were used to  
9  
10 analyze the potential correlation between LKB1 expression and RFS.  
11  
12  
13  
14  
15  
16  
17

### 18 *Description of studies*

19  
20  
21  
22 The 25 studies in the systematic review involved 6,012 patients from six countries: China, USA,  
23  
24 France, UK, Canada, and Egypt. Data on OS were reported in 24 studies, data on RFS in five  
25  
26 studies, and data on DFS in four studies. Patients covered a range of cancers, including cancers  
27  
28 of the lung, breast, prostate or pancreas; gastric cancer; hepatocellular carcinoma; esophagus  
29  
30 squamous cancer; colorectal cancer; glioma; and laryngeal squamous cell carcinoma. Tables 1-2  
31  
32 summarize the characteristics of the included studies. Table 3 lists clinicopathological  
33  
34 characteristics and LKB1 expression. Eight studies had an NOS score of 8; 11 studies, 7; 6  
35  
36 studies, 6; and 3 studies, 5 (Table 1).  
37  
38  
39  
40  
41  
42  
43  
44  
45  
46

47 Of the 25 studies, 16 reported HRs from multivariate analysis, which we used directly. For the  
48  
49 nine remaining studies, we estimated HRs for OS, DFS, and RFS from survival curves and  
50  
51 Tierney's table.  
52  
53  
54  
55  
56  
57  
58  
59  
60

### *Association between LKB1 expression and OS*

Given heterogeneity among the studies ( $I^2=76.0\%$ ,  $P<0.001$ ), a random-effects model was used to meta-analyze the data. The pooled HR describing OS for patients with low LKB1 expression relative to OS for patients with high expression is shown in Fig.2A. Decreased LKB1 expression was significantly associated with OS: low expression was associated with significantly higher risk of poor survival (HR1.61, 95%CI 1.36-1.92,  $P<0.01$ ).

To assess the predictive role of decreased LKB1, subgroup analysis was performed after stratifying the results based on multivariate analysis, type of LKB1 assay, country, cancer type, and intracellular location of LKB1 staining that was examined. Subgroup analysis based on multivariate analysis showed that decreased LKB1 expression was related to poor OS (HR 1.61, 95%CI 1.26–2.06,  $P <0.001$ ; Fig.2B). This relationship was observed for the following cancer types: lung cancer (HR 2.07, 95%CI 1.60-2.69,  $P<0.01$ ), pancreatic cancer (HR 2.16, 95%CI 1.53-3.05,  $P<0.001$ ), gastric cancer (HR 2.19, 95%CI 1.60-3.01,  $P<0.01$ ), and breast cancer (HR1.26, 95%CI 1.15-1.37,  $P<0.01$ ). However, this relationship was not observed in the case of hepatocellular carcinoma (HR1.27, 95%CI 0.84-1.94,  $P=0.26$ ).

Among Asian patients, decreased LKB1 expression was associated with significantly shorter OS (HR1.71, 95%CI 1.42-2.07,  $P<0.01$ ); this relationship was not observed among non-Asian

1  
2  
3  
4 patients (HR1.15, 95%CI 0.63-2.08, P=0.65).  
5  
6  
7  
8  
9

10 Pooled HR for the subgroup of patients tested by anti-LKB1 immunohistochemistry was 1.58  
11 (95%CI 1.33–1.89, P<0.01). Low LKB1 expression based on cytoplasmic staining predicted  
12 significant adverse prognosis (HR1.78, 95%CI 1.49-2.13, P<0.01). This relationship was not  
13 observed when the judgment of low LKB1 expression was based on nuclear staining (HR1.25,  
14 95%CI 0.85-1.85, P=0.26).  
15  
16  
17  
18  
19  
20  
21  
22  
23  
24  
25  
26  
27

28 Details of the subgroup analysis are listed in Table 4. The results of the sensitivity analysis  
29 showed that the exclusion of each single study did not alter the results significantly (data not  
30 shown). These results suggest that our meta-analysis gave credible results.  
31  
32  
33  
34  
35  
36  
37  
38  
39

#### 40 *Association of LKB1 expression with DFS and RFS*

41  
42

43 Studies showed significant heterogeneity, so data were meta-analyzed using a random-effect  
44 model. Low LKB1 expression did not show a significant association with RFS based on  
45 univariate analysis (HR 1.44, 95%CI 0.65-3.17, P=0.37) or multivariate analysis (HR 1.02,  
46 95%CI 0.42-2.47, P=0.97; Fig.2C). Similarly, no significant correlation was observed between  
47 LKB1 expression and DFS based on univariate analysis and random-effect meta-analysis (HR  
48  
49  
50  
51  
52  
53  
54  
55  
56  
57  
58  
59  
60

1  
2  
3  
4 1.49, 95%CI 0.73-3.01, P=0.27; Fig. 2D).  
5  
6  
7  
8  
9

### 10 *Association between LKB1 expression and clinicopathological characteristics*

11  
12  
13  
14 Meta-analysis of the relationship between LKB1 expression and clinicopathological  
15 characteristics (Fig.3) failed to show a significant association of decreased LKB1 expression  
16 with age (OR 0.78, 95%CI 0.57-1.05, P=0.10) or sex (OR 0.97, 95%CI 0.78-1.19, P=0.76). In  
17 contrast, low LKB1 expression was significantly related to worse differentiation (OR 1.17,  
18 95%CI 1.14-2.55, P<0.01), deeper invasion (OR 1.68, 95%CI 1.24-2.27, P<0.01), earlier lymph  
19 node metastasis (OR 1.43, 95%CI 1.26-1.62, P<0.01), and more advanced clinical stage (OR  
20 1.80, 95%CI 1.56-2.07, P<0.01).  
21  
22  
23  
24  
25  
26  
27  
28  
29  
30  
31  
32

33 Results are shown as individual and pooled OR with 95% confidence intervals  
34  
35

### 36 *Publication bias*

37  
38  
39  
40 Funnel plots of OS appeared asymmetric (Fig.4), suggesting the possibility of publication bias  
41 among the included studies.  
42  
43  
44  
45  
46  
47  
48  
49

## 50 **Discussion**

51  
52  
53 This meta-analysis suggests that among patients with many kinds of solid tumors, low LKB1  
54 expression is associated with worse OS, whereas LKB1 expression does not appear to  
55  
56  
57  
58  
59  
60

1  
2  
3  
4 significantly influence DFS or RFS. This suggests that low LKB1 expression may be a predictor  
5  
6 of unfavorable prognosis. In fact, the available evidence suggests an association of low LKB1  
7  
8 expression with worse tumor differentiation, deeper invasion, more advanced clinical stage, and  
9  
10 earlier metastasis to lymph nodes and other organs. These findings are consistent with previous  
11  
12 conclusions [11], and they were confirmed in our data set using sensitivity analysis.  
13  
14  
15  
16  
17  
18  
19  
20

21 Some potentially interesting findings emerged from subgroup analyses conducted after  
22  
23 stratifying the data according to various criteria. Our meta-analysis linked low LKB1 expression  
24  
25 with poor prognosis in Asians but not in non-Asians, which may reflect genetic and  
26  
27 environmental differences. While low LKB1 expression was associated with worse prognosis in  
28  
29 patients with certain types of cancer (lung, gastric, pancreatic, breast), this was not the case in  
30  
31 patients with hepatocellular carcinoma. This difference may relate to different co-morbidities  
32  
33 associated with the types of cancer. Lung cancer, stomach cancer, breast cancer, and pancreatic  
34  
35 cancer have high incidence rates around the world, and more studies have been done. The  
36  
37 association between low expression of LKB1 and poor prognosis was observed when low  
38  
39 expression was based on cytoplasmic staining, but not when it was based on nuclear staining.  
40  
41  
42 The reason may be that the regulation of mTORC1 by LKB1 and AMPK occurs on the exterior  
43  
44 of RAB7/LAMP1-positive lysosomal membranes [37]. In this regulation, LKB1 phosphorylates  
45  
46 and activates cell energy-sensing AMPK, which in turn negatively affects TORC1, which is  
47  
48 important for controlling energy metabolism, cell survival and cell growth under conditions of  
49  
50  
51  
52  
53  
54  
55  
56  
57  
58  
59  
60

1  
2  
3  
4 metabolic stress, such as nutrient deficiency. Further studies are needed to elucidate the  
5  
6 mechanism of action of LKB1.  
7  
8  
9

10 Our meta-analysis suggests that at least in many types of solid tumors, LKB1 acts as a tumor  
11  
12 suppressor. This is consistent with several studies in the literature. For example, a decrease in  
13  
14 LKB1 expression as a result of HBx-mediated p53 inactivation may be responsible for colony  
15  
16 formation and invasiveness in hepatocellular carcinoma [41]. LKB1 deficiency in some tumors  
17  
18 may be associated with up-regulation of glutamate  
19  
20 dehydrogenase 1, which activates CamKK2 and its downstream effector AMPK to increase  
21  
22 metastatic potential [42]. LKB1 loss may drive ovarian serous tumorigenesis by disrupting  
23  
24 apical-basal polarity in the presence of mutated p53 in fallopian tube cells [39]. On the one hand,  
25  
26 several studies have suggested an oncogenic role for LKB1 and AMPK under certain  
27  
28 conditions [38], such as when class III phosphatidylinositol-3-OH kinase is inactivated [40].  
29  
30 Further work is needed to clarify under what conditions LKB1 acts as a tumorigenic or  
31  
32 tumor-suppressing molecule.  
33  
34  
35  
36  
37  
38  
39  
40  
41  
42  
43  
44  
45

46 The results of our meta-analysis should be interpreted with caution given several limitations.  
47  
48 First, we had to assess OS, DFS and/or RFS from Kaplan-Meier survival curves in several  
49  
50 studies, such that HRs and 95% CIs were estimated indirectly. Second, studies showed substantial  
51  
52 heterogeneity for outcomes, although we did attempt to minimize the effects of such  
53  
54  
55  
56  
57  
58  
59  
60



1  
2  
3  
4 heterogeneity by using a random-effect meta-analysis model, performing subgroup analyses and  
5  
6 checking results through sensitivity analysis. Third, there is no consensus on LKB1 cut-off  
7  
8 values for defining expression as low or high, which may influence conclusions about  
9  
10 correlations and their clinical significance. Fourth, the funnel plots suggest the potential for  
11  
12 publication bias. This may reflect the generally observed bias toward publication of positive  
13  
14 findings. Fifth, our meta-analysis did not account for numerous other factors that may also affect  
15  
16 prognosis, such as co-morbidities and treatment history. In most cases, this information was not  
17  
18 reported in the included studies.  
19  
20  
21  
22  
23  
24

25 Our results justify the design of rigorous *in vitro* and animal studies designed to explore how  
26  
27 LKB1 influences the prognosis of various types of solid cancers. Ultimately this work should be  
28  
29 extended through human studies, preferentially randomized controlled trials.  
30  
31  
32  
33  
34  
35  
36  
37

## 38 **Conclusions**

39  
40  
41 The available evidence links low LKB1 expression with poor prognosis in patients with various  
42  
43 types of solid tumors. This suggests that LKB1 may be a biomarker for various cancers. These  
44  
45 findings should be verified and extended in human studies, and the mechanisms underlying the  
46  
47 association of LKB1 expression and prognosis should be explored.  
48  
49  
50  
51  
52  
53  
54

## 55 **Author affiliations**

- 1
- 2
- 3
- 4 1. Hepatobiliary Surgery Department, Affiliated Tumor Hospital of Guangxi Medical
- 5 University, Nanning, China
- 6
- 7 2. Guangxi Liver Cancer Diagnosis and Treatment Engineering and Technology Research
- 8 Center, Nanning, China
- 9
- 10
- 11 3. Guangxi medical university, Nanning, China
- 12

13 **Contributors** YXM and MHY designed the study. ZFJ, MHY and JRR conduct  
14 systematic search, search literature and extract data. RYH analyzed the data. RYH and ZFJ wrote  
15 the first draft of the article. TJ, ZXH, WJL and HRR contributed significant knowledge content  
16 and critical expertise and revisions to the manuscript.  
17  
18  
19  
20  
21

22 **Funding** This work was supported by the Graduate Course Construction Project of Guangxi  
23 Medical University (YJSA2017014), the Foundation Ability Enhancement Project for Young  
24 Teachers in Guangxi Universities (2018KY0122, 2017KY0098), the Guangxi Natural Science  
25 Foundation (2018GXNSFBA138018), the Research and Development Program of Guangxi  
26 science and technology department(AB18126042), the Research and Development of  
27 Appropriate Medical and Health Technology Project in Guangxi (S201417-03), and Guangxi  
28 Health and Family Planning Commission Chinese Medicine Science and Technology Special  
29 Subject (GZLC16-36).  
30  
31  
32  
33  
34  
35  
36  
37

38 **Competing interests** The authors have declared that no competing interests exist.  
39  
40

41 **Patient consent** Not required  
42  
43

44 **Provenance and peer review** Not commissioned; externally peer reviewed  
45  
46  
47

48 **Data sharing statement** No additional data are available.  
49  
50  
51  
52  
53  
54  
55  
56  
57  
58  
59  
60

## References

1. Hemminki A. *The molecular basis and clinical aspects of Peutz-Jeghers syndrome*. Cell Mol Life Sci, 1999. 55(5): p. 735-50.
2. Ji H, Ramsey MR, et al. *LKB1 modulates lung cancer differentiation and metastasis*. Nature, 2007. 448(7155): p. 807-10.
3. Zhuang ZG, Di GH, et al. *Enhanced expression of LKB1 in breast cancer cells attenuates angiogenesis, invasion, and metastatic potential*. Mol Cancer Res, 2006. 4(11): p. 843-9.
4. Takahashi M, Sakayori M, et al. *A novel germline mutation of the LKB1 gene in a patient with Peutz-Jeghers syndrome with early-onset gastric cancer*. Journal of Gastroenterology, 2004. 39(12): p. 1210-1214.
5. Amin N, Khan A, et al. *LKB1 regulates polarity remodeling and adherens junction formation in the Drosophila eye*. Proceedings of the National Academy of Sciences, 2009. 106(22): p. 8941-8946.
6. Granot Z, Swisa A, et al. *LKB1 Regulates Pancreatic  $\beta$  Cell Size, Polarity, and Function*. Cell Metabolism, 2009. 10(4): p. 296-308.
7. Lars Kullmann, Krahn MP. *Controlling the master—upstream regulation of the tumor suppressor LKB1*. Oncogene, 2018.
8. Shackelford DB, Shaw RJ. *The LKB1-AMPK pathway: metabolism and growth control in tumour suppression*. Nat Rev Cancer, 2009. 9(8): p. 563-75.
9. Yang K, Blanco DB, et al. *Homeostatic control of metabolic and functional fitness of Treg cells by LKB1 signalling*. Nature, 2017. 548(7669): p. 602-606.
10. Parker SJ, Sevansson RU, et al. *LKB1 promotes metabolic flexibility in response to energy stress*. Metab Eng, 2017. 43(Pt B): p. 208-217.
11. Xiao J, Zou Y, et al. *The Prognostic Value of Decreased LKB1 in Solid Tumors: A Meta-Analysis*. PLoS One, 2016. 11(4): p. e0152674.
12. Ding XM, Li ZP, et al. *Expression and clinical significance of LKB1 protein in lung adenocarcinoma tissues*. Chin J Cancer Prev T Rea T 2005.12(17), 2005: p. 1281-1284.

13. Tsai LH, Chen PM, et al. *LKB1 loss by alteration of the NKX2-1/p53 pathway promotes tumor malignancy and predicts poor survival and relapse in lung adenocarcinomas.* Oncogene, 2014. 33(29): p. 3851-60.
14. Jiang LL, Liang X, et al. *Reduced expression of liver kinase B1 and Beclin1 is associated with the poor survival of patients with non-small cell lung cancer.* Oncology Reports, 2014: p. 1931-1938.
15. Calles A, Sholl LM, et al. *Immunohistochemical Loss of LKB1 Is a Biomarker for More Aggressive Biology in KRAS-Mutant Lung Adenocarcinoma.* Clin Cancer Res, 2015. 21(12): p. 2851-60.
16. Shen Z, Wen XF, et al. *The Tumor Suppressor Gene LKB1 Is Associated with Prognosis in Human Breast Carcinoma.* Clin Cancer Res, 2002(8): p. 2085-2090.
17. Bouchekioua-Bouzaghrou K, Poulard C, et al. *LKB1 when associated with methylated ERalpha is a marker of bad prognosis in breast cancer.* Int J Cancer, 2014.
18. Chen IC, Chang YC, et al. *Clinical Relevance of Liver Kinase B1(LKB1) Protein and Gene Expression in Breast Cancer.* Sci Rep, 2016. 6: p. 21374.
19. Azim HA, Kassem L, et al. *Analysis of PI3K/mTOR Pathway Biomarkers and Their Prognostic Value in Women with Hormone Receptor-Positive, HER2-Negative Early Breast Cancer.* Translational Oncology, 2016. 9(2): p. 114-123.
20. Morton JP, Jamieson NB, et al. *LKB1 haploinsufficiency cooperates with Kras to promote pancreatic cancer through suppression of p21-dependent growth arrest.* Gastroenterology, 2010. 139(2): p. 586-97, 597 e1-6.
21. Yang JY, Jiang SH, et al. *Decreased LKB1 predicts poor prognosis in Pancreatic Ductal Adenocarcinoma.* Sci Rep, 2015. 5: p. 10575.
22. Yang XW, Lin T, et al. *Expression of LKB1 protein in gastric cancer tissue and its clinical significance.* Chin Arch Gen Surg, 2012. 6: p. 51-56.
23. Li DZ, Zhou Y, et al. *Decreased expression of LKB1 predicts poor prognosis in pancreatic neuroendocrine tumor patients undergoing curative resection.* Onco Targets Ther, 2018. 11: p. 1259-1265.
24. Huang Y, Xia L, et al. *Expression of LKB1 and vascular endothelial growth factor in*

- gastric cancer tissue and its clinical significance. *Pract Geriatr*, 2014. 28(9): p. 734-737.
25. Ma LG, Bian SB, et al. *LKB1 inhibits the proliferation of gastric cancer cells by suppressing the nuclear translocation of Yap and beta-catenin*. *Int J Mol Med*, 2016. 37(4): p. 1039-48.
  26. Yin M, Zhang W. et al. *Expression and clinical significance of LKB1 and ZEB1 in gastric cancer tissues*. *Guizhou Medical Journal*, 2017. 41(10): p. 1021-1024.
  27. Huang YH, Chen ZK, et al. *Decreased Expression of LKB1 Correlates with Poor Prognosis in Hepatocellular Carcinoma Patients Undergoing Hepatectomy*. *Asian Pacific Journal of Cancer Prevention*, 2013. 14(3): p. 1985-1988.
  28. Lee SW, Li CF, et al. *Skp2-dependent ubiquitination and activation of LKB1 is essential for cancer cell survival under energy stress*. *Mol Cell*, 2015. 57(6): p. 1022-33.
  29. Wu CC, Wu DW, et al. *Hepatitis B virus X protein represses LKB1 expression to promote tumor progression and poor postoperative outcome in hepatocellular carcinoma*. *Surgery*, 2018.
  30. Wang JH, Zhang K, et al. *Underexpression of LKB1 tumor suppressor is associated with enhanced Wnt signaling and malignant characteristics of human intrahepatic cholangiocarcinoma*. *Oncotarget*, 2015. 6(22): p. 18906-18920.
  31. Ma JJ, Du YM, et al. *Expression and significance of LKB1 protein in esophageal squamous cell carcinoma*. *Medicine and Philosophy*, 2014. 35(495): p. 65-68.
  32. He TY, Tsai LH, et al. *LKB1 loss at transcriptional level promotes tumor malignancy and poor patient outcomes in colorectal cancer*. *Ann Surg Oncol*, 2014. 21 Suppl 4: p. S703-10.
  33. Lu J, Sun P, et al. *Low LKB1 Expression Results in Unfavorable Prognosis in Prostate Cancer Patients*. *Medical Science Monitor*, 2015. 21: p. 3722-3727.
  34. Huang J, Chen HW, et al. *Downregulation of LKB1 promotes tumor progression and predicts unfavorable prognosis in patients with glioma*. *Oncol Lett*, 2017. 13(3): p. 1688-1694.
  35. He SS, Chen Y, et al. *Loss of LKB1 Expression Decreases the Survival and Promotes Laryngeal Cancer Metastasis*. *J Cancer*, 2017. 8(17): p. 3548-3554.

- 1  
2  
3  
4 36. Sun J, Liang BX, et al. *Decreased Expression of Tumor-suppressor Gene LKB1 Correlates with Poor Prognosis in Human Gastric Cancer*. *Anticancer Research*, 2016. 36: p. 869-876.  
5  
6  
7  
8  
9 37. Zhang CS, Jiang B, et al. *The lysosomal v-ATPase-Ragulator complex is a common activator for AMPK and mTORC1, acting as a switch between catabolism and anabolism*. *Cell Metab*, 2014. **20**(3): p. 526-40.  
10  
11  
12  
13  
14 38. Hardie DG, Alessi DR. *LKB1 and AMPK and the cancer-metabolism link - ten years after*. *BMC Biol*, 2013. 11: p. 36.  
15  
16  
17  
18 39. George SH, Milea A, et al. *Loss of LKB1 and p53 synergizes to alter fallopian tube epithelial phenotype and high-grade serous tumorigenesis*. *Oncogene*, 2016. 35(1): p. 59-68.  
19  
20  
21  
22  
23 40. O'Farrell F, Lobert VH, et al. *Class III phosphatidylinositol-3-OH kinase controls epithelial integrity through endosomal LKB1 regulation*. *Nat Cell Biol*, 2017. 19(12): p. 1412-1423.  
24  
25  
26  
27  
28 41. Wu CC, Wu DW, et al. *Hepatitis B virus X protein represses LKB1 expression to promote tumor progression and poor postoperative outcome in hepatocellular carcinoma*. *Surgery*, 2018. 163(5): p. 1040-1046.  
29  
30  
31  
32  
33 42. Jin L, Chun J, et al. *The PLAG1-GDHI Axis Promotes Anoikis Resistance and Tumor Metastasis through CamKK2-AMPK Signaling in LKB1-Deficient Lung Cancer*. *Molecular Cell*, 2018. 69(1): p. 87-99.e7.  
34  
35  
36  
37  
38  
39  
40  
41  
42  
43  
44  
45  
46  
47  
48  
49  
50  
51  
52  
53  
54  
55  
56  
57  
58  
59  
60

1  
2  
3  
4  
5  
6  
7  
8  
9  
10  
11  
12  
13  
14  
15  
16  
17  
18  
19  
20  
21  
22  
23  
24  
25  
26  
27  
28  
29  
30  
31  
32  
33  
34  
35  
36  
37  
38  
39  
40  
41  
42  
43  
44  
45  
46  
47  
48  
49  
50  
51  
52  
53  
54  
55  
56  
57  
58  
59  
60

For peer review only

**Table 1.** Main characteristics of included studies and Newcastle-Ottawa scale scores.

| Study                        | Year | Country | Type of cancer                | No. cases   |              | Age in yr,<br>median(range) | Follow-up,<br>mo. | NOS<br>score |
|------------------------------|------|---------|-------------------------------|-------------|--------------|-----------------------------|-------------------|--------------|
|                              |      |         |                               | Low<br>LKB1 | High<br>LKB1 |                             |                   |              |
| Ding XM                      | 2005 | China   | Lung<br>adenocarcinoma        | 24          | 38           | 60.5(32-77)                 | 80                | 7            |
| Tsai LH                      | 2013 | China   | Lung<br>adenocarcinomas       | 44          | 71           | NR                          | 140               | 7            |
| Jiang LL                     | 2014 | China   | Non-small cell<br>lung cancer | 33          | 109          | 58.2(31-84)                 | 71                | 7            |
| Calles A                     | 2015 | USA     | Lung<br>adenocarcinoma        | 42          | 84           | 63.5(30-84)                 | 60                | 7            |
| Shen Z                       | 2002 | China   | Breast carcinoma              | 38          | 83           | 53.7(32-77)                 | 70                | 6            |
| Bouchekioua-<br>Bouzaghrou K | 2014 | France  | Breast cancer                 | 94          | 60           | 56.87(27-87)                | 162               | 7            |
| Bouchekioua-<br>Bouzaghrou K | 2014 | France  | Breast cancer                 | 102         | 52           | 56.5 (27-87)                | 162               |              |
| Chen IC                      | 2016 | China   | Breast cancer                 | 161         | 408          | 48                          | 120               | 6            |
| Chen IC                      | 2016 | China   | Breast cancer                 | 88          | 189          | 54                          | 120               |              |
| Chen IC                      | 2016 | UK and  | Breast cancer                 | 494         | 494          | 61.3                        | 300               | 5            |



|                 |      |                  |                                       |     |     |             |  |      |   |
|-----------------|------|------------------|---------------------------------------|-----|-----|-------------|--|------|---|
|                 |      |                  | Canada                                |     |     |             |  |      |   |
| Chen IC         | 2016 | UK and<br>Canada | Breast cancer                         | 488 | 487 | 62.6        |  | 300  |   |
| HamdyA.Azi<br>m | 2016 | Egypt            | Breast Cancer                         | 12  | 20  | 51.3(25-82) |  | 82.8 | 6 |
| HamdyA.Azi<br>m | 2016 | Egypt            | Breast Cancer                         | 11  | 21  | 51.3(25-82) |  | 82.8 |   |
| Morton JP       | 2010 | UK               | Pancreatic cancer                     | 20  | 86  | NR          |  | 95   | 7 |
| Yang JY         | 2015 | China            | Pancreatic ductal<br>adenocarcinoma   | 36  | 169 | NR          |  | 97   | 8 |
| Li DZ           | 2018 | China            | Pancreatic<br>neuroendocrine<br>tumor | 38  | 33  | NR          |  | 190  | 8 |
| Yang XW         | 2012 | China            | Gastric Cancer                        | 76  | 24  | 65(31-85)   |  | 38   | 7 |
| Huang Y         | 2014 | China            | Gastric<br>carcinoma                  | 24  | 91  | 61(37-80)   |  | 75   | 6 |
| Ma LG           | 2016 | China            | Gastric Cancer                        | 62  | 47  | 57(31-84)   |  | 99   | 8 |
| Sun JJ          | 2016 | China            | Gastric Cancer                        | 107 | 48  | NR          |  | 70   | 6 |
| Yin M           | 2017 | China            | Gastric Cancer                        | 78  | 32  | 62(23-79)   |  | 72   | 7 |
| Huang YH        | 2013 | China            | Hepatocellular<br>carcinoma           | 31  | 39  | 57(43-72)   |  | 68   | 7 |
| Lee SW          | 2015 | China            | Hepatocellular<br>carcinoma           | 13  | 27  | NR          |  | 101  | 7 |
| Wu CC           | 2018 | China            | Hepatocellular<br>carcinoma           | 41  | 52  | NR          |  | 54   | 7 |

---

|    |          |      |       |                   |     |     |             |       |   |
|----|----------|------|-------|-------------------|-----|-----|-------------|-------|---|
| 1  |          |      |       |                   |     |     |             |       |   |
| 2  |          |      |       |                   |     |     |             |       |   |
| 3  |          |      |       |                   |     |     |             |       |   |
| 4  | Wang JH  | 2015 | China | Intrahepatic      | 187 | 129 | NR          | 99    | 8 |
| 5  |          |      |       | cholangiocarcino  |     |     |             |       |   |
| 6  |          |      |       | ma                |     |     |             |       |   |
| 7  |          |      |       |                   |     |     |             |       |   |
| 8  |          |      |       |                   |     |     |             |       |   |
| 9  | Ma JJ    | 2014 | China | Esophagus         | 73  | 47  | NR          | 60    | 8 |
| 10 |          |      |       | squamous          |     |     |             |       |   |
| 11 |          |      |       | cancer            |     |     |             |       |   |
| 12 |          |      |       |                   |     |     |             |       |   |
| 13 |          |      |       |                   |     |     |             |       |   |
| 14 |          |      |       |                   |     |     |             |       |   |
| 15 | He TY    | 2014 | China | Colorectal cancer | 63  | 95  | NR          | 80.5  | 5 |
| 16 |          |      |       |                   |     |     |             |       |   |
| 17 | Lu JL    | 2015 | China | Prostate Cancer   | 78  | 31  | NR          | 60    | 7 |
| 18 |          |      |       |                   |     |     |             |       |   |
| 19 | Huang JH | 2017 | China | Glioma            | 92  | 88  | 50.8(10-86) | 118   | 8 |
| 20 |          |      |       |                   |     |     |             |       |   |
| 21 |          |      |       |                   |     |     |             |       |   |
| 22 | He SS    | 2017 | China | Laryngeal         | 128 | 80  | NR          | 212.2 | 8 |
| 23 |          |      |       | squamous cell     |     |     |             |       |   |
| 24 |          |      |       | carcinoma         |     |     |             |       |   |
| 25 |          |      |       |                   |     |     |             |       |   |
| 26 |          |      |       |                   |     |     |             |       |   |
| 27 |          |      |       |                   |     |     |             |       |   |
| 28 |          |      |       |                   |     |     |             |       |   |
| 29 |          |      |       |                   |     |     |             |       |   |
| 30 |          |      |       |                   |     |     |             |       |   |
| 31 |          |      |       |                   |     |     |             |       |   |
| 32 |          |      |       |                   |     |     |             |       |   |
| 33 |          |      |       |                   |     |     |             |       |   |
| 34 |          |      |       |                   |     |     |             |       |   |
| 35 |          |      |       |                   |     |     |             |       |   |
| 36 |          |      |       |                   |     |     |             |       |   |
| 37 |          |      |       |                   |     |     |             |       |   |
| 38 |          |      |       |                   |     |     |             |       |   |
| 39 |          |      |       |                   |     |     |             |       |   |
| 40 |          |      |       |                   |     |     |             |       |   |
| 41 |          |      |       |                   |     |     |             |       |   |
| 42 |          |      |       |                   |     |     |             |       |   |
| 43 |          |      |       |                   |     |     |             |       |   |
| 44 |          |      |       |                   |     |     |             |       |   |
| 45 |          |      |       |                   |     |     |             |       |   |
| 46 |          |      |       |                   |     |     |             |       |   |
| 47 |          |      |       |                   |     |     |             |       |   |
| 48 |          |      |       |                   |     |     |             |       |   |
| 49 |          |      |       |                   |     |     |             |       |   |
| 50 |          |      |       |                   |     |     |             |       |   |
| 51 |          |      |       |                   |     |     |             |       |   |
| 52 |          |      |       |                   |     |     |             |       |   |
| 53 |          |      |       |                   |     |     |             |       |   |
| 54 |          |      |       |                   |     |     |             |       |   |
| 55 |          |      |       |                   |     |     |             |       |   |
| 56 |          |      |       |                   |     |     |             |       |   |
| 57 |          |      |       |                   |     |     |             |       |   |
| 58 |          |      |       |                   |     |     |             |       |   |
| 59 |          |      |       |                   |     |     |             |       |   |
| 60 |          |      |       |                   |     |     |             |       |   |

---

**Table 2.** LKB1 expression levels and survival.

| Study                    | Assay method | Staining location          | Cut-off value                                                       | Outcome | Analysis method | HR and 95%CI       |                    |
|--------------------------|--------------|----------------------------|---------------------------------------------------------------------|---------|-----------------|--------------------|--------------------|
| Ding XM                  | IHC          | Both nucleus and cytoplasm | Lower than in normal airway epithelium                              | OS      | UA              | 3.003(2.524-9.635) |                    |
| Tsai LH                  | IHC          | No specific description    | A score equal to or lower than 100                                  | OS      | UA              | 1.846(1.243-3.202) |                    |
|                          |              |                            |                                                                     |         | MA              | 1.868(1.160-3.007) |                    |
|                          |              |                            |                                                                     | RFS     | UA              | 1.828(1.247-3.122) |                    |
|                          |              |                            |                                                                     |         | MA              | 1.791(1.132-2.834) |                    |
| Yang LL                  | IHC          | Cytoplasm                  | Score of 0-4                                                        | OS      | UA              | 3.226(1.852-5.556) |                    |
|                          |              |                            |                                                                     |         | MA              | 2.128(1.136-4.000) |                    |
| Calles A                 | IHC          | Cytoplasm                  | No staining                                                         | OS      | UA              | 1.44(0.92-2.28)    |                    |
| ZhenZ                    | WB           | Total protein              | Bands of the breast cancer tissue in which the quantities were <0.5 | OS      | UA              | 3.754(1.899-10.75) |                    |
|                          |              |                            |                                                                     |         | DFS             | UA                 | 2.529(1.383-5.933) |
|                          |              |                            |                                                                     |         |                 |                    |                    |
| Bouchekioua-Bouzaghrou K | IHC          | Cytoplasm                  | Staining intensity recorded as 0-1                                  | OS      | UA              | 0.418(0.181-0.708) |                    |
|                          |              |                            |                                                                     |         | MA              | 0.403(0.199-0.820) |                    |
|                          |              |                            |                                                                     |         | DFS             | UA                 | 0.495(0.249-0.809) |
|                          |              |                            |                                                                     |         | MA              | 0.549(0.303-0.990) |                    |
| Bouchekioua-             | IHC          | nucleus                    | Staining intensity recorded as 0                                    | OS      | UA              | 1.417(0.722-2.704) |                    |

1

2

3

4 Bouzaghrou K

5

6

7

8

9

10

11

12

13

14

15

16

17

18

19

20

21

22

23

24

25

26

27

28

29

30

31

32

33

34

35

36

37

38

39

40

41

42

43

44

45

46

47

48

49

50

51

52

53

54

55

56

57

58

59

60

DFS UA 1.279(0.732-2.225)

OS UA 1.2(0.67-2.15)

MA 0.766(0.453-1.296)

OS UA 0.98(0.6-1.61)

MA 1.054(0.665-1.671)

OS UA 1.6(0.9-1.25)

MA 0.937(0.772-1.138)

OS UA 1.09(0.91-1.3)

MA 1.024(0.839-1.250)

RFS UA 1.11(0.16-7.49)

MA 0.81(0.22-3.03)

RFS UA 5.22(0.23-118.46)

MA 0.36(0.15-0.10)

OS UA 1.877(1.280-4.318)

MA 1.87(1.09-3.22)

OS UA 2.278(1.495-3.472)

MA 1.845(1.189-2.865)

OS UA 5.31(0.2-144.02)

|    |          |     |                                   |                                                                    |     |    |                      |
|----|----------|-----|-----------------------------------|--------------------------------------------------------------------|-----|----|----------------------|
| 1  |          |     |                                   |                                                                    |     |    |                      |
| 2  |          |     |                                   |                                                                    |     |    |                      |
| 3  |          |     | of the cells and/or weak staining |                                                                    |     |    |                      |
| 4  |          |     |                                   |                                                                    |     |    |                      |
| 5  |          |     |                                   |                                                                    |     |    |                      |
| 6  |          |     |                                   |                                                                    | DFS | UA | 2.19(0.41-11.7)      |
| 7  |          |     |                                   |                                                                    |     |    |                      |
| 8  |          |     |                                   |                                                                    |     |    |                      |
| 9  |          |     |                                   |                                                                    |     |    |                      |
| 10 | Yang XW  | IHC | Both nucleus and cytoplasm        | Staining intensity in the neoplasm less than that in normal mucosa | OS  | UA | 2.558(1.674-4.588)   |
| 11 |          |     |                                   |                                                                    |     |    |                      |
| 12 |          |     |                                   |                                                                    |     |    |                      |
| 13 |          |     |                                   |                                                                    |     |    |                      |
| 14 |          |     |                                   |                                                                    |     |    |                      |
| 15 |          |     |                                   |                                                                    |     |    |                      |
| 16 | Huang Y  | IHC | Both nucleus and cytoplasm        | Staining intensity recorded as 0-1                                 | OS  | UA | 2.514(1.026-4.092)   |
| 17 |          |     |                                   |                                                                    |     |    |                      |
| 18 |          |     |                                   |                                                                    |     |    |                      |
| 19 |          |     |                                   |                                                                    |     |    |                      |
| 20 |          |     |                                   |                                                                    |     |    |                      |
| 21 |          |     |                                   |                                                                    |     |    |                      |
| 22 |          |     |                                   |                                                                    |     |    |                      |
| 23 | Ma LG    | IHC | Both nucleus and cytoplasm        | Scores $\leq 1$                                                    | OS  | UA | 2.31(1.25-4.28)      |
| 24 |          |     |                                   |                                                                    |     |    |                      |
| 25 |          |     |                                   |                                                                    |     |    |                      |
| 26 |          |     |                                   |                                                                    |     | MA | 3.527(1.491-10.630)  |
| 27 |          |     |                                   |                                                                    |     |    |                      |
| 28 |          |     |                                   |                                                                    |     |    |                      |
| 29 | Sun JJ   | IHC | Both nucleus and cytoplasm        | Scores of 0 and 1+ indicate negative result                        | OS  | UA | 1.45(0.54-3.91)      |
| 30 |          |     |                                   |                                                                    |     |    |                      |
| 31 |          |     |                                   |                                                                    |     |    |                      |
| 32 |          |     |                                   |                                                                    |     |    |                      |
| 33 |          |     |                                   |                                                                    |     | MA | 4.431 (1.363-14.407) |
| 34 |          |     |                                   |                                                                    |     |    |                      |
| 35 | Lin M    | IHC | Both nucleus and cytoplasm        | Staining intensity recorded as 0-1                                 | OS  | UA | 1.07 (0.46-2.46)     |
| 36 |          |     |                                   |                                                                    |     |    |                      |
| 37 |          |     |                                   |                                                                    |     |    |                      |
| 38 |          |     |                                   |                                                                    |     |    |                      |
| 39 | Huang YH | IHC | Cytoplasm                         | Staining index score $\leq 3$                                      | OS  | UA | 3.155(1.603-6.211)   |
| 40 |          |     |                                   |                                                                    |     |    |                      |
| 41 |          |     |                                   |                                                                    |     | MA | 2.179(1.066-4.444)   |
| 42 |          |     |                                   |                                                                    |     |    |                      |
| 43 |          |     |                                   |                                                                    |     |    |                      |
| 44 |          |     |                                   |                                                                    | DFS | UA | 2.737(1.629-6.271)   |
| 45 |          |     |                                   |                                                                    |     |    |                      |
| 46 | Lee SW   | IHC | Both nucleus and cytoplasm        | H-score was lower than the median                                  | OS  | UA | 0.517(0.284-0.931)   |
| 47 |          |     |                                   |                                                                    |     |    |                      |
| 48 |          |     |                                   |                                                                    |     |    |                      |
| 49 |          |     |                                   |                                                                    |     |    |                      |
| 50 |          |     |                                   |                                                                    |     | MA | 0.333(0.193-0.564)   |
| 51 |          |     |                                   |                                                                    |     |    |                      |
| 52 | Wu CC    | IHC | No specific description           | Histoscore was $\leq 150$                                          | OS  | UA | 3.13(0.91-10.84)     |
| 53 |          |     |                                   |                                                                    |     |    |                      |
| 54 |          |     |                                   |                                                                    |     |    |                      |
| 55 |          |     |                                   |                                                                    |     |    |                      |
| 56 |          |     |                                   |                                                                    |     |    |                      |
| 57 |          |     |                                   |                                                                    |     |    |                      |
| 58 |          |     |                                   |                                                                    |     |    |                      |
| 59 |          |     |                                   |                                                                    |     |    |                      |
| 60 |          |     |                                   |                                                                    |     |    |                      |

|    |          |     |                  |                                     |     |    |                     |
|----|----------|-----|------------------|-------------------------------------|-----|----|---------------------|
| 1  |          |     |                  |                                     |     |    |                     |
| 2  |          |     |                  |                                     |     |    |                     |
| 3  |          |     |                  |                                     |     | MA | 4.26(1.87-9.69)     |
| 4  |          |     |                  |                                     |     |    |                     |
| 5  |          |     |                  |                                     |     |    |                     |
| 6  |          |     |                  |                                     | RFS | UA | 2.02(0.87-4.72)     |
| 7  |          |     |                  |                                     |     |    |                     |
| 8  |          |     |                  |                                     |     | MA | 2.05(1.11-3.81)     |
| 9  |          |     |                  |                                     |     |    |                     |
| 10 | Wang JH  | IHC | Cytoplasm        | Staining density lower than the     | OS  | UA | 1.857(1.498–2.483)  |
| 11 |          |     |                  | median value                        |     |    |                     |
| 12 |          |     |                  |                                     |     |    |                     |
| 13 |          |     |                  |                                     |     |    |                     |
| 14 |          |     |                  |                                     |     | MA | 1.824(1.404–2.377)  |
| 15 |          |     |                  |                                     |     |    |                     |
| 16 | Ma JJ    | IHC | Both nucleus and | Score of 0–4                        | OS  | UA | 0.57(0.33-0.97)     |
| 17 |          |     | cytoplasm        |                                     |     |    |                     |
| 18 |          |     |                  |                                     |     |    |                     |
| 19 |          |     |                  |                                     |     |    |                     |
| 20 | He TY    | IHC | No specific      | Score equal to or lower than 100    | OS  | UA | 2.364(1.576-4.112)  |
| 21 |          |     | description      |                                     |     |    |                     |
| 22 |          |     |                  |                                     |     |    |                     |
| 23 |          |     |                  |                                     |     |    |                     |
| 24 |          |     |                  |                                     |     | MA | 3.146(1.876-5.276)  |
| 25 |          |     |                  |                                     |     |    |                     |
| 26 |          |     |                  |                                     | RFS | UA | 2.522(1.701-4.445)  |
| 27 |          |     |                  |                                     |     |    |                     |
| 28 |          |     |                  |                                     |     |    |                     |
| 29 |          |     |                  |                                     |     | MA | 3.093(1.843-5.191)  |
| 30 |          |     |                  |                                     |     |    |                     |
| 31 | Lu JL    | IHC | No specific      | Staining of fewer than 20% of the   | OS  | UA | 6.31(0.42-94.67)    |
| 32 |          |     | description      | tissue cells or no staining         |     |    |                     |
| 33 |          |     |                  |                                     |     |    |                     |
| 34 |          |     |                  |                                     |     |    |                     |
| 35 |          |     |                  |                                     |     | MA | 3.981 (1.698–9.336) |
| 36 |          |     |                  |                                     |     |    |                     |
| 37 | Huang JH | IHC | No specific      | Percentage of positive cells $\leq$ | OS  | UA | 2.02(1.07-3.83)     |
| 38 |          |     | description      | 35%and/or staining intensity score  |     |    |                     |
| 39 |          |     |                  | of 0-1.                             |     |    |                     |
| 40 |          |     |                  |                                     |     |    |                     |
| 41 |          |     |                  |                                     |     |    |                     |
| 42 |          |     |                  |                                     |     | MA | 3.022(1.002-6.016)  |
| 43 |          |     |                  |                                     |     |    |                     |
| 44 |          |     |                  |                                     |     |    |                     |
| 45 | He SS    | IHC | Nucleus          | Score $\leq$ 4                      | OS  | UA | 1.17(0.72-1.9)      |
| 46 |          |     |                  |                                     |     |    |                     |
| 47 |          |     |                  |                                     |     | MA | 1.628(1.060–2.500)  |
| 48 |          |     |                  |                                     |     |    |                     |
| 49 |          |     |                  |                                     |     |    |                     |
| 50 |          |     |                  |                                     |     |    |                     |
| 51 |          |     |                  |                                     |     |    |                     |
| 52 |          |     |                  |                                     |     |    |                     |
| 53 |          |     |                  |                                     |     |    |                     |
| 54 |          |     |                  |                                     |     |    |                     |
| 55 |          |     |                  |                                     |     |    |                     |
| 56 |          |     |                  |                                     |     |    |                     |
| 57 |          |     |                  |                                     |     |    |                     |
| 58 |          |     |                  |                                     |     |    |                     |
| 59 |          |     |                  |                                     |     |    |                     |
| 60 |          |     |                  |                                     |     |    |                     |

For peer review only

**Table 3.** LKB1 expression and clinicopathological characteristics.

| Study | LKB1 expression | Age |     | Sex  |        | Tumor differentiation |      | Tumor size |     | Lymph node metastasis |    | TNM stage |
|-------|-----------------|-----|-----|------|--------|-----------------------|------|------------|-----|-----------------------|----|-----------|
|       |                 | ≥60 | <60 | Male | Female | Poor                  | Well | T3-        | T1- | Yes                   | No | III-IV    |

|                                 |                                  |     |    |     |    | T4  |     | T2 |     |     |     |    |
|---------------------------------|----------------------------------|-----|----|-----|----|-----|-----|----|-----|-----|-----|----|
| Huang YH                        | Low                              | 26  | 5  | 23  | 8  | 15  | 16  |    |     | 19  | 12  |    |
|                                 | High                             | 31  | 8  | 17  | 22 | 20  | 19  |    |     | 27  | 12  |    |
| He TY                           | Low                              |     |    |     |    |     |     |    |     |     |     |    |
|                                 | High                             |     |    |     |    |     |     |    |     |     |     |    |
| Bouchekio<br>ua-Bouzag<br>hou K | Low<br>(cytoplasmic<br>staining) |     |    | 69  | 25 | 26  | 68  | 50 | 44  |     |     |    |
|                                 | High                             |     |    | 54  | 6  | 18  | 42  | 38 | 22  |     |     |    |
|                                 | Low(nuclear<br>staining)         |     |    | 83  | 19 | 34  | 68  | 63 | 39  |     |     |    |
|                                 | High                             |     |    | 40  | 12 | 10  | 42  | 25 | 27  |     |     |    |
| ShenZ                           | Low                              |     |    | 35  | 3  | 13  | 25  |    |     |     |     |    |
|                                 | High                             |     |    | 69  | 14 | 11  | 73  |    |     |     |     |    |
| Tsai LH                         | Low                              | 25  | 19 |     |    | 9   | 35  | 35 | 9   | 28  | 16  |    |
|                                 | High                             | 41  | 30 |     |    | 9   | 62  | 31 | 40  | 24  | 47  |    |
| Jiang LL                        | Low                              | 16  | 17 | 17  | 16 | 23  | 10  |    | 18  | 15  | 12  | 21 |
|                                 | High                             | 49  | 60 | 65  | 44 | 34  | 75  |    | 44  | 65  | 23  | 86 |
| Yang JY                         | Low                              | 16  | 20 | 32  | 4  | 35  | 1   | 17 | 19  | 16  | 20  |    |
|                                 | High                             | 101 | 68 | 159 | 10 | 132 | 37  | 45 | 124 | 31  | 138 |    |
| Calles A                        | Low                              | 14  | 28 |     |    |     |     |    |     |     |     |    |
|                                 | High                             | 25  | 59 |     |    |     |     |    |     |     |     |    |
| Wang JH                         | Low                              | 122 | 65 | 162 | 25 | 112 | 100 | 76 | 111 | 117 | 70  |    |



|    |           |      |    |    |    |    |     |    |    |     |     |     |    |
|----|-----------|------|----|----|----|----|-----|----|----|-----|-----|-----|----|
| 1  |           |      |    |    |    |    |     |    |    |     |     |     |    |
| 2  |           |      |    |    |    |    |     |    |    |     |     |     |    |
| 3  |           | High |    | 93 | 46 | 90 | 49  | 63 | 51 | 42  | 97  | 56  | 83 |
| 4  |           |      |    |    |    |    |     |    |    |     |     |     |    |
| 5  | Morton JP | Low  |    |    |    |    |     |    |    |     |     |     |    |
| 6  |           |      |    |    |    |    |     |    |    |     |     |     |    |
| 7  |           | High |    |    |    |    |     |    |    |     |     |     |    |
| 8  |           |      |    |    |    |    |     |    |    |     |     |     |    |
| 9  |           |      |    |    |    |    |     |    |    |     |     |     |    |
| 10 | Ding XM   | Low  | 12 | 12 | 13 | 11 |     | 9  | 15 | 3   | 21  | 22  | 2  |
| 11 |           |      |    |    |    |    |     |    |    |     |     |     |    |
| 12 |           | High | 21 | 17 | 14 | 24 |     | 7  | 31 | 8   | 20  | 15  | 23 |
| 13 |           |      |    |    |    |    |     |    |    |     |     |     |    |
| 14 |           |      |    |    |    |    |     |    |    |     |     |     |    |
| 15 | Yang XW   | Low  | 52 | 24 | 60 | 16 | 62  | 14 | 57 | 19  | 59  | 17  | 48 |
| 16 |           |      |    |    |    |    |     |    |    |     |     |     |    |
| 17 |           | High | 16 | 8  | 20 | 4  | 20  | 4  | 13 | 11  | 7   | 17  | 6  |
| 18 |           |      |    |    |    |    |     |    |    |     |     |     |    |
| 19 | Wu CC     | Low  | 17 | 24 | 32 | 9  |     |    |    |     |     | 26  | 15 |
| 20 |           |      |    |    |    |    |     |    |    |     |     |     |    |
| 21 |           | High | 25 | 27 | 45 | 7  |     |    |    |     |     | 32  | 20 |
| 22 |           |      |    |    |    |    |     |    |    |     |     |     |    |
| 23 |           |      |    |    |    |    |     |    |    |     |     |     |    |
| 24 | Yin M     | Low  | 43 | 35 | 54 | 24 | 57  | 21 | 71 | 7   | 56  | 22  | 68 |
| 25 |           |      |    |    |    |    |     |    |    |     |     |     |    |
| 26 |           | High | 19 | 13 | 23 | 9  | 12  | 20 | 24 | 8   | 11  | 21  | 12 |
| 27 |           |      |    |    |    |    |     |    |    |     |     |     |    |
| 28 |           |      |    |    |    |    |     |    |    |     |     |     |    |
| 29 | Huang Y   | Low  | 51 | 17 |    |    |     |    | 65 | 26  | 64  | 27  | 80 |
| 30 |           |      |    |    |    |    |     |    |    |     |     |     |    |
| 31 |           | High | 40 | 7  |    |    |     |    | 16 | 8   | 8   | 16  | 10 |
| 32 |           |      |    |    |    |    |     |    |    |     |     |     |    |
| 33 | Ma LG     | Low  | 51 | 22 | 60 | 13 | 60  | 13 | 48 | 25  | 24  | 49  | 31 |
| 34 |           |      |    |    |    |    |     |    |    |     |     |     |    |
| 35 |           | high | 36 | 11 | 36 | 11 | 24  | 23 | 24 | 23  | 5   | 42  | 6  |
| 36 |           |      |    |    |    |    |     |    |    |     |     |     |    |
| 37 |           |      |    |    |    |    |     |    |    |     |     |     |    |
| 38 | Chen IC   | low  |    |    |    |    | 126 | 25 | 16 | 145 | 67  | 91  | 23 |
| 39 |           |      |    |    |    |    |     |    |    |     |     |     |    |
| 40 |           | High |    |    |    |    | 311 | 81 | 34 | 372 | 152 | 253 | 57 |
| 41 |           |      |    |    |    |    |     |    |    |     |     |     |    |
| 42 |           | Low  |    |    |    |    | 83  | 2  | 6  | 82  | 56  | 32  | 36 |
| 43 |           |      |    |    |    |    |     |    |    |     |     |     |    |
| 44 |           | High |    |    |    |    | 177 | 12 | 15 | 174 | 106 | 83  | 66 |
| 45 |           |      |    |    |    |    |     |    |    |     |     |     |    |
| 46 |           | Low  |    |    |    |    | 457 | 37 | 20 | 474 | 241 | 253 | 85 |
| 47 |           |      |    |    |    |    |     |    |    |     |     |     |    |
| 48 |           | High |    |    |    |    | 459 | 35 | 26 | 468 | 235 | 259 | 88 |
| 49 |           |      |    |    |    |    |     |    |    |     |     |     |    |
| 50 |           | Low  |    |    |    |    | 392 | 49 | 29 | 451 | 241 | 238 | 88 |
| 51 |           |      |    |    |    |    |     |    |    |     |     |     |    |
| 52 |           | High |    |    |    |    | 398 | 46 | 24 | 446 | 213 | 260 | 85 |
| 53 |           |      |    |    |    |    |     |    |    |     |     |     |    |
| 54 |           |      |    |    |    |    |     |    |    |     |     |     |    |
| 55 |           |      |    |    |    |    |     |    |    |     |     |     |    |
| 56 |           |      |    |    |    |    |     |    |    |     |     |     |    |
| 57 |           |      |    |    |    |    |     |    |    |     |     |     |    |
| 58 |           |      |    |    |    |    |     |    |    |     |     |     |    |
| 59 |           |      |    |    |    |    |     |    |    |     |     |     |    |
| 60 |           |      |    |    |    |    |     |    |    |     |     |     |    |

1  
2  
3  
4  
5  
6  
7  
8  
9  
10  
11  
12  
13  
14  
15  
16  
17  
18  
19  
20  
21  
22  
23  
24  
25  
26  
27  
28  
29  
30  
31  
32  
33  
34  
35  
36  
37  
38  
39  
40  
41  
42  
43  
44  
45  
46  
47  
48  
49  
50  
51  
52  
53  
54  
55  
56  
57  
58  
59  
60

|                 |      |    |    |    |    |    |    |    |    |    |    |    |    |  |
|-----------------|------|----|----|----|----|----|----|----|----|----|----|----|----|--|
| Li DZ           | Low  |    |    | 26 | 12 | 6  | 32 |    |    |    |    |    |    |  |
|                 | High |    |    | 16 | 17 | 1  | 32 |    |    |    |    |    |    |  |
| Huang YH        | Low  |    |    | 56 | 36 |    |    | 52 | 40 |    |    | 77 | 15 |  |
|                 | High |    |    | 54 | 34 |    |    | 20 | 68 |    |    | 43 | 55 |  |
| HamdyA.<br>Azim | Low  |    |    |    |    |    |    |    |    |    |    |    |    |  |
|                 | High |    |    |    |    |    |    |    |    |    |    |    |    |  |
| Lu JL           | Low  |    |    |    |    |    |    |    |    |    |    | 47 | 31 |  |
|                 | High |    |    |    |    |    |    |    |    |    |    | 11 | 20 |  |
| He SS           | Low  |    |    |    |    |    |    |    |    |    |    |    |    |  |
|                 | High |    |    |    |    |    |    |    |    |    |    |    |    |  |
| Ma JJ           | Low  | 29 | 33 | 40 | 22 | 27 | 35 | 44 | 18 | 51 | 11 | 28 | 34 |  |
|                 | High | 30 | 17 | 31 | 16 | 19 | 28 | 18 | 29 | 29 | 18 | 9  | 38 |  |
| Lee SW          | Low  |    |    |    |    |    |    |    |    |    |    |    |    |  |
|                 | High |    |    |    |    |    |    |    |    |    |    |    |    |  |
| Sun JJ          | Low  | 60 | 47 | 79 | 28 | 78 | 29 | 73 | 34 | 60 | 47 | 55 | 52 |  |
|                 | High | 28 | 20 | 42 | 6  | 38 | 10 | 22 | 26 | 16 | 32 | 8  | 40 |  |

Table 4. Subgroup analyses of the association between LKB1 expression and OS after stratification by statistical analysis method, LKB1 assay method, country, cancer type, and intracellular staining location.

| Stratification criterion | Value                      | HR(95%CI)       | P value | Heterogeneity |         |
|--------------------------|----------------------------|-----------------|---------|---------------|---------|
|                          |                            |                 |         | $I^2$         | P value |
| Analysis method          | Univariate                 | 1.61(1.36-1.92) | <0.001  | 76%           | <0.001  |
|                          | Multivariate               | 1.61(1.26-2.06) | <0.001  | 81%           | <0.001  |
| Assay method             | IHC                        | 1.58(1.33-1.89) | <0.001  | 77%           | <0.001  |
|                          | The others                 |                 |         |               |         |
| Country                  | Asian                      | 1.71(1.42-2.07) | <0.001  | 78%           | <0.001  |
|                          | Not Asian                  | 1.15(0.63-2.08) | 0.65    | 75%           | 0.007   |
| Cancer type              | Lung                       | 2.07(1.60-2.69) | <0.001  | 53%           | 0.09    |
|                          | Breast                     | 1.26(1.15-1.37) | <0.001  | 79%           | <0.001  |
|                          | Gastric                    | 2.19(1.60-3.01) | <0.001  | 10%           | 0.34    |
|                          | Pancreatic                 | 2.16(1.53-3.05) | <0.001  | 0%            | 0.76    |
|                          | Hepatocellular carcinoma   | 1.27(0.84-1.94) | 0.26    | 89%           | <0.001  |
|                          | The others                 | 1.63(1.35-1.96) | <0.001  | 79%           | <0.001  |
| Staining position        | Both nucleus and cytoplasm | 1.69(1.33-2.16) | <0.001  | 76%           | <0.001  |
|                          | Cytoplasm                  | 1.78(1.49-2.13) | <0.001  | 77%           | <0.001  |

|         |                 |        |     |        |
|---------|-----------------|--------|-----|--------|
| Nucleus | 1.25(0.85-1.85) | 0.26   | 0%  | 0.65   |
| Other   | 1.36(1.25-1.47) | <0.001 | 75% | <0.001 |

For peer review only

1  
2  
3  
4  
5  
6  
7  
8  
9  
10  
11  
12  
13  
14  
15  
16  
17  
18  
19  
20  
21  
22  
23  
24  
25  
26  
27  
28  
29  
30  
31  
32  
33  
34  
35  
36  
37  
38  
39  
40  
41  
42  
43  
44  
45  
46  
47  
48  
49  
50  
51  
52  
53  
54  
55  
56  
57  
58  
59  
60

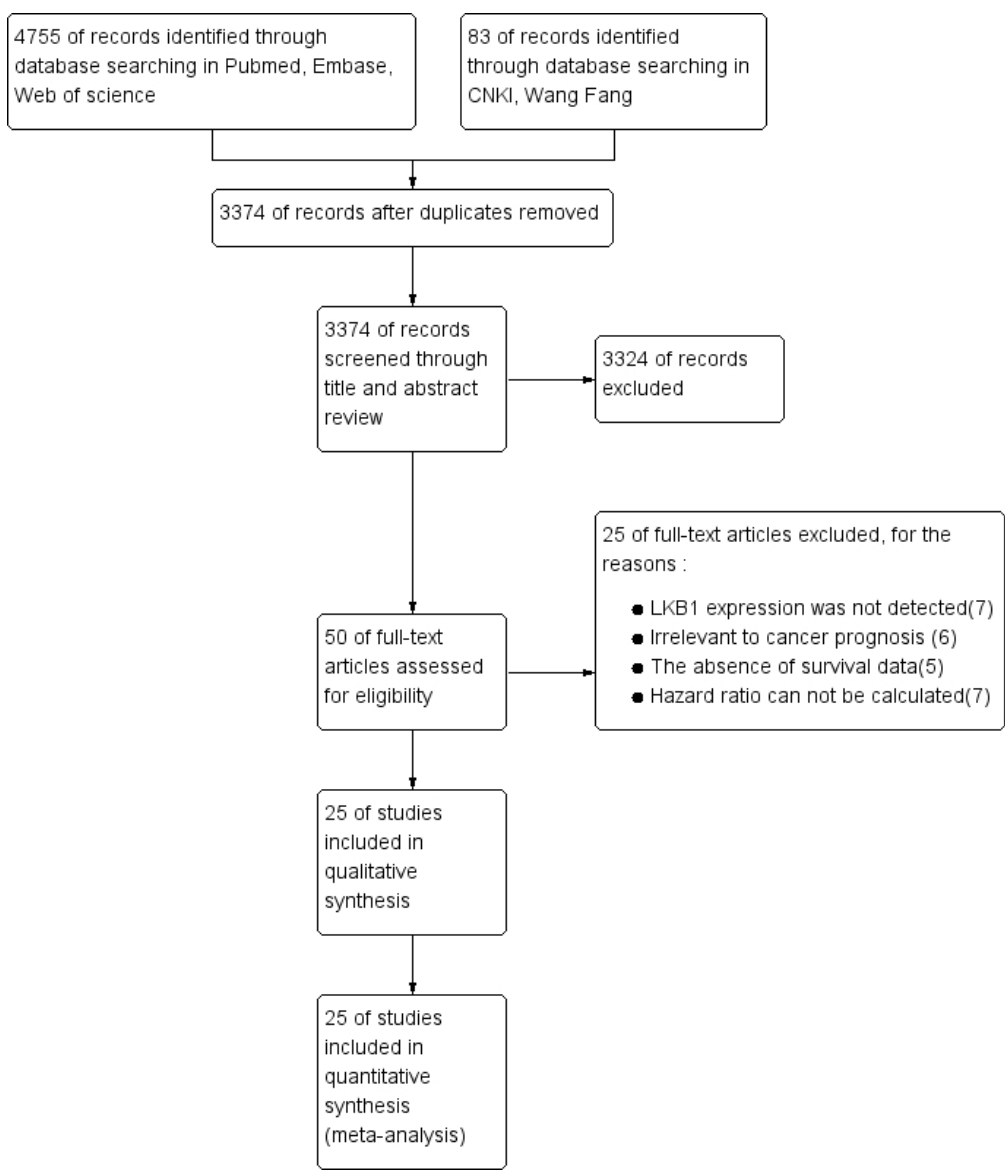

Figure 1. Flow diagram of study inclusion and meta-analysis.

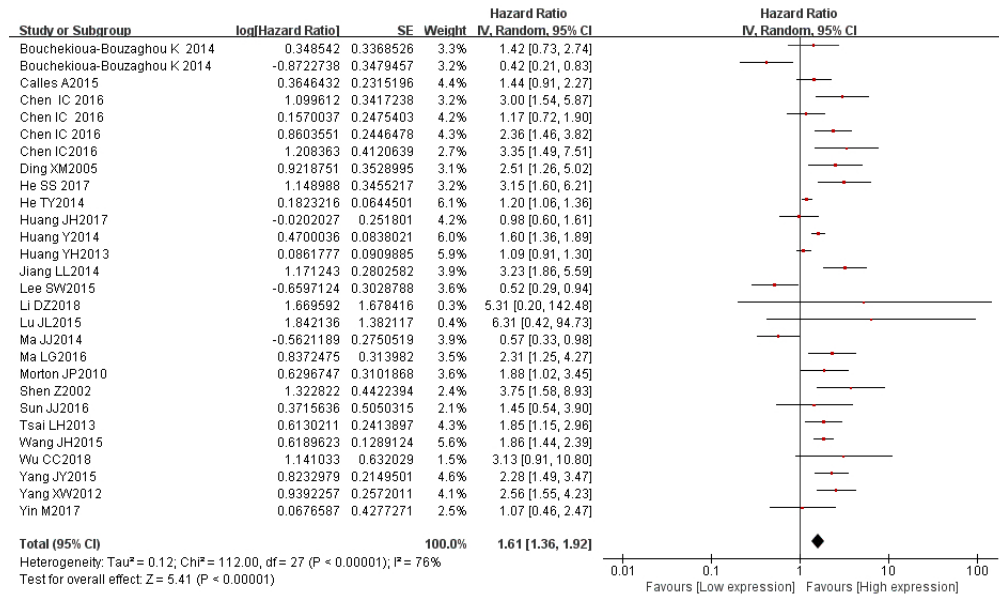

Figure 2A. Forest plot of OS by univariate analysis.

330x197mm (72 x 72 DPI)

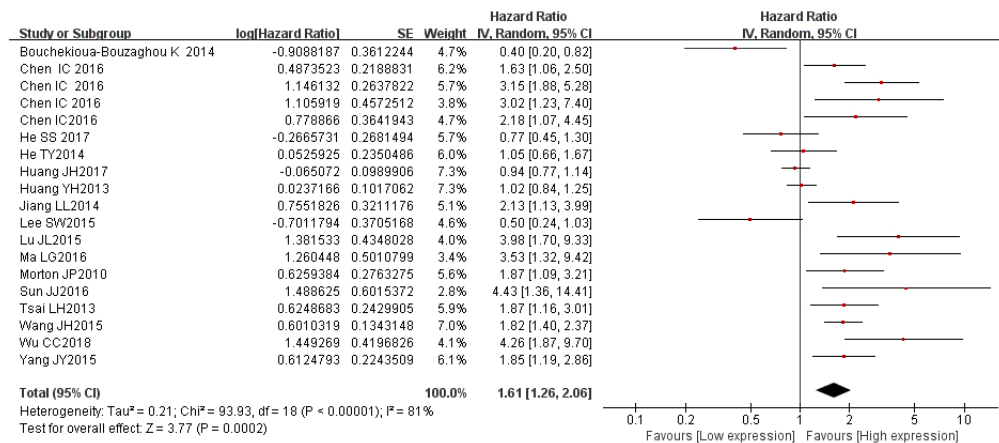

Figure 2B. Forest plot of OS by multivariate analysis.

330x146mm (72 x 72 DPI)

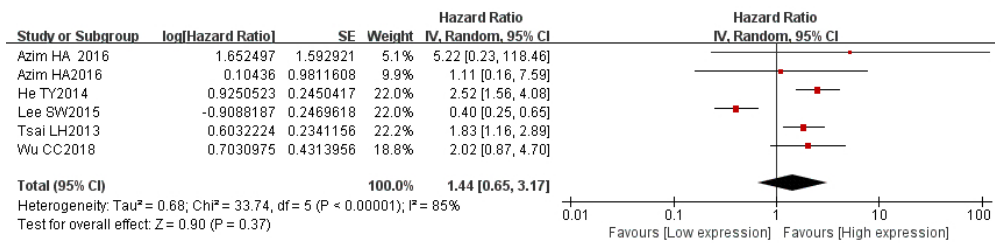

Figure 2C. Forest plot of RFS by univariate analysis.

302x73mm (72 x 72 DPI)



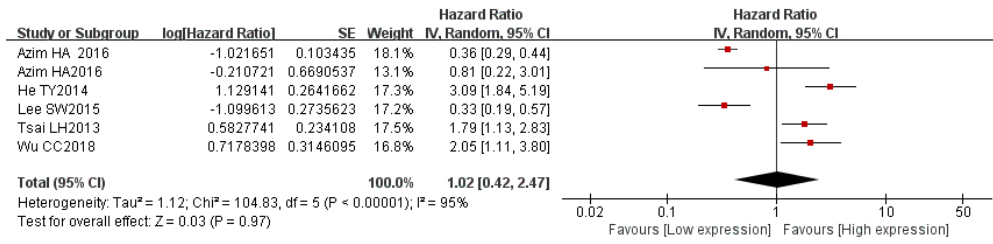

Figure 2D. Forest plot of RFS by multivariate analysis.

302x73mm (72 x 72 DPI)

1  
2  
3  
4  
5  
6  
7  
8  
9  
10  
11  
12  
13  
14  
15  
16  
17  
18  
19  
20  
21  
22  
23  
24  
25  
26  
27  
28  
29  
30  
31  
32  
33  
34  
35  
36  
37  
38  
39  
40  
41  
42  
43  
44  
45  
46  
47  
48  
49  
50  
51  
52  
53  
54  
55  
56  
57  
58  
59  
60

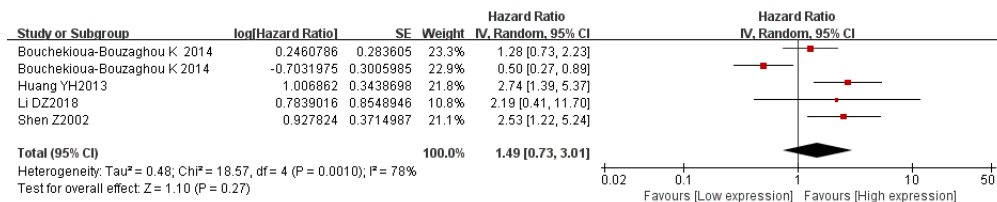

Figure 2E.Forest plot of DFS by univariate analysis.

330x67mm (72 x 72 DPI)

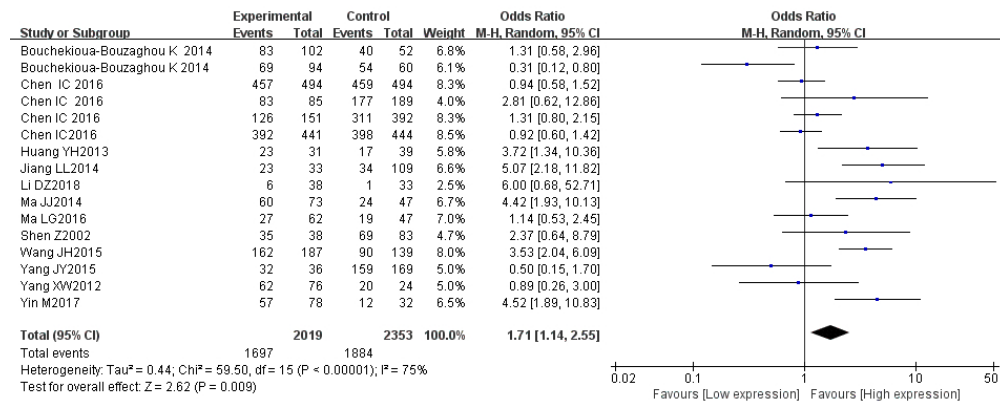

Figure 3A. Meta-analysis of the relationship between low LKB1 expression and tumor differentiation.

335x135mm (72 x 72 DPI)

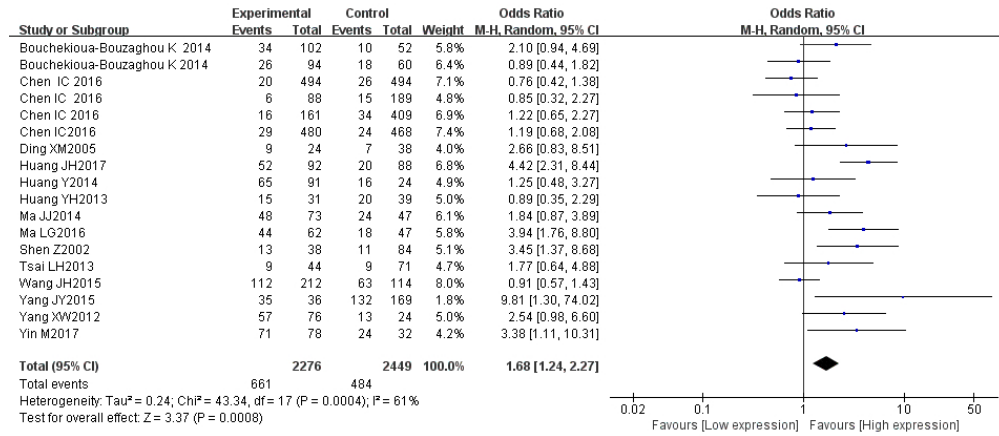

Figure3B.Meta-analysis of the relationship between low LKB1 expression and tumor size.

335x146mm (72 x 72 DPI)

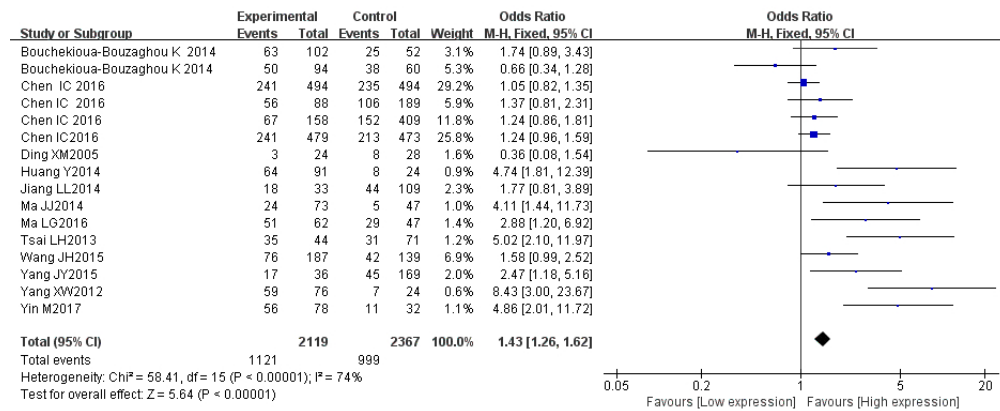

Figure 3C. Meta-analysis of the relationship between low LKB1 expression and lymph node metastasis.

329x135mm (72 x 72 DPI)

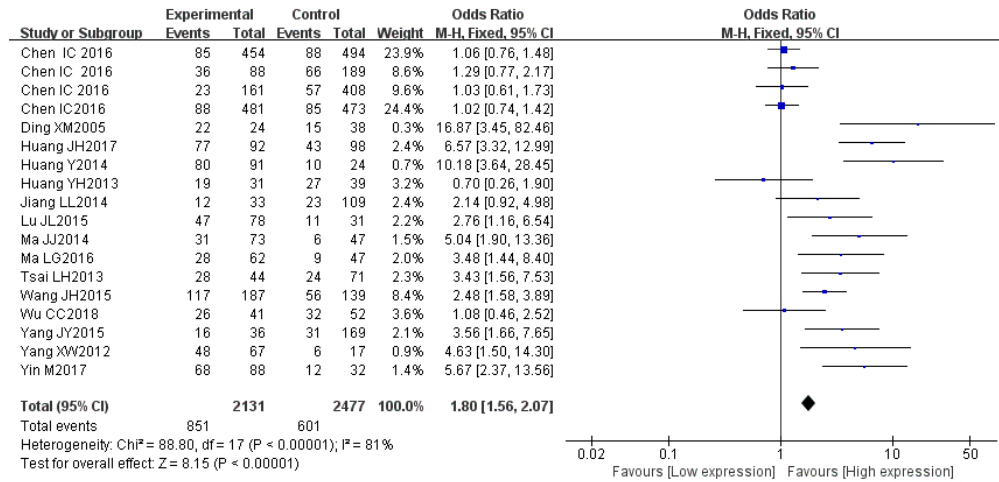

Figure 3D. Meta-analysis of the relationship between low LKB1 expression and TNM stage.

302x146mm (72 x 72 DPI)

1  
2  
3  
4  
5  
6  
7  
8  
9  
10  
11  
12  
13  
14  
15  
16  
17  
18  
19  
20  
21  
22  
23  
24  
25  
26  
27  
28  
29  
30  
31  
32  
33  
34  
35  
36  
37  
38  
39  
40  
41  
42  
43  
44  
45  
46  
47  
48  
49  
50  
51  
52  
53  
54  
55  
56  
57  
58  
59  
60

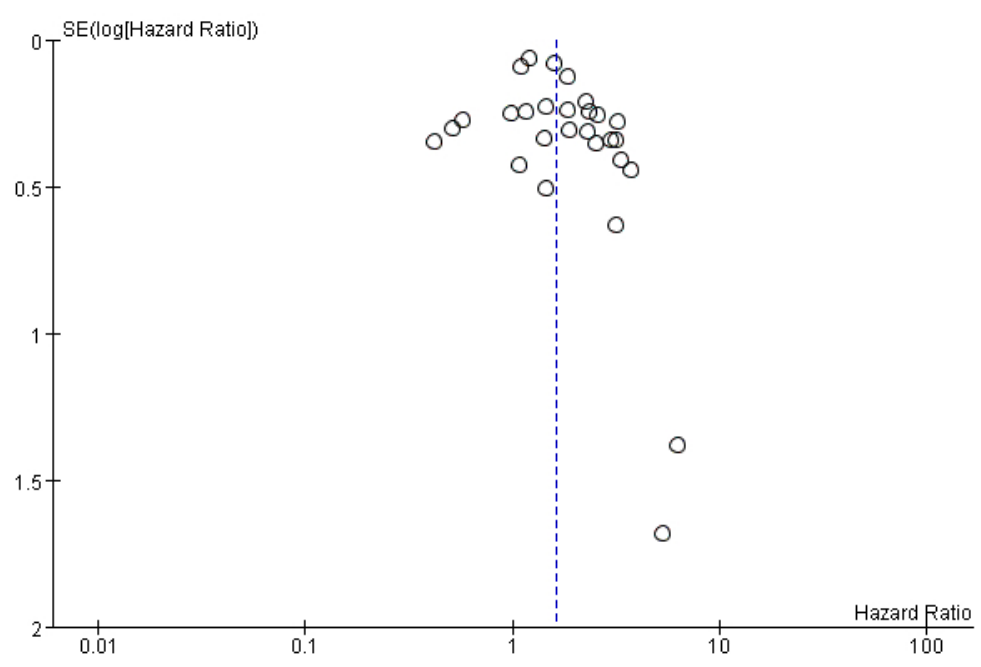

Figure4. Funnel plot of OS by univariate analysis.

211x141mm (72 x 72 DPI)

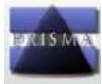

# PRISMA 2009 Checklist

1  
2  
3  
4  
5  
6  
7  
8  
9  
10  
11  
12  
13  
14  
15  
16  
17  
18  
19  
20  
21  
22  
23  
24  
25  
26  
27  
28  
29  
30  
31  
32  
33  
34  
35  
36  
37  
38  
39  
40  
41  
42  
43  
44  
45  
46  
47

| Section/topic                      | #  | Checklist item                                                                                                                                                                                                                                                                                              | Reported on page # |
|------------------------------------|----|-------------------------------------------------------------------------------------------------------------------------------------------------------------------------------------------------------------------------------------------------------------------------------------------------------------|--------------------|
| <b>TITLE</b>                       |    |                                                                                                                                                                                                                                                                                                             |                    |
| Title                              | 1  | Identify the report as a meta-analysis.                                                                                                                                                                                                                                                                     | 1                  |
| <b>ABSTRACT</b>                    |    |                                                                                                                                                                                                                                                                                                             |                    |
| Structured summary                 | 2  | Provide a structured summary including, as applicable: background; objectives; data sources; study eligibility criteria, participants, and interventions; study appraisal and synthesis methods; results; limitations; conclusions and implications of key findings; systematic review registration number. | 2                  |
| <b>INTRODUCTION</b>                |    |                                                                                                                                                                                                                                                                                                             |                    |
| Rationale                          | 3  | Describe the rationale for the review in the context of what is already known.                                                                                                                                                                                                                              | 3                  |
| Objectives                         | 4  | Provide an explicit statement of questions being addressed with reference to participants, interventions, comparisons, outcomes, and study design (PICOS).                                                                                                                                                  | 4                  |
| <b>METHODS</b>                     |    |                                                                                                                                                                                                                                                                                                             |                    |
| Protocol and registration          | 5  | Indicate if a review protocol exists, if and where it can be accessed (e.g., Web address), and, if available, provide registration information including registration number.                                                                                                                               | n/a                |
| Eligibility criteria               | 6  | Specify study characteristics (e.g., PICOS, length of follow-up) and report characteristics (e.g., years considered, language, publication status) used as criteria for eligibility, giving rationale.                                                                                                      | 4                  |
| Information sources                | 7  | Describe all information sources (e.g., databases with dates of coverage, contact with study authors to identify additional studies) in the search and date last searched.                                                                                                                                  | 4                  |
| Search                             | 8  | Present full electronic search strategy for at least one database, including any limits used, such that it could be repeated.                                                                                                                                                                               | 4                  |
| Study selection                    | 9  | State the process for selecting studies (i.e., screening, eligibility, included in systematic review, and, if applicable, included in the meta-analysis).                                                                                                                                                   | 4                  |
| Data collection process            | 10 | Describe method of data extraction from reports (e.g., piloted forms, independently, in duplicate) and any processes for obtaining and confirming data from investigators.                                                                                                                                  | 4                  |
| Data items                         | 11 | List and define all variables for which data were sought (e.g., PICOS, funding sources) and any assumptions and simplifications made.                                                                                                                                                                       | 4                  |
| Risk of bias in individual studies | 12 | Describe methods used for assessing risk of bias of individual studies (including specification of whether this was done at the study or outcome level), and how this information is to be used in any data synthesis.                                                                                      | 5                  |
| Summary measures                   | 13 | State the principal summary measures (e.g., risk ratio, difference in means).                                                                                                                                                                                                                               | 5                  |
| Synthesis of results               | 14 | Describe the methods of handling data and combining results of studies, if done, including measures of consistency (e.g., I <sup>2</sup> ) for each meta-analysis.                                                                                                                                          | 5-6                |



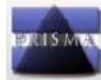

# PRISMA 2009 Checklist

Page 1 of 2

| Section/topic                 | #  | Checklist item                                                                                                                                                                                           | Reported on page # |
|-------------------------------|----|----------------------------------------------------------------------------------------------------------------------------------------------------------------------------------------------------------|--------------------|
| Risk of bias across studies   | 15 | Specify any assessment of risk of bias that may affect the cumulative evidence (e.g., publication bias, selective reporting within studies).                                                             | 6                  |
| Additional analyses           | 16 | Describe methods of additional analyses (e.g., sensitivity or subgroup analyses, meta-regression), if done, indicating which were pre-specified.                                                         | 6                  |
| <b>RESULTS</b>                |    |                                                                                                                                                                                                          |                    |
| Study selection               | 17 | Give numbers of studies screened, assessed for eligibility, and included in the review, with reasons for exclusions at each stage, ideally with a flow diagram.                                          | 6                  |
| Study characteristics         | 18 | For each study, present characteristics for which data were extracted (e.g., study size, PICOS, follow-up period) and provide the citations.                                                             | 6                  |
| Risk of bias within studies   | 19 | Present data on risk of bias of each study and, if available, any outcome level assessment (see item 12).                                                                                                | 7                  |
| Results of individual studies | 20 | For all outcomes considered (benefits or harms), present, for each study: (a) simple summary data for each intervention group (b) effect estimates and confidence intervals, ideally with a forest plot. | 7                  |
| Synthesis of results          | 21 | Present results of each meta-analysis done, including confidence intervals and measures of consistency.                                                                                                  | 7                  |
| Risk of bias across studies   | 22 | Present results of any assessment of risk of bias across studies (see Item 15).                                                                                                                          | 8                  |
| Additional analysis           | 23 | Give results of additional analyses, if done (e.g., sensitivity or subgroup analyses, meta-regression [see Item 16]).                                                                                    | 8                  |
| <b>DISCUSSION</b>             |    |                                                                                                                                                                                                          |                    |
| Summary of evidence           | 24 | Summarize the main findings including the strength of evidence for each main outcome; consider their relevance to key groups (e.g., healthcare providers, users, and policy makers).                     | 9                  |
| Limitations                   | 25 | Discuss limitations at study and outcome level (e.g., risk of bias), and at review-level (e.g., incomplete retrieval of identified research, reporting bias).                                            | 10                 |
| Conclusions                   | 26 | Provide a general interpretation of the results in the context of other evidence, and implications for future research.                                                                                  | 11                 |
| <b>FUNDING</b>                |    |                                                                                                                                                                                                          |                    |
| Funding                       | 27 | Describe sources of funding for the systematic review and other support (e.g., supply of data); role of funders for the systematic review.                                                               | 1                  |

From: Moher D, Liberati A, Tetzlaff J, Altman DG, The PRISMA Group (2009). Preferred Reporting Items for Systematic Reviews and Meta-Analyses: The PRISMA Statement. PLoS Med 6(6): e1000097. doi:10.1371/journal.pmed1000097

For more information, visit: [www.prisma-statement.org](http://www.prisma-statement.org).

Page 2 of 2

For peer review only - <http://bmjopen.bmj.com/site/about/guidelines.xhtml>

# BMJ Open

## Association between LKB1 expression and prognosis of patients with solid tumors: an updated systematic review and meta-analysis

|                                 |                                                                                                                                                                                                                                                                                                                                                                                                                                                                                                                                                                                                                                                                                                                                                                                                                                                                                                                                                                                                                                                                                                                                                                                                                                                   |
|---------------------------------|---------------------------------------------------------------------------------------------------------------------------------------------------------------------------------------------------------------------------------------------------------------------------------------------------------------------------------------------------------------------------------------------------------------------------------------------------------------------------------------------------------------------------------------------------------------------------------------------------------------------------------------------------------------------------------------------------------------------------------------------------------------------------------------------------------------------------------------------------------------------------------------------------------------------------------------------------------------------------------------------------------------------------------------------------------------------------------------------------------------------------------------------------------------------------------------------------------------------------------------------------|
| Journal:                        | <i>BMJ Open</i>                                                                                                                                                                                                                                                                                                                                                                                                                                                                                                                                                                                                                                                                                                                                                                                                                                                                                                                                                                                                                                                                                                                                                                                                                                   |
| Manuscript ID                   | bmjopen-2018-027185.R1                                                                                                                                                                                                                                                                                                                                                                                                                                                                                                                                                                                                                                                                                                                                                                                                                                                                                                                                                                                                                                                                                                                                                                                                                            |
| Article Type:                   | Research                                                                                                                                                                                                                                                                                                                                                                                                                                                                                                                                                                                                                                                                                                                                                                                                                                                                                                                                                                                                                                                                                                                                                                                                                                          |
| Date Submitted by the Author:   | 27-Mar-2019                                                                                                                                                                                                                                                                                                                                                                                                                                                                                                                                                                                                                                                                                                                                                                                                                                                                                                                                                                                                                                                                                                                                                                                                                                       |
| Complete List of Authors:       | Ren, Yun; Guangxi Cancer Hospital and Guangxi Medical University Affiliated Cancer Hospital, hepatological surgery department<br>Zhao, Feng; Affiliated Tumor Hospital of Guangxi Medical University, Hepatobiliary Surgery Department<br>Mo, Han; Affiliated Tumor Hospital of Guangxi Medical University, Hepatobiliary Surgery Department<br>Jia, Rong; Affiliated Tumor Hospital of Guangxi Medical University, Hepatobiliary Surgery Department<br>Tang, Juan; Affiliated Tumor Hospital of Guangxi Medical University, Hepatobiliary Surgery Department<br>Zhao, Xin; Affiliated Tumor Hospital of Guangxi Medical University, Hepatobiliary Surgery Department<br>Wei, Jue; Affiliated Tumor Hospital of Guangxi Medical University, Hepatobiliary Surgery Department; Guangxi medical university<br>Huo, Rong; Affiliated Tumor Hospital of Guangxi Medical University, Hepatobiliary Surgery Department<br>Li, Qiu; Affiliated Tumor Hospital of Guangxi Medical University, Hepatobiliary Surgery Department<br>You, Xue; Guangxi Cancer Hospital and Guangxi Medical University Affiliated Cancer Hospital, hepatological surgery department ; Guangxi Liver Cancer Diagnosis and Treatment Engineering and Technology Research Center |
| <b>Primary Subject Heading</b>: | Oncology                                                                                                                                                                                                                                                                                                                                                                                                                                                                                                                                                                                                                                                                                                                                                                                                                                                                                                                                                                                                                                                                                                                                                                                                                                          |
| Secondary Subject Heading:      | Diagnostics                                                                                                                                                                                                                                                                                                                                                                                                                                                                                                                                                                                                                                                                                                                                                                                                                                                                                                                                                                                                                                                                                                                                                                                                                                       |
| Keywords:                       | LKB1, STK11, liver kinase B1, prognosis                                                                                                                                                                                                                                                                                                                                                                                                                                                                                                                                                                                                                                                                                                                                                                                                                                                                                                                                                                                                                                                                                                                                                                                                           |
|                                 |                                                                                                                                                                                                                                                                                                                                                                                                                                                                                                                                                                                                                                                                                                                                                                                                                                                                                                                                                                                                                                                                                                                                                                                                                                                   |

SCHOLARONE™  
Manuscripts

1  
2  
3  
4 **Association between LKB1 expression and prognosis of patients with solid tumors: an**  
5  
6 **updated systematic review and meta-analysis**  
7

8 Yun-Hong Ren<sup>1</sup>, Feng-Juan Zhao<sup>1,2</sup>, Han-Yue Mo<sup>1</sup>, Rong-Rong Jia<sup>1</sup>, Juan Tang<sup>1</sup>, Xin-Hua  
9 Zhao<sup>1</sup>, Jue-Ling Wei<sup>1,2</sup>, Rong-Rui Huo<sup>1</sup>, Qiu-Qin Li<sup>1</sup>, Xue-Mei You<sup>1</sup>  
10  
11

12 **Author affiliations**  
13

- 14  
15 1. Hepatobiliary Surgery Department, Affiliated Tumor Hospital of Guangxi Medical  
16 University, Nanning, China  
17  
18 2. Guangxi Liver Cancer Diagnosis and Treatment Engineering and Technology Research  
19 Center, Nanning, China  
20  
21  
22  
23  
24

25 **Correspondence:**  
26

27 Xue-Mei You, Hepatobiliary Surgery Department, Affiliated Tumor Hospital of Guangxi  
28 Medical University, He Di Rd #71, Nanning 530021, China  
29

30 Email: you\_xuemei77@163.com  
31

32 Telephone: +86 771 533 0855  
33

34 Fax: +86 771 531 2000  
35  
36  
37  
38  
39  
40  
41  
42  
43  
44  
45  
46  
47  
48  
49  
50  
51  
52  
53  
54  
55  
56  
57  
58  
59  
60

1  
2  
3  
4  
5  
6  
7 ***Strengths and limitations of this study***  
8

- 9
- 10 ◆ This review included large sample size to reveal the relationship between the expression  
11 of LKB1 and solid tumors.  
12
  - 13 ◆ Subgroup analyses and sensitivity analyses were performed to confirm the findings.  
14
  - 15 ◆ The cut-off value of LKB1 among the included studies were inconsistent.  
16  
17  
18  
19  
20  
21  
22  
23  
24  
25  
26  
27  
28  
29  
30  
31  
32  
33  
34  
35  
36  
37  
38  
39  
40  
41  
42  
43  
44  
45  
46  
47  
48  
49  
50  
51  
52  
53  
54  
55  
56  
57  
58  
59  
60

## Abstract

**Objectives.** Liver kinase B1 (LKB1) is considered a tumor suppressor that can control cell growth and metabolism. Whether LKB1 expression levels are related to clinicopathology and prognosis is controversial. This review aimed to quantitatively examine the latest evidence on this question.

**Design.** An updated systematic review and meta-analysis on the association between LKB1 expression and prognosis of patients with solid tumors were performed.

**Data sources.** Eligible studies were identified through literature searches from database establishment until June 15, 2018 in the following databases: Embase, PubMed, Web of Science, Cochrane Library, China National Knowledge Infrastructure and Wan Fang databases.

**Eligibility criteria.** The association between LKB1 expression and clinicopathological characteristics, overall survival (OS), disease-free survival (DFS), and relapse-free survival (RFS) of patients with solid tumors were reported. Sufficient data was available to calculate the odds ratio (OR) or hazard ratio (HR) and 95% confidence interval (CI).

**Data extraction and synthesis.** Relevant data were meta-analyzed for OS, DFS, RFS and various clinical parameters.

**Results.** The systematic review included 25 studies containing 6,012 patients with solid tumors. Compared to patients with high LKB1 expression, patients with low expression showed significantly shorter OS in univariate analysis (HR = 1.63, 95%CI 1.35-1.97,  $P < 0.01$ ) and multivariate analysis (HR = 1.61, 95%CI 1.26-2.06,  $P < 0.01$ ). In contrast, the two groups showed similar DFS in univariate analysis (HR = 1.49, 95%CI 0.73-3.01,  $P = 0.27$ ) as well as similar RFS in univariate analysis (HR = 1.44, 95%CI 0.65-3.17,  $P = 0.37$ ) and

1  
2  
3  
4 multivariate analysis (HR = 1.02, 95%CI 0.42-2.47,  $P = 0.97$ ). Patients with low LKB1  
5  
6 expression showed significantly worse tumor differentiation (OR = 1.71, 95%CI 1.14-2.55,  $P$   
7  
8  $< 0.01$ ), larger tumors (OR = 1.68, 95%CI 1.24-2.27,  $P < 0.01$ ), earlier lymph node  
9  
10 metastasis (OR = 1.43, 95%CI 1.26-1.62,  $P < 0.01$ ) and more advanced TNM stage (OR =  
11  
12 1.80, 95%CI 1.56-2.07,  $P < 0.01$ ).  
13  
14  
15

16  
17 **Conclusion.** Low LKB1 expression predicts shorter OS, worse tumor differentiation, larger  
18  
19 tumors, earlier lymph node metastasis and more advanced TNM stage. Low LKB1 expression  
20  
21 may be a useful biomarker of poor clinicopathology and prognosis.  
22  
23

24  
25 **Patient and public involvement statement.** This systematic review does not need ethical  
26  
27 approval. Results will be disseminated through conference presentations and publication in a  
28  
29 peer-reviewed, scientific journal.  
30  
31  
32  
33  
34  
35  
36  
37  
38  
39  
40  
41  
42  
43  
44  
45  
46  
47  
48  
49  
50  
51  
52  
53  
54  
55  
56  
57  
58  
59  
60

## Introduction

The serine/threonine kinase liver kinase B1 (LKB1), also known as STK11, was originally observed to be mutated in the genes of patients with Peutz-Jeghers syndrome <sup>1</sup>. LKB1 is often mutated in lung, breast, gastric and other cancers <sup>2-4</sup>. LKB1 plays roles in multiple cellular processes, including cell structure control, cell cycle regulation, apoptosis and cellular metabolism<sup>5-7</sup>. LKB1 phosphorylates multiple substrates, including AMPK, to act as a tumor suppressor to restrict tumorigenesis and metastasis <sup>8</sup>. Mice with a Treg-specific deletion of LKB1 develop a fatal inflammatory disease, and LKB1 in Treg cells acts not through signalling by AMPK or the mammalian target of rapamycin complex1 (mTORC1) and Hif-1, but through signalling involving pd-1 and TNF receptor proteins <sup>9</sup>. LKB1 deficiency can render tumor cells sensitive to metabolic stress, which may turn out to be an anti-tumor strategy <sup>10</sup>.

Although several studies have examined the role of LKB1 in tumor inhibition, its role in the prognosis of solid tumors has not been conclusively determined. Several studies suggest that decreased LKB1 expression indicates poor prognosis. In fact, meta-analysis showed that decreased LKB1 expression in patients with solid tumors may be related to poor prognosis and serve as a predictor of clinicopathological prognostic factors <sup>11</sup>. However, other studies have not reproduced these findings, and some have even suggested that decreased LKB1 may correlate with favorable survival.

Therefore we systematically reviewed and meta-analyzed the relevant literature to understand

1  
2  
3  
4 the current evidence about a relationship between LKB1 expression and prognosis in patients  
5  
6 with solid tumors.  
7  
8  
9

## 11 **Materials and Methods**

### 13 *Literature search strategy*

14  
15  
16  
17 The following databases were searched from database establishment to June 15, 2018 to  
18  
19 identify studies of LKB1 expression and survival in solid tumors: PubMed, Embase, Web of  
20  
21 Science, Cochrane Database, the Chinese National Knowledge Infrastructure, and Wang  
22  
23 Fang. Searches were carried out using terms such as LKB1, STK11, liver kinase B1,  
24  
25 prognosis, prognostic, survival, and overall survival. For example, we searched PubMed  
26  
27 using the following strategy: (LKB1[tw] OR STK11[tw] OR "liver kinase B1"[tw] OR  
28  
29 "serine-threonine kinase 11"[tw]) AND ("prognosis"[MeSH Terms] OR prognoses[tw] OR  
30  
31 prognostic[tw] OR "prognostic factor"[tw] OR "prognostic factors"[tw] OR factor[tw] OR  
32  
33 factors[tw] OR outcome[tw] OR survival[tw] OR metastases[tw] OR metastasis[tw] OR  
34  
35 migration[tw] OR transplantation[tw] OR transfer[tw] OR shift[tw] OR divert[tw] OR  
36  
37 recurrence[tw] OR relapse[tw] OR reappear[tw] OR recur[tw] OR recidivation[tw] OR  
38  
39 invasion[tw]).  
40  
41  
42  
43  
44  
45  
46  
47  
48  
49

### 51 *Study inclusion and exclusion criteria*

52  
53 Studies were considered eligible if they met the following criteria:(1) LKB1expression in  
54  
55 cancer tissue (obtained via surgery or biopsy) was measured by immunohistochemistry or  
56  
57 Western blotting; (2)the association was studied between LKB1 expression and  
58  
59  
60



1  
2  
3  
4 clinicopathological characteristics, overall survival (OS), disease-free survival (DFS), or  
5  
6 recurrence-free survival (RFS) of patients with solid tumors; (3) sufficient data were  
7  
8 published for calculating an odds ratio (OR) or hazard ratio (HR) and 95% confidence  
9  
10 interval (CI); and (4) the study was published as a full-text article in English or Chinese. If  
11  
12 we retrieved multiple studies conducted by the same research group and involving  
13  
14 overlapping patient populations, only the most recent or most complete study was included in  
15  
16 the meta-analysis. Articles were excluded if they (1) were duplicate publications; (2) were  
17  
18 case reports, reviews, letters or animal studies; or (3) did not report survival outcomes.  
19  
20  
21  
22  
23  
24  
25  
26

### 27 *Study quality assessment*

28  
29 Two reviewers independently assessed the quality of included studies using the standard  
30  
31 Newcastle–Ottawa scale (NOS) from 0 to 9. NOS scores of 9-7 were defined as high quality,  
32  
33 6-4 as intermediate quality, and 3-1 as low quality.  
34  
35  
36  
37  
38  
39

### 40 *Data extraction*

41  
42 Two researchers (YHR and FJZ) independently screened all titles and abstracts identified in  
43  
44 the initial search. Articles remaining after this screen were read in full and assessed for  
45  
46 eligibility. The following types of data were extracted: (1) name of first author, publication  
47  
48 year, country, type of cancer and number of patients; (2) patient age, gender, follow-up time,  
49  
50 type of LKB1 assay, intracellular location where LKB1 staining was examined, LKB1 cut-off  
51  
52 value for classifying expression as high or low, survival data (OS, DFS, RFS), statistical  
53  
54 method used to analyze survival data; (3) tumor differentiation, tumor size, lymph node  
55  
56  
57  
58  
59  
60

1  
2  
3  
4 metastasis and tumor stage. All data were cross-checked by two researchers, and  
5  
6 disagreements were resolved by a third reviewer (XMY). If study information was  
7  
8 incomplete or unclear, we contacted the corresponding author in an attempt to collect  
9  
10 accurate information.  
11  
12

### 13 14 15 16 17 *Statistical analysis*

18  
19 Correlation between LKB1 expression and OS of patients with solid tumors was evaluated in  
20  
21 terms of HR and 95%CI. If a study showed Kaplan-Meier survival curves but not HRs with  
22  
23 95%CI, data were extracted from survival curves using Engauge Digitizer 4.1 and the  
24  
25 Tierney  
26  
27 table. Correlation between LKB1 expression and clinicopathological characteristics of  
28  
29 patients with solid tumors was evaluated in terms of OR and 95%CI.  
30  
31  
32  
33

34  
35  
36  
37 HRs and ORs were meta-analyzed using the random-effects model in R software. *P* values  
38  
39 were two-sided and values < 0.05 were considered statistically significant.  
40  
41

42  
43  
44  
45 *I*<sup>2</sup> was used to assess statistical heterogeneity. If *I*<sup>2</sup> > 50%, heterogeneity was considered to  
46  
47 exist among all included studies, and we conducted a subgroup analysis to investigate its  
48  
49 possible source. If *I*<sup>2</sup> < 50%, heterogeneity among all included studies was regarded as  
50  
51 insignificant, and data were directly pooled.  
52  
53  
54

55  
56  
57  
58 To assess the stability of our meta-analysis results, we conducted a sensitivity analysis to  
59  
60

1  
2  
3  
4 testing the influences of individual studies on the pooled HR or *P* value for the remaining  
5  
6 studies. Potential for publication bias was assessed by examining funnel plots, Begg's and  
7  
8 Egger's test of survival data.  
9

## 14 **Results**

15  
16 A total of 4,858 potentially relevant studies were identified in literature searches, of which  
17  
18 3,374 were excluded as duplicate publications. After screening titles and abstracts, 50 studies  
19  
20 were read in full, leading to 25 that were included in the meta-analysis<sup>12-36</sup> (Fig 1). Data from  
21  
22 all 25 studies were meta-analyzed to examine the potential correlation of LKB1 expression  
23  
24 with clinicopathological characteristics. Data from 24 studies were meta-analyzed to examine  
25  
26 the potential correlation between LKB1 expression and OS. Data from five studies were used  
27  
28 to analyze the potential correlation between LKB1 expression and DFS. Four studies reported  
29  
30 the association of LKB1 expression with RFS.  
31  
32  
33  
34  
35  
36

### 37 *Description of studies*

38  
39 The 25 studies in the systematic review involved 6,012 patients from six countries: China,  
40  
41 USA, France, UK, Canada, and Egypt. Data on OS were reported in 24 studies, data on RFS  
42  
43 in five studies, and data on DFS in four studies. Patients covered a range of cancers,  
44  
45 including cancers of the lung, breast, prostate or pancreas; gastric cancer; hepatocellular  
46  
47 carcinoma; esophagus squamous cancer; colorectal cancer; glioma; and laryngeal squamous  
48  
49 cell carcinoma. Tables 1-2 summarize the characteristics of the included studies. Supplement  
50  
51 table 1 lists clinicopathological characteristics and LKB1 expression. Eight studies had an  
52  
53 NOS score of 8; 11 studies, 7; 6 studies, 6; and 3 studies, 5 (supplement table 2 and  
54  
55  
56  
57  
58  
59  
60

1  
2  
3  
4 supplement table 3).  
5  
6  
7  
8

9 Of the 25 studies, 16 reported HRs from multivariate analysis, which we used directly. For  
10 the nine remaining studies, we estimated HRs for OS, DFS, and RFS from survival curves  
11 and Tierney's table.  
12  
13  
14  
15  
16

### 17 18 19 *Association between LKB1 expression and OS*

20  
21  
22 Given heterogeneity among the studies ( $I^2 = 74.0\%$ ,  $P < 0.001$ ), a random-effects model was  
23 used to meta-analyze the data. The pooled HR describing OS for patients with low LKB1  
24 expression relative to OS for patients with high expression is shown in Fig 2. Decreased  
25 LKB1 expression was significantly associated with OS: low expression was associated with  
26 significantly higher risk of poor survival (HR = 1.63, 95%CI 1.35-1.97,  $P < 0.01$ ).  
27  
28  
29  
30  
31  
32  
33  
34  
35  
36

37 To assess the predictive role of decreased LKB1, subgroup analysis was performed after  
38 stratifying the results based on multivariate analysis, type of LKB1 assay, country, cancer  
39 type, and intracellular location of LKB1 staining that was examined. Subgroup analysis based  
40 on multivariate analysis showed that decreased LKB1 expression was related to poor OS in  
41 Table 3 (HR = 1.61, 95%CI 1.26-2.06,  $P < 0.001$  with significant heterogeneity). This  
42 relationship was observed for the following cancer types: lung cancer (HR = 2.07, 95%CI  
43 1.60-2.69,  $P < 0.01$ ,  $I^2 = 0\%$ ), pancreatic cancer (HR = 2.16, 95%CI 1.53-3.05,  $P < 0.001$ ,  $I^2$   
44 = 0%), gastric cancer (HR = 2.11, 95%CI 1.60-3.01,  $P < 0.01$ ,  $I^2 = 0\%$ ), and breast cancer (HR  
45 = 1.26, 95%CI 1.15-1.37,  $P < 0.01$ ). However, this relationship was not observed in the case  
46  
47  
48  
49  
50  
51  
52  
53  
54  
55  
56  
57  
58  
59  
60

1  
2  
3  
4 of hepatocellular carcinoma (HR = 1.27, 95%CI 0.84-1.94,  $P = 0.26$  with significant  
5  
6 heterogeneity).

7  
8  
9  
10  
11 Among Asian patients, decreased LKB1 expression was associated with significantly shorter  
12  
13 OS (HR = 1.70, 95%CI 1.42-2.05,  $P < 0.01$ ); this relationship was not observed among  
14  
15 non-Asian patients (HR = 1.15, 95%CI 0.63-2.08,  $P = 0.65$ ). When the subgroup according to  
16  
17 (Table 3).  
18  
19  
20  
21  
22  
23

24  
25 Pooled HR for the subgroup of patients tested by anti-LKB1 immunohistochemistry was 1.58  
26  
27 (95%CI 1.33–1.88,  $P < 0.01$ ). Low LKB1 expression based on cytoplasmic staining predicted  
28  
29 significant adverse prognosis (HR = 1.78, 95%CI 1.49-2.13,  $P < 0.01$ ). This relationship was  
30  
31 not observed when the judgment of low LKB1 expression was based on nuclear staining (HR  
32  
33 = 1.25, 95%CI 0.85-1.85,  $P = 0.26$ ,  $I^2 = 0\%$ ) (Table 3).  
34  
35  
36  
37  
38  
39  
40

41 Details of the subgroup analysis are listed in Table 3. The results of the sensitivity analysis  
42  
43 showed that the exclusion of each single study did not alter the results significantly (Fig 3).  
44

45 These results suggest that our meta-analysis gave credible results.  
46  
47  
48  
49

#### 50 *Association of LKB1 expression with DFS and RFS*

51  
52  
53 Studies showed significant heterogeneity, so data were meta-analyzed using a random-effect  
54  
55 model. Low LKB1 expression did not show a significant association with RFS based on  
56  
57 univariate analysis (HR = 1.44, 95%CI 0.65-3.17,  $P = 0.37$ ) or multivariate analysis (HR =  
58  
59  
60

1  
2  
3  
4 1.02, 95%CI 0.42-2.47,  $P = 0.97$ ). Similarly, no significant correlation was observed between  
5  
6 LKB1 expression and DFS based on univariate analysis and random-effect meta-analysis  
7  
8 (HR = 1.49, 95%CI 0.73-3.01,  $P = 0.27$ ) (Table 4).  
9  
10

#### 11 12 13 14 *Association between LKB1 expression and clinicopathological characteristics*

15  
16  
17 Meta-analysis of the relationship between LKB1 expression and clinicopathological  
18  
19 characteristics (Table 5) failed to show a significant association of decreased LKB1  
20  
21 expression with age (OR = 0.78, 95%CI 0.57-1.05,  $P = 0.10$ ) or sex (OR = 0.97, 95%CI  
22  
23 0.78-1.19,  $P = 0.76$ ). In contrast, low LKB1 expression was significantly related to worse  
24  
25 differentiation (OR = 1.17, 95%CI 1.14-2.55,  $P < 0.01$ ), deeper invasion (OR = 1.68, 95%CI  
26  
27 1.24-2.27,  $P < 0.01$ ), earlier lymph node metastasis (OR = 1.43, 95%CI 1.26-1.62,  $P < 0.01$ ),  
28  
29 and more advanced clinical stage (OR = 1.80, 95%CI 1.56-2.07,  $P < 0.01$ ).  
30  
31  
32  
33

34  
35 Results are shown as individual and pooled OR with 95% confidence intervals  
36

#### 37 38 *Publication bias*

39  
40 Funnel plots of OS appeared asymmetric (Fig.4), suggesting the possibility of publication  
41  
42 bias among the included studies. However, findings with Begg's ( $P = 0.5402$ ) and Egger's  
43  
44 tests ( $P = 0.2414$ ) implied no publication bias.  
45  
46  
47  
48  
49

## 50 51 **Discussion**

52  
53 This meta-analysis suggests that among patients with many kinds of solid tumors, low LKB1  
54  
55 expression is associated with worse OS, whereas LKB1 expression does not appear to  
56  
57 significantly influence DFS or RFS. This suggests that low LKB1 expression may be a  
58  
59  
60

1  
2  
3  
4 predictor of unfavorable prognosis. In fact, the available evidence suggests an association of  
5  
6 low LKB1 expression with worse tumor differentiation, deeper invasion, more advanced  
7  
8 clinical stages, and earlier metastasis to lymph nodes and other organs. These findings are  
9  
10 consistent with previous conclusions <sup>11</sup>, and they were confirmed in our data set using  
11  
12 sensitivity analysis.  
13  
14  
15  
16  
17  
18

19 Some potentially interesting findings emerged from subgroup analyses conducted after  
20  
21 stratifying the data according to various criteria. Our meta-analysis linked low LKB1  
22  
23 expression with poor prognosis in Asians but not in non-Asians, which may reflect genetic  
24  
25 and environmental differences. While low LKB1 expression was associated with worse  
26  
27 prognosis in patients with certain types of cancer (lung, gastric, pancreatic, breast), this was  
28  
29 not the case in patients with hepatocellular carcinoma. This difference may relate to different  
30  
31 co-morbidities associated with the types of cancer. Lung cancer, stomach cancer, breast  
32  
33 cancer, and pancreatic cancer have high incidence rates around the world, and more studies  
34  
35 have been done. The association between low expression of LKB1 and poor prognosis was  
36  
37 observed when low expression was based on cytoplasmic staining, but not when it was based  
38  
39 on nuclear staining. The reason may be that the regulation of mTORC1 by LKB1 and AMPK  
40  
41 occurs on the exterior of RAB7/LAMP1-positive lysosomal membranes <sup>37</sup>. In this regulation,  
42  
43 LKB1 phosphorylates and activates cell energy-sensing AMPK, which in turn negatively  
44  
45 affects TORC1, which is important for controlling energy metabolism, cell survival and cell  
46  
47 growth under conditions of metabolic stress, such as nutrient deficiency. Further studies are  
48  
49 needed to elucidate the mechanism of action of LKB1.  
50  
51  
52  
53  
54  
55  
56  
57  
58  
59  
60

1  
2  
3  
4  
5  
6  
7 Our meta-analysis suggests that at least in many types of solid tumors, LKB1 acts as a tumor  
8  
9 suppressor. This is consistent with several studies in the literature. For example, a decrease in  
10  
11 LKB1 expression as a result of HBx-mediated p53 inactivation may be responsible for colony  
12  
13 formation and invasiveness in hepatocellular carcinoma <sup>29</sup>. LKB1 deficiency in some tumors  
14  
15 may be associated with up-regulation of glutamate dehydrogenase 1, which activates  
16  
17 CamKK2 and its downstream effector AMPK to increase metastatic potential <sup>38</sup>. LKB1 loss  
18  
19 may drive ovarian serous tumorigenesis by disrupting apical-basal polarity in the presence of  
20  
21 mutated p53 in fallopian tube cells <sup>39</sup>. On the one hand, several studies have suggested an  
22  
23 oncogenic role for LKB1 and AMPK under certain conditions <sup>40</sup>, such as when class III  
24  
25 phosphatidylinositol-3-OH kinase is inactivated <sup>41</sup>. Further work is needed to clarify under  
26  
27 what conditions LKB1 acts as a tumorigenic or tumor-suppressing molecule.  
28  
29  
30  
31  
32  
33  
34  
35  
36  
37

38 The results of our meta-analysis should be interpreted with caution given several limitations.  
39  
40 First, we had to assess OS, DFS and/or RFS from Kaplan-Meier survival curves in several  
41  
42 studies, such that HRs and 95% CIs were estimated indirectly. Second, studies showed  
43  
44 substantial heterogeneity for outcomes, although we did attempt to minimize the effects of  
45  
46 such heterogeneity by using a random-effect meta-analysis model, performing subgroup  
47  
48 analyses and checking results through sensitivity analysis. Third, there is no consensus on  
49  
50 LKB1 cut-off values for defining expression as low or high, which may influence conclusions  
51  
52 about correlations and their clinical significance. Fourth, the funnel plots suggest the potential  
53  
54 for publication bias. This may reflect the generally observed bias toward publication of  
55  
56  
57  
58  
59  
60



1  
2  
3  
4 positive findings. Fifth, our meta-analysis did not account for numerous other factors that  
5  
6 may also affect prognosis, such as co-morbidities and treatment history. In most cases, this  
7  
8 information was not reported in the included studies.  
9  
10

11  
12  
13  
14 Our results justify the design of rigorous in vitro and animal studies designed to explore how  
15  
16 LKB1 influences the prognosis of various types of solid cancers. Ultimately this work should  
17  
18 be extended through human studies, preferentially randomized controlled trials.  
19  
20  
21  
22

## 23 24 **Conclusions**

25  
26  
27 The available evidence links low LKB1 expression with poor prognosis in patients with  
28  
29 various types of solid tumors. This suggests that LKB1 may be a biomarker for various  
30  
31 cancers. These findings should be verified and extended in human studies, and the  
32  
33 mechanisms underlying the association of LKB1 expression and prognosis should be  
34  
35 explored.  
36  
37  
38

39  
40 **Contributors:** XMY and HYM designed the study. FJZ, HYM and RRJ conduct systematic  
41  
42 search, search literature and extract data. YHR analyzed the data. YHR and FJZ wrote the  
43  
44 first draft of the article. JT, XHZ, JLW, QQL and RRH contributed significant knowledge  
45  
46 content and critical expertise and revisions to the manuscript  
47

48 **Funding:** This work was supported by the Graduate Course Construction Project of Guangxi  
49  
50 Medical University (YJSA2017014), the Foundation Ability Enhancement Project for Young  
51  
52 Teachers in Guangxi Universities (2018KY0122, 2017KY0098), the Guangxi Natural  
53  
54 Science Foundation (2018GXNSFBA138018), the Research and Development Program of  
55  
56 Guangxi science and technology department(2017AB45190), the Research and Development  
57  
58 of Appropriate Medical and Health Technology Project in Guangxi (S201417-03), and  
59  
60 Guangxi Health and Family Planning Commission Chinese Medicine Science and

1  
2  
3  
4 Technology Special Subject (GZLC16-36).

5 **Competing interests:** The authors have declared that no competing interests exist.

6  
7 **Patient consent:** Not required.

8  
9 **Provenance and peer review:** Not commissioned, externally peer reviewed.

10  
11 **Data sharing statement:** No additional data are available.

12  
13  
14  
15 Legends:

16  
17 Fig 1. Flow diagram of the eligible studies

18  
19 Fig 2. Forest plot of the association between decrease LKB1 expression and OS

20  
21 Fig 3. Sensitivity analysis of OS in the meta-analysis

22  
23 Fig 4. Funnel plot for the potential publication bias

## References

1. Hemminki A. The molecular basis and clinical aspects of Peutz-Jeghers syndrome. *Cellular and molecular life sciences : CMLS*. May 1999;55(5):735-750.
2. Ji H, Ramsey MR, Hayes DN, et al. LKB1 modulates lung cancer differentiation and metastasis. *Nature*. Aug 16 2007;448(7155):807-810.
3. Zhuang ZG, Di GH, Shen ZZ, et al. Enhanced expression of LKB1 in breast cancer cells attenuates angiogenesis, invasion, and metastatic potential. *Molr Cancer Res: MCR*. Nov 2006;4(11):843-849.
4. Takahashi M, Sakayori M, Takahashi S, et al. A novel germline mutation of the LKB1 gene in a patient with Peutz-Jeghers syndrome with early-onset gastric cancer. *JGastroenterology*. 2004; 39(12): 1210-1214.
5. Amin N, Khan A, St. Johnston D, et al. LKB1 regulates polarity remodeling and adherens junction formation in the Drosophila eye. *Proc Natil Acad Sci*. 2009;106(22):8941-8946.
6. Granot Z, Swisa A, Magenheim J, et al. LKB1 Regulates Pancreatic  $\beta$  Cell Size, Polarity, and Function. *Cell Metab*. 2009;10(4):296-308.
7. Kullmann L, Krahn MP. Controlling the master—upstream regulation of the tumor suppressor LKB1. *Oncogene*. 2018;37(23):3045-57.
8. Shackelford DB, Shaw RJ. The LKB1-AMPK pathway: metabolism and growth control in tumour suppression. *Nat Rev Cancer*. Aug 2009;9(8):563-575.
9. Yang K, Blanco DB, Neale G, et al. Homeostatic control of metabolic and functional fitness of Treg cells by LKB1 signalling. *Nature*. 2017;548(7669):602-606.
10. Parker SJ, Svensson RU, Divakaruni AS, et al. LKB1 promotes metabolic flexibility in response to energy stress. *Metab Eng*. Sep 2017;43(Pt B):208-217.
11. Xiao J, Zou Y, Chen X, et al. The Prognostic Value of Decreased LKB1 in Solid Tumors: A Meta-Analysis. *PloS one*. 2016;11(4):e0152674.
12. Ding XM, Li ZP, et al. Expression and clinical significance of LKB1 protein in lung adenocarcinoma tissues. *Chin J Cancer Prev T Rea T*, September 2005, 12(17):1281-1284.
13. Tsai LH, Chen PM, Cheng YW, et al. LKB1 loss by alteration of the NKX2-1/p53 pathway promotes tumor malignancy and predicts poor survival and relapse in lung adenocarcinomas. *Oncogene*. Jul 17 2014;33(29):3851-3860.
14. Jiang L, Liang X, et al. Reduced expression of liver kinase B1 and Beclin1 is associated with the poor survival of patients with non-small cell lung cancer. *Oncol Rep*. 2014;32(5):1931-1938.
15. Calles A, Sholl LM, Rodig SJ, et al. Immunohistochemical Loss of LKB1 Is a Biomarker for More Aggressive Biology in KRAS-Mutant Lung Adenocarcinoma. *Clini Cancer Res*. Jun 15 2015;21(12):2851-2860.
16. Shen Z, Wen XF, et al. The Tumor Suppressor Gene LKB1 Is Associated with Prognosis in Human Breast Carcinoma. *Clini Cancer Res*. 2002;8(7):2085-2090.
17. Bouchekioua-Bouzaghrou K, Poulard C, Rambaud J, et al. LKB1 when associated with methylatedERalpha is a marker of bad prognosis in breast cancer. *Int JCancer*. Sep 15 2014;135(6):1307-1318.
18. Chen IC, Chang YC, Lu YS, et al. Clinical Relevance of Liver Kinase B1(LKB1) Protein and Gene Expression in Breast Cancer. *Sci Rep*. Feb 15 2016;6:21374.
19. Azim HA, Kassem L, Treilleux I, et al. Analysis of PI3K/mTOR Pathway Biomarkers and Their Prognostic Value in Women with Hormone Receptor-Positive, HER2-Negative Early Breast Cancer. *Transl Oncol*.

- 1  
2  
3  
4 Apr 2016;9(2):114-123.
- 5 20. Morton JP, Jamieson NB, Karim SA, et al. LKB1 haploinsufficiency cooperates with Kras to promote  
6 pancreatic cancer through suppression of p21-dependent growth arrest. *Gastroenterology*. Aug  
7 2010;139(2):586-597, 597 e1-6.
- 8 21. Yang JY, Jiang SH, Liu DJ, et al. Decreased LKB1 predicts poor prognosis in Pancreatic Ductal  
9 Adenocarcinoma. *Sci Rep*. May 27 2015;5:10575.
- 10 22. Yang XW, Lin T, et al. Expression of LKB1 protein in gastric cancer tissue and its clinical significance.  
11 *Chin Arch Gen Surg*. 2012; 6:51-56.
- 12 23. Li D, Zhou Y, Liu Y, et al. Decreased expression of LKB1 predicts poor prognosis in pancreatic  
13 neuroendocrine tumor patients undergoing curative resection. *Oncol Targets Ther*.  
14 2018;11:1259-1265.
- 15 24. Huang Y, Xia L, et al. Expression of LKB1 and vascular endothelial growth factor in gastric cancer tissue  
16 and its clinical significance. *Pract Geriatr*. 2014;28(9):734-737.
- 17 25. Ma LG, Bian SB, Cui JX, et al. LKB1 inhibits the proliferation of gastric cancer cells by suppressing the  
18 nuclear translocation of Yap and beta-catenin. *Int JMol Med*. Apr 2016;37(4):1039-1048.
- 19 26. Yin M, Bian SB, et al. Expression and clinical significance of LKB1 and ZEB1 in gastric cancer tissues.  
20 *Guizhou Med*. 2017;41(10):1021-1024.
- 21 27. Huang YH, Chen ZK, Huang KT, et al. Decreased Expression of LKB1 Correlates with Poor Prognosis in  
22 Hepatocellular Carcinoma Patients Undergoing Hepatectomy. *Asian Pac J Cancer Prev*.  
23 2013;14(3):1985-1988.
- 24 28. Lee SW, Li CF, et al. Skp2-dependent ubiquitination and activation of LKB1 is essential for cancer cell  
25 survival under energy stress. *Mol Cell*, 2015; 57(6): 1022-33.
- 26 29. Wu CC, Wu DW, et al. Hepatitis B virus X protein represses LKB1 expression to promote tumor  
27 progression and poor postoperative outcome in hepatocellular carcinoma. *Surgery*, 2018. 163(5): p.  
28 1040-1046.
- 29 30. Wang J, Zhang K, et al. Underexpression of LKB1 tumor suppressor is associated with enhanced Wnt  
30 signaling and malignant characteristics of human intrahepatic cholangiocarcinoma. *Oncotarget*, 2015.  
31 6(22): p. 18906-18920.
- 32 31. Ma JJ, Du YM, et al. Expression and significance of LKB1 protein in esophageal squamous cell  
33 carcinoma. *Medicine and Philosophy*, 2014. 35(2B): p. 65-68.
- 34 32. He TY, Tsai LH, et al. LKB1 loss at transcriptional level promotes tumor malignancy and poor patient  
35 outcomes in colorectal cancer. *Ann Surg Oncol*, 2014. 21 Suppl 4: p. S703-710.
- 36 33. Lu J, Sun P, et al. Low LKB1 Expression Results in Unfavorable Prognosis in Prostate Cancer Patients.  
37 *Med Sci Monit*, 2015. (30)21: p. 3722-3727.
- 38 34. Huang J, Chen HW, et al. Downregulation of LKB1 promotes tumor progression and predicts  
39 unfavorable prognosis in patients with glioma. *Oncol Lett*, 2017. 13(3): p. 1688-1694.
- 40 35. He SS, Chen Y, et al. Loss of LKB1 Expression Decreases the Survival and Promotes Laryngeal Cancer  
41 Metastasis. *J Cancer*, 2017. 8(17): p. 3548-3554.
- 42 36. Sun J, Ling B, et al. Decreased Expression of Tumor-suppressor Gene LKB1 Correlates with Poor  
43 Prognosis in Human Gastric Cancer. *Anticancer Res*, 2016. 36(3): p. 869-876.
- 44 37. Zhang CS, Jiang B, Li M, et al. The lysosomal v-ATPase-Ragulator complex is a common activator for  
45 AMPK and mTORC1, acting as a switch between catabolism and anabolism. *Cell Metab*. Sep 2  
46  
47  
48  
49  
50  
51  
52  
53  
54  
55  
56  
57  
58  
59  
60

- 1  
2  
3 2014;20(3):526-540.
- 4 38. Jin L, Chun J, Pan C, et al. The PLAG1-GDH1 Axis Promotes Anoikis Resistance and Tumor Metastasis  
5 through CamKK2-AMPK Signaling in LKB1-Deficient Lung Cancer. *Mol cell*. 2018;69(1):87-99.e87  
6
- 7 39. George SH, Milea A, Sowamber R, Chehade R, Tone A, Shaw PA. Loss of LKB1 and p53 synergizes to  
8 alter fallopian tube epithelial phenotype and high-grade serous tumorigenesis. *Oncogene*. Jan 7  
9 2016;35(1):59-68.  
10
- 11 40. Hardie DG, Alessi DR. LKB1 and AMPK and the cancer-metabolism link - ten years after. *BMC biology*.  
12 Apr 15 2013;11:36.  
13
- 14 41. O'Farrell F, Lobert VH, Sneeggen M, et al. Class III phosphatidylinositol-3-OH kinase controls epithelial  
15 integrity through endosomal LKB1 regulation. *Nature cell biology*. Dec 2017;19(12):1412-1423.  
16  
17  
18  
19  
20  
21  
22  
23  
24  
25  
26  
27  
28  
29  
30  
31  
32  
33  
34  
35  
36  
37  
38  
39  
40  
41  
42  
43  
44  
45  
46  
47  
48  
49  
50  
51  
52  
53  
54  
55  
56  
57  
58  
59  
60

For peer review only

**Table 1.** Main characteristics of included studies and Newcastle-Ottawa scale scores.

| Study                        | Year | Country          | Type of cancer                      | No. cases |      | Age in year,<br>median(range) | Follow-up,<br>mo. | NOS<br>score |
|------------------------------|------|------------------|-------------------------------------|-----------|------|-------------------------------|-------------------|--------------|
|                              |      |                  |                                     | Low       | High |                               |                   |              |
|                              |      |                  |                                     | LKB1      | LKB1 |                               |                   |              |
| Ding XM                      | 2005 | China            | Lung<br>adenocarcinoma              | 24        | 38   | 60.5(32-77)                   | 80                | 7            |
| Tsai LH                      | 2013 | China            | Lung<br>adenocarcinomas             | 44        | 71   | NR                            | 140               | 7            |
| Jiang LL                     | 2014 | China            | Non-small cell<br>lung cancer       | 33        | 109  | 58.2(31-84)                   | 71                | 7            |
| Calles A                     | 2015 | USA              | Lung<br>adenocarcinoma              | 42        | 84   | 63.5(30-84)                   | 60                | 7            |
| Shen Z                       | 2002 | China            | Breast carcinoma                    | 38        | 83   | 53.7(32-77)                   | 70                | 6            |
| Bouchekioua-<br>Bouzaghrou K | 2014 | France           | Breast cancer                       | 94        | 60   | 56.87(27-87)                  | 162               | 7            |
| Bouchekioua-<br>Bouzaghrou K | 2014 | France           | Breast cancer                       | 102       | 52   | 56.5 (27-87)                  | 162               |              |
| Chen IC                      | 2016 | China            | Breast cancer                       | 161       | 408  | 48                            | 120               | 6            |
| Chen IC                      | 2016 | China            | Breast cancer                       | 88        | 189  | 54                            | 120               |              |
| Chen IC                      | 2016 | UK and<br>Canada | Breast cancer                       | 494       | 494  | 61.3                          | 300               | 5            |
| Chen IC                      | 2016 | UK and<br>Canada | Breast cancer                       | 488       | 487  | 62.6                          | 300               |              |
| HamdyA.Azi<br>m              | 2016 | Egypt            | Breast Cancer                       | 12        | 20   | 51.3(25-82)                   | 82.8              | 6            |
| HamdyA.Azi<br>m              | 2016 | Egypt            | Breast Cancer                       | 11        | 21   | 51.3(25-82)                   | 82.8              |              |
| Morton JP                    | 2010 | UK               | Pancreatic cancer                   | 20        | 86   | NR                            | 95                | 7            |
| Yang JY                      | 2015 | China            | Pancreatic ductal<br>adenocarcinoma | 36        | 169  | NR                            | 97                | 8            |

|    |          |      |       |                   |     |     |             |       |   |
|----|----------|------|-------|-------------------|-----|-----|-------------|-------|---|
| 1  |          |      |       |                   |     |     |             |       |   |
| 2  |          |      |       |                   |     |     |             |       |   |
| 3  | Li DZ    | 2018 | China | Pancreatic        | 38  | 33  | NR          | 190   | 8 |
| 4  |          |      |       | neuroendocrine    |     |     |             |       |   |
| 5  |          |      |       | tumor             |     |     |             |       |   |
| 6  |          |      |       |                   |     |     |             |       |   |
| 7  |          |      |       |                   |     |     |             |       |   |
| 8  | Yang XW  | 2012 | China | Gastric Cancer    | 76  | 24  | 65(31-85)   | 38    | 7 |
| 9  | Huang Y  | 2014 | China | Gastric           | 24  | 91  | 61(37-80)   | 75    | 6 |
| 10 |          |      |       | carcinoma         |     |     |             |       |   |
| 11 |          |      |       |                   |     |     |             |       |   |
| 12 | Ma LG    | 2016 | China | Gastric Cancer    | 62  | 47  | 57(31-84)   | 99    | 8 |
| 13 |          |      |       |                   |     |     |             |       |   |
| 14 | Sun JJ   | 2016 | China | Gastric Cancer    | 107 | 48  | NR          | 70    | 6 |
| 15 | Yin M    | 2017 | China | Gastric Cancer    | 78  | 32  | 62(23-79)   | 72    | 7 |
| 16 |          |      |       |                   |     |     |             |       |   |
| 17 | Huang YH | 2013 | China | Hepatocellular    | 31  | 39  | 57(43-72)   | 68    | 7 |
| 18 |          |      |       | carcinoma         |     |     |             |       |   |
| 19 |          |      |       |                   |     |     |             |       |   |
| 20 | Lee SW   | 2015 | China | Hepatocellular    | 13  | 27  | NR          | 101   | 7 |
| 21 |          |      |       | carcinoma         |     |     |             |       |   |
| 22 |          |      |       |                   |     |     |             |       |   |
| 23 | Wu CC    | 2018 | China | Hepatocellular    | 41  | 52  | NR          | 54    | 7 |
| 24 |          |      |       | carcinoma         |     |     |             |       |   |
| 25 |          |      |       |                   |     |     |             |       |   |
| 26 | Wang JH  | 2015 | China | Intrahepatic      | 187 | 129 | NR          | 99    | 8 |
| 27 |          |      |       | cholangiocarcino  |     |     |             |       |   |
| 28 |          |      |       | ma                |     |     |             |       |   |
| 29 |          |      |       |                   |     |     |             |       |   |
| 30 | Ma JJ    | 2014 | China | Esophagus         | 73  | 47  | NR          | 60    | 8 |
| 31 |          |      |       | squamous          |     |     |             |       |   |
| 32 |          |      |       | cancer            |     |     |             |       |   |
| 33 |          |      |       |                   |     |     |             |       |   |
| 34 |          |      |       |                   |     |     |             |       |   |
| 35 | He TY    | 2014 | China | Colorectal cancer | 63  | 95  | NR          | 80.5  | 5 |
| 36 | Lu JL    | 2015 | China | Prostate Cancer   | 78  | 31  | NR          | 60    | 7 |
| 37 |          |      |       |                   |     |     |             |       |   |
| 38 | Huang JH | 2017 | China | Glioma            | 92  | 88  | 50.8(10-86) | 118   | 8 |
| 39 | He SS    | 2017 | China | Laryngeal         | 128 | 80  | NR          | 212.2 | 8 |
| 40 |          |      |       | squamous cell     |     |     |             |       |   |
| 41 |          |      |       | carcinoma         |     |     |             |       |   |
| 42 |          |      |       |                   |     |     |             |       |   |
| 43 |          |      |       |                   |     |     |             |       |   |

44 NR: No resources

45  
46  
47  
48  
49  
50  
51  
52  
53  
54  
55  
56  
57  
58  
59  
60

1  
2  
3  
4  
5  
6  
7  
8  
9  
10  
11  
12  
13  
14  
15  
16  
17  
18  
19  
20  
21  
22  
23  
24  
25  
26  
27  
28  
29  
30  
31  
32  
33  
34  
35  
36  
37  
38  
39  
40  
41  
42  
43  
44  
45  
46  
47  
48  
49  
50  
51  
52  
53  
54  
55  
56  
57  
58  
59  
60**Table 2.** LKB1 expression levels and survival.

| Study                   | Assay method    | Staining location          | Cut-off value                                                       | Outcome | Analysis method | HR and 95%CI       |
|-------------------------|-----------------|----------------------------|---------------------------------------------------------------------|---------|-----------------|--------------------|
| Ding XM                 | IHC             | Both nucleus and cytoplasm | Lower than in normal airway epithelium                              | OS      | UA              | 3.003(1.524-5.865) |
| Isai LH                 | IHC             | No specific description    | A score equal to or lower than 100                                  | OS      | UA              | 1.846(1.147-2.952) |
|                         |                 |                            |                                                                     |         | MA              | 1.868(1.160-3.007) |
|                         |                 |                            |                                                                     | RFS     | UA              | 1.828(1.247-3.122) |
|                         |                 |                            |                                                                     |         | MA              | 1.791(1.132-2.834) |
| Jiang LL                | IHC             | Cytoplasm                  | Score of 0-4                                                        | OS      | UA              | 3.226(1.856-5.586) |
|                         |                 |                            |                                                                     |         | MA              | 2.128(1.136-4.000) |
| Galles A                | IHC             | Cytoplasm                  | No staining                                                         | OS      | UA              | 1.440(0.910-2.270) |
| Shen Z                  | WB              | Total protein              | Bands of the breast cancer tissue in which the quantities were <0.5 | OS      | UA              | 3.754(1.583-8.932) |
|                         |                 |                            |                                                                     | DFS     | UA              | 2.529(1.383-5.933) |
| Bouchekioua-Beuzaghou K | IHC             | Cytoplasm                  | Staining intensity recorded as 0-1                                  | OS      | UA              | 0.418(0.211-0.828) |
|                         |                 |                            |                                                                     |         | MA              | 0.403(0.199-0.820) |
|                         |                 |                            |                                                                     | DFS     | UA              | 0.495(0.249-0.809) |
|                         |                 |                            |                                                                     |         | MA              | 0.549(0.303-0.990) |
| Bouchekioua-Beuzaghou K | IHC             | nucleus                    | Staining intensity recorded as 0                                    | OS      | UA              | 1.417(0.722-2.734) |
|                         |                 |                            |                                                                     | DFS     | UA              | 1.278(0.732-2.225) |
| Chen IC                 | IHC             | No specific description    | A score of 0 or 1                                                   | OS      | UA              | 1.200(0.670-2.150) |
|                         |                 |                            |                                                                     |         | MA              | 0.766(0.453-1.296) |
| Chen IC                 | IHC             | No specific description    | A score of 0 or 1                                                   | OS      | UA              | 0.980(0.600-1.610) |
|                         |                 |                            |                                                                     |         | MA              | 1.054(0.665-1.671) |
| Chen IC                 | microarray data | No specific description    | Lower than the median expression level                              | OS      | UA              | 1.600(1.360-1.894) |
|                         |                 |                            |                                                                     |         | MA              | 0.937(0.772-1.138) |
| Chen IC                 | microarray data | No specific description    | Lower than the median expression level                              | OS      | UA              | 1.090(0.910-1.300) |
|                         |                 |                            |                                                                     |         | MA              | 1.024(0.839-1.250) |



|    |               |     |                            |                                                                        |     |    |                      |
|----|---------------|-----|----------------------------|------------------------------------------------------------------------|-----|----|----------------------|
| 1  |               |     |                            |                                                                        |     |    |                      |
| 2  |               |     |                            |                                                                        |     |    |                      |
| 3  | Hamdy A. Azim | IHC | Cytoplasm                  | Staining intensity recorded as 0                                       | RFS | UA | 1.110(0.160-7.490)   |
| 4  |               |     |                            |                                                                        |     | MA | 0.810(0.220-3.030)   |
| 5  |               |     |                            |                                                                        |     |    |                      |
| 6  | Hamdy A. Azim | IHC | Nucleus                    | Staining intensity recorded as 0                                       | RFS | UA | 5.220(0.23-118.460)  |
| 7  |               |     |                            |                                                                        |     | MA | 0.360(0.150-0.100)   |
| 8  |               |     |                            |                                                                        |     |    |                      |
| 9  | Morton JP     | IHC | Cytoplasm                  | Histoscore was $\leq 100$                                              | OS  | UA | 1.877(1.020-3.448)   |
| 10 |               |     |                            |                                                                        |     | MA | 1.870(1.090-3.220)   |
| 11 |               |     |                            |                                                                        |     |    |                      |
| 12 | Yang JY       | IHC | No specific description    | A total score $< 4$                                                    | OS  | UA | 2.278(1.495-3.472)   |
| 13 |               |     |                            |                                                                        |     | MA | 1.845(1.189-2.856)   |
| 14 |               |     |                            |                                                                        |     |    |                      |
| 15 |               |     |                            |                                                                        |     |    |                      |
| 16 | Li DZ         | IHC | Cytoplasm                  | Strong immunostaining in $\leq 50\%$ of the cells and/or weak staining | OS  | UA | 5.310(0.200-142.482) |
| 17 |               |     |                            |                                                                        | DFS | UA | 2.190(0.410-11.700)  |
| 18 |               |     |                            |                                                                        |     |    |                      |
| 19 |               |     |                            |                                                                        |     |    |                      |
| 20 |               |     |                            |                                                                        |     |    |                      |
| 21 |               |     |                            |                                                                        |     |    |                      |
| 22 |               |     |                            |                                                                        |     |    |                      |
| 23 | Yang XW       | IHC | Both nucleus and cytoplasm | Staining intensity in the neoplasm less than that in normal mucosa     | OS  | UA | 2.558(1.554-4.233)   |
| 24 |               |     |                            |                                                                        |     |    |                      |
| 25 |               |     |                            |                                                                        |     |    |                      |
| 26 |               |     |                            |                                                                        |     |    |                      |
| 27 | Huang Y       | IHC | Both nucleus and cytoplasm | Staining intensity recorded as 0-1                                     | OS  | UA | 2.514(1.260-5.022)   |
| 28 |               |     |                            |                                                                        |     |    |                      |
| 29 |               |     |                            |                                                                        |     |    |                      |
| 30 |               |     |                            |                                                                        |     |    |                      |
| 31 |               |     |                            |                                                                        |     |    |                      |
| 32 | Ma LG         | IHC | Both nucleus and cytoplasm | Scores $\leq 1$                                                        | OS  | UA | 2.310(1.250-4.270)   |
| 33 |               |     |                            |                                                                        |     |    |                      |
| 34 |               |     |                            |                                                                        |     |    |                      |
| 35 |               |     |                            |                                                                        |     | MA | 3.527(1.491-10.630)  |
| 36 | Sun JJ        | IHC | Both nucleus and cytoplasm | Scores of 0 and 1+ indicate negative result                            | OS  | UA | 1.450(0.540-3.900)   |
| 37 |               |     |                            |                                                                        |     |    |                      |
| 38 |               |     |                            |                                                                        |     |    |                      |
| 39 |               |     |                            |                                                                        |     | MA | 4.431(1.363-14.407)  |
| 40 |               |     |                            |                                                                        |     |    |                      |
| 41 | Yin M         | IHC | Both nucleus and cytoplasm | Staining intensity recorded as 0-1                                     | OS  | UA | 1.070(0.460-2.470)   |
| 42 |               |     |                            |                                                                        |     |    |                      |
| 43 |               |     |                            |                                                                        |     |    |                      |
| 44 | Liang YH      | IHC | Cytoplasm                  | Staining index score $\leq 3$                                          | OS  | UA | 3.155(1.603-6.211)   |
| 45 |               |     |                            |                                                                        |     | MA | 2.179(1.066-4.44)    |
| 46 |               |     |                            |                                                                        |     |    |                      |
| 47 |               |     |                            |                                                                        | DFS | UA | 2.737(1.629-6.271)   |
| 48 |               |     |                            |                                                                        |     |    |                      |
| 49 | Lee SW        | IHC | Both nucleus and cytoplasm | H-score was lower than the median                                      | OS  | UA | 0.517(0.284-0.931)   |
| 50 |               |     |                            |                                                                        |     |    |                      |
| 51 |               |     |                            |                                                                        |     | MA | 0.333(0.193-0.564)   |
| 52 |               |     |                            |                                                                        |     |    |                      |
| 53 | Wu CC         | IHC | No specific description    | Histoscore was $\leq 150$                                              | OS  | UA | 3.130(0.910-10.840)  |
| 54 |               |     |                            |                                                                        |     |    |                      |
| 55 |               |     |                            |                                                                        |     | MA | 4.260(1.870-9.690)   |
| 56 |               |     |                            |                                                                        |     |    |                      |
| 57 |               |     |                            |                                                                        | RFS | UA | 2.020(0.870-4.720)   |
| 58 |               |     |                            |                                                                        |     |    |                      |
| 59 |               |     |                            |                                                                        |     | MA | 2.050(1.110-3.810)   |
| 60 |               |     |                            |                                                                        |     |    |                      |

1  
2  
3  
4  
5  
6  
7  
8  
9  
10  
11  
12  
13  
14  
15  
16  
17  
18  
19  
20  
21  
22  
23  
24  
25  
26  
27  
28  
29  
30  
31  
32  
33  
34  
35  
36  
37  
38  
39  
40  
41  
42  
43  
44  
45  
46  
47  
48  
49  
50  
51  
52  
53  
54  
55  
56  
57  
58  
59  
60

|         |     |                            |                                                                                |     |    |                     |
|---------|-----|----------------------------|--------------------------------------------------------------------------------|-----|----|---------------------|
| Wang JH | IHC | Cytoplasm                  | Staining density lower than the median value                                   | OS  | UA | 1.857(1.438–2.386)  |
|         |     |                            |                                                                                |     | MA | 1.824(1.404–2.377)  |
| Ma JJ   | IHC | Both nucleus and cytoplasm | Score of 0–4                                                                   | OS  | UA | 0.570(0.330-0.980)  |
| He TY   | IHC | No specific description    | Score equal to or lower than 100                                               | OS  | UA | 2.364(1.466-3.812)  |
|         |     |                            |                                                                                |     | MA | 3.146(1.876-5.276)  |
|         |     |                            |                                                                                | RFS | UA | 2.522(1.701-4.445)  |
|         |     |                            |                                                                                |     | MA | 3.093(1.843-5.191)  |
| Lu JL   | IHC | No specific description    | Staining of fewer than 20% of the tissue cells or no staining                  | OS  | UA | 6.310(0.420-94.730) |
|         |     |                            |                                                                                |     | MA | 3.981(1.698–9.336)  |
| Wang JH | IHC | No specific description    | Percentage of positive cells $\leq$ 35%and/or staining intensity score of 0-1. | OS  | UA | 3.350(1.490-7.510)  |
|         |     |                            |                                                                                |     | MA | 3.022(1.002-6.016)  |
| Li SS   | IHC | Nucleus                    | Score $\leq$ 4                                                                 | OS  | UA | 1.170(0.720-1.900)  |
|         |     |                            |                                                                                |     | MA | 1.628(1.060–2.500)  |

Table 3. Subgroup analyses of the association between LKB1 expression and OS after stratification by statistical analysis method, LKB1 assay method, region, cancer type, and intracellular staining location.

| Stratification criterion | Value                      | HR(95%CI)       | P value | Heterogeneity  |         |
|--------------------------|----------------------------|-----------------|---------|----------------|---------|
|                          |                            |                 |         | I <sup>2</sup> | P value |
| Analysis method          | Univariate                 | 1.63(1.35-1.97) | <0.001  | 74%            | <0.001  |
|                          | Multivariate               | 1.61(1.26-2.06) | <0.001  | 81%            | <0.001  |
| Assay method             | IHC                        | 1.58(1.33-1.88) | <0.001  | 76%            | <0.001  |
| Region                   | Asian                      | 1.70(1.42-2.05) | <0.001  | 77%            | <0.001  |
|                          | Not Asian                  | 1.15(0.63-2.08) | 0.65    | 75%            | 0.007   |
| Cancer type              | Lung                       | 2.07(1.60-2.69) | <0.001  | 53%            | 0.09    |
|                          | Breast                     | 1.26(1.15-1.37) | <0.001  | 79%            | <0.001  |
|                          | Gastric                    | 2.11(1.60-3.01) | <0.001  | 0%             | 0.41    |
|                          | Pancreatic                 | 2.16(1.53-3.05) | <0.001  | 0%             | 0.76    |
|                          | Hepatocellular carcinoma   | 1.27(0.84-1.94) | 0.26    | 89%            | <0.001  |
| Staining position        | The others                 | 1.63(1.35-1.96) | <0.001  | 79%            | <0.001  |
|                          | Both nucleus and cytoplasm | 1.50(1.31-1.17) | <0.001  | 80%            | <0.001  |
|                          | Cytoplasm                  | 1.78(1.49-2.13) | <0.001  | 77%            | <0.001  |
|                          | Nucleus                    | 1.25(0.85-1.85) | 0.26    | 0%             | 0.65    |
|                          | The others                 | 1.36(1.25-1.47) | <0.001  | 75%            | <0.001  |
| NOS scores               | High quality               | 1.53(1.19-1.96) | <0.001  | 77%            | <0.001  |
|                          | Intermediate quality       | 1.79(1.36-1.92) | <0.001  | 75%            | <0.001  |

Table 4. Meta-analysis results of decreased LKB1 expression and patient's prognosis

| prognosis | Analysis method       | HR(95%CI)       | <i>P</i> value   | Hetherogeneity        |                  |
|-----------|-----------------------|-----------------|------------------|-----------------------|------------------|
|           |                       |                 |                  | <i>I</i> <sup>2</sup> | <i>P</i> value   |
| OS        | Univariate analysis   | 1.63(1.35-1.97) | <i>P</i> < 0.01  | 74.0%                 | <i>P</i> < 0.001 |
|           | Multivariate analysis | 1.61(1.26–2.06) | <i>P</i> < 0.001 | 81.0%                 | <i>P</i> < 0.001 |
| RFS       | Univariate analysis   | 1.44(0.65-3.17) | <i>P</i> = 0.37  | 85%                   | <i>P</i> < 0.001 |
|           | Multivariate analysis | 1.02(0.42-2.47) | <i>P</i> = 0.97  | 95%                   | <i>P</i> < 0.001 |
| DFS       | Univariate analysis   | 1.49(0.73-3.01) | <i>P</i> = 0.27  | 78%                   | <i>P</i> = 0.001 |

For peer review only

Table 5. Meta-analysis of the association of decreased LKB1 expression with clinicopathological characteristics

|                                   | OR(95%CI)       | <i>P</i> value  | Heterogeneity |                       |                |
|-----------------------------------|-----------------|-----------------|---------------|-----------------------|----------------|
|                                   |                 |                 | Q test        | <i>I</i> <sup>2</sup> | <i>P</i> value |
| Age( $\geq 60$ , $< 60$ )         | 0.78(0.57-1.05) | <i>P</i> = 0.10 | 4.04          | 0%                    | 0.78           |
| Sex(Male, Female)                 | 0.97(0.78-1.19) | <i>P</i> = 0.76 | 9.06          | 0%                    | 0.77           |
| Tumor differentiation(Poor, Well) | 1.17(1.14-2.55) | <i>P</i> < 0.01 | 59.5          | 75%                   | <0.001         |
| Tumor size(T3-T4, T1-T2)          | 1.68(1.24-2.27) | <i>P</i> < 0.01 | 43.34         | 61%                   | <0.001         |
| Lymph node metastasis(Yes, No)    | 1.43(1.26-1.62) | <i>P</i> < 0.01 | 58.41         | 74%                   | <0.001         |
| TNM stage(III-IV, I - II)         | 1.80(1.56-2.07) | <i>P</i> < 0.01 | 88.8          | 81%                   | <0.001         |

1  
2  
3  
4  
5  
6  
7  
8  
9  
10  
11  
12  
13  
14  
15  
16  
17  
18  
19  
20  
21  
22  
23  
24  
25  
26  
27  
28  
29  
30  
31  
32  
33  
34  
35  
36  
37  
38  
39  
40  
41  
42  
43  
44  
45  
46  
47  
48  
49  
50  
51  
52  
53  
54  
55  
56  
57  
58  
59  
60

For peer review only

1  
2  
3  
4  
5  
6  
7  
8  
9  
10  
11  
12  
13  
14  
15  
16  
17  
18  
19  
20  
21  
22  
23  
24  
25  
26  
27  
28  
29  
30  
31  
32  
33  
34  
35  
36  
37  
38  
39  
40  
41  
42  
43  
44  
45  
46  
47  
48  
49  
50  
51  
52  
53  
54  
55  
56  
57  
58  
59  
60

For peer review only

1  
2  
3  
4  
5  
6  
7  
8  
9  
10  
11  
12  
13  
14  
15  
16  
17  
18  
19  
20  
21  
22  
23  
24  
25  
26  
27  
28  
29  
30  
31  
32  
33  
34  
35  
36  
37  
38  
39  
40  
41  
42  
43  
44  
45  
46  
47  
48  
49  
50  
51  
52  
53  
54  
55  
56  
57  
58  
59  
60

For peer review only



1  
2  
3  
4  
5  
6  
7  
8  
9  
10  
11  
12  
13  
14  
15  
16  
17  
18  
19  
20  
21  
22  
23  
24  
25  
26  
27  
28  
29  
30  
31  
32  
33  
34  
35  
36  
37  
38  
39  
40  
41  
42  
43  
44  
45  
46  
47  
48  
49  
50  
51  
52  
53  
54  
55  
56  
57  
58  
59  
60

For peer review only

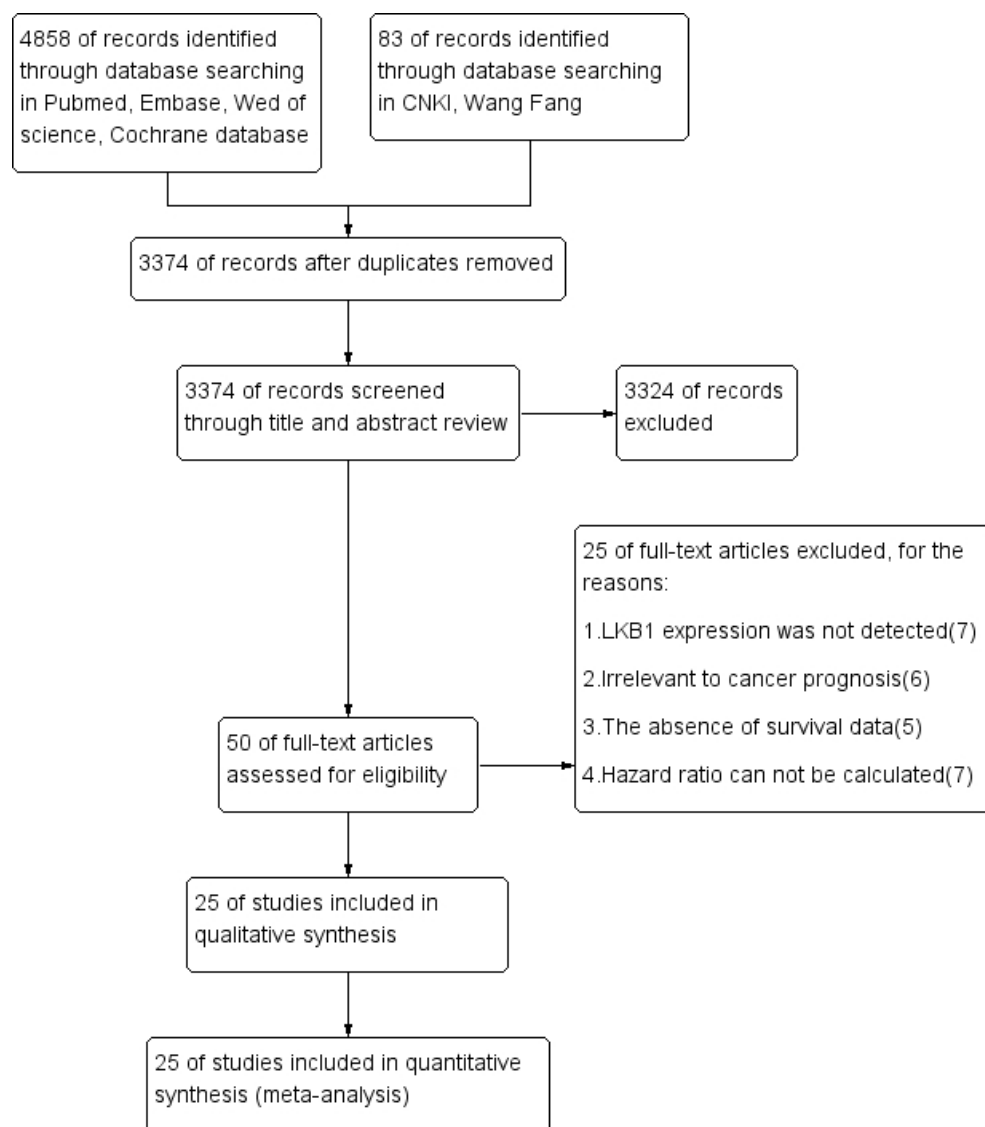

Fig 1. Flow diagram of the eligible studies

Fig 1. Flow diagram of the eligible studies

1  
2  
3  
4  
5  
6  
7  
8  
9  
10  
11  
12  
13  
14  
15  
16  
17  
18  
19  
20  
21  
22  
23  
24  
25  
26  
27  
28  
29  
30  
31  
32  
33  
34  
35  
36  
37  
38  
39  
40  
41  
42  
43  
44  
45  
46  
47  
48  
49  
50  
51  
52  
53  
54  
55  
56  
57  
58  
59  
60

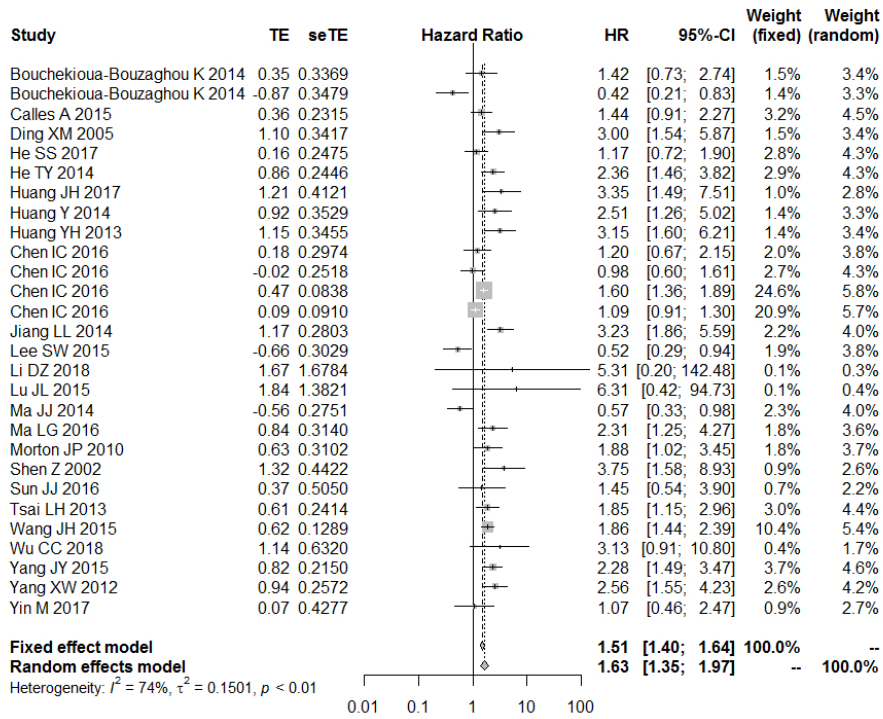

Fig 2. Forest plot of the association between decrease LKB1 expression and OS.

Fig 2. Forest plot of the association between decrease LKB1 expression and OS

257x211mm (96 x 96 DPI)

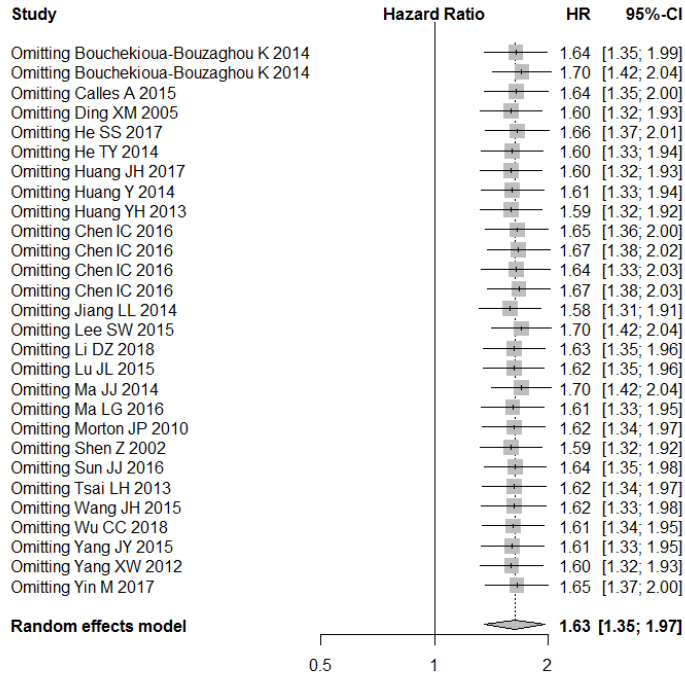

Fig 3. Sensitivity analysis of OS in the meta-analysis

Fig 3. Sensitivity analysis of OS in the meta-analysis

257x211mm (96 x 96 DPI)

1  
2  
3  
4  
5  
6  
7  
8  
9  
10  
11  
12  
13  
14  
15  
16  
17  
18  
19  
20  
21  
22  
23  
24  
25  
26  
27  
28  
29  
30  
31  
32  
33  
34  
35  
36  
37  
38  
39  
40  
41  
42  
43  
44  
45  
46  
47  
48  
49  
50  
51  
52  
53  
54  
55  
56  
57  
58  
59  
60

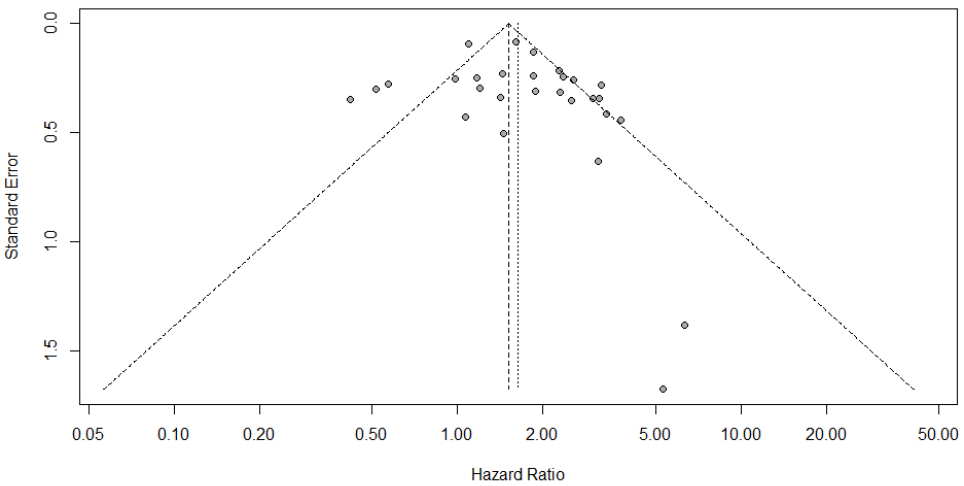

Fig 4. Funnel plot for the potential publication bias

Fig 4. Funnel plot for the potential publication bias

257x148mm (96 x 96 DPI)

**Supplement table 1.** LKB1 expression and clinicopathological characteristics.

| Study                           | LKB1 expression                  | Age |     | Sex  |        | Tumor differentiation |      | Tumor size |       | Lymph node metastasis |     | TNM stage |        |
|---------------------------------|----------------------------------|-----|-----|------|--------|-----------------------|------|------------|-------|-----------------------|-----|-----------|--------|
|                                 |                                  | ≥60 | <60 | Male | Female | Poor                  | Well | T3-T4      | T1-T2 | Yes                   | No  | III-IV    | I - II |
| Huang YH                        | Low                              | -   | -   | 26   | 5      | 23                    | 8    | 15         | 16    | -                     | -   | 19        | 12     |
|                                 | High                             | -   | -   | 31   | 8      | 17                    | 22   | 20         | 19    | -                     | -   | 27        | 12     |
| He TY                           | Low                              | -   | -   | -    | -      | -                     | -    | -          | -     | -                     | -   | -         | -      |
|                                 | High                             | -   | -   | -    | -      | -                     | -    | -          | -     | -                     | -   | -         | -      |
| Bouchekio<br>ua-Bouzag<br>hou K | Low<br>(cytoplasmic<br>staining) | -   | -   | -    | -      | 69                    | 25   | 26         | 68    | 50                    | 44  | -         | -      |
|                                 | High                             | -   | -   | -    | -      | 54                    | 6    | 18         | 42    | 38                    | 22  | -         | -      |
|                                 | Low(nuclear<br>staining)         | -   | -   | -    | -      | 83                    | 19   | 34         | 68    | 63                    | 39  | -         | -      |
| ShenZ                           | Low                              | -   | -   | -    | -      | 35                    | 3    | 13         | 25    | -                     | -   | -         | -      |
|                                 | High                             | -   | -   | -    | -      | 69                    | 14   | 11         | 73    | -                     | -   | -         | -      |
| Tsai LH                         | Low                              | -   | -   | 25   | 19     | -                     | -    | 9          | 35    | 35                    | 9   | 28        | 16     |
|                                 | High                             | -   | -   | 41   | 30     | -                     | -    | 9          | 62    | 31                    | 40  | 24        | 47     |
| Jiang LL                        | Low                              | 16  | 17  | 17   | 16     | 23                    | 10   | -          | -     | 18                    | 15  | 12        | 21     |
|                                 | High                             | 49  | 60  | 65   | 44     | 34                    | 75   | -          | -     | 44                    | 65  | 23        | 86     |
| Yang JY                         | Low                              | -   | -   | 16   | 20     | 32                    | 4    | 35         | 1     | 17                    | 19  | 16        | 20     |
|                                 | High                             | -   | -   | 101  | 68     | 159                   | 10   | 132        | 37    | 45                    | 124 | 31        | 138    |
| Calles A                        | Low                              | -   | -   | 14   | 28     | -                     | -    | -          | -     | -                     | -   | -         | -      |
|                                 | High                             | -   | -   | 25   | 59     | -                     | -    | -          | -     | -                     | -   | -         | -      |
| Wang JH                         | Low                              | -   | -   | 122  | 65     | 162                   | 25   | 112        | 100   | 76                    | 111 | 117       | 70     |
|                                 | High                             | -   | -   | 93   | 46     | 90                    | 49   | 63         | 51    | 42                    | 97  | 56        | 83     |
| Morton JP                       | Low                              | -   | -   | -    | -      | -                     | -    | -          | -     | -                     | -   | -         | -      |
|                                 | High                             | -   | -   | -    | -      | -                     | -    | -          | -     | -                     | -   | -         | -      |
| Ding XM                         | Low                              | 12  | 12  | 13   | 11     | -                     | -    | 9          | 15    | 3                     | 21  | 22        | 2      |
|                                 | High                             | 21  | 17  | 14   | 24     | -                     | -    | 7          | 31    | 8                     | 20  | 15        | 23     |
| Yang XW                         | Low                              | 52  | 24  | 60   | 16     | 62                    | 14   | 57         | 19    | 59                    | 17  | 48        | 19     |
|                                 | High                             | 16  | 8   | 20   | 4      | 20                    | 4    | 13         | 11    | 7                     | 17  | 6         | 11     |
| Wu CC                           | Low                              | 17  | 24  | 32   | 9      | -                     | -    | -          | -     | -                     | -   | 26        | 15     |
|                                 | High                             | 25  | 27  | 45   | 7      | -                     | -    | -          | -     | -                     | -   | 32        | 20     |
| Yin M                           | Low                              | 43  | 35  | 54   | 24     | 57                    | 21   | 71         | 7     | 56                    | 22  | 68        | 20     |
|                                 | High                             | 19  | 13  | 23   | 9      | 12                    | 20   | 24         | 8     | 11                    | 21  | 12        | 20     |

|    |          |      |    |    |    |    |     |    |    |     |     |     |    |     |
|----|----------|------|----|----|----|----|-----|----|----|-----|-----|-----|----|-----|
| 1  |          |      |    |    |    |    |     |    |    |     |     |     |    |     |
| 2  |          |      |    |    |    |    |     |    |    |     |     |     |    |     |
| 3  |          |      |    |    |    |    |     |    |    |     |     |     |    |     |
| 4  | Huang Y  | Low  | 51 | 17 | -  | -  | -   | -  | 65 | 26  | 64  | 27  | 80 | 11  |
| 5  |          | High | 40 | 7  | -  | -  | -   | -  | 16 | 8   | 8   | 16  | 10 | 14  |
| 6  | Ma LG    | Low  | 51 | 22 | 60 | 13 | 60  | 13 | 48 | 25  | 24  | 49  | 31 | 42  |
| 7  |          | high | 36 | 11 | 36 | 11 | 24  | 23 | 24 | 23  | 5   | 42  | 6  | 41  |
| 8  | Chen IC  | low  | -  | -  | -  | -  | 126 | 25 | 16 | 145 | 67  | 91  | 23 | 138 |
| 9  |          | High | -  | -  | -  | -  | 311 | 81 | 34 | 372 | 152 | 253 | 57 | 351 |
| 10 |          | Low  | -  | -  | -  | -  | 83  | 2  | 6  | 82  | 56  | 32  | 36 | 52  |
| 11 |          | High | -  | -  | -  | -  | 177 | 12 | 15 | 174 | 106 | 83  | 66 | 123 |
| 12 |          | Low  | -  | -  | -  | -  | 457 | 37 | 20 | 474 | 241 | 253 | 85 | 369 |
| 13 |          | High | -  | -  | -  | -  | 459 | 35 | 26 | 468 | 235 | 259 | 88 | 406 |
| 14 |          | Low  | -  | -  | -  | -  | 392 | 49 | 29 | 451 | 241 | 238 | 88 | 393 |
| 15 |          | High | -  | -  | -  | -  | 398 | 46 | 24 | 446 | 213 | 260 | 85 | 388 |
| 16 | Li DZ    | Low  | -  | -  | 26 | 12 | 6   | 32 | -  | -   | -   | -   | -  | -   |
| 17 |          | High | -  | -  | 16 | 17 | 1   | 32 | -  | -   | -   | -   | -  | -   |
| 18 | Huang YH | Low  | -  | -  | 56 | 36 | -   | -  | 52 | 40  | -   | -   | 77 | 15  |
| 19 |          | High | -  | -  | 54 | 34 | -   | -  | 20 | 68  | -   | -   | 43 | 55  |
| 20 | HamdyA.  | Low  | -  | -  | -  | -  | -   | -  | -  | -   | -   | -   | -  | -   |
| 21 | Azim     |      |    |    |    |    |     |    |    |     |     |     |    |     |
| 22 |          | High | -  | -  | -  | -  | -   | -  | -  | -   | -   | -   | -  | -   |
| 23 | Lu JL    | Low  | -  | -  | -  | -  | -   | -  | -  | -   | -   | -   | 47 | 31  |
| 24 |          | High | -  | -  | -  | -  | -   | -  | -  | -   | -   | -   | 11 | 20  |
| 25 | He SS    | Low  | -  | -  | -  | -  | -   | -  | -  | -   | -   | -   | -  | -   |
| 26 |          | High | -  | -  | -  | -  | -   | -  | -  | -   | -   | -   | -  | -   |
| 27 | Ma JJ    | Low  | 29 | 33 | 40 | 22 | 27  | 35 | 44 | 18  | 51  | 11  | 28 | 34  |
| 28 |          | High | 30 | 17 | 31 | 16 | 19  | 28 | 18 | 29  | 29  | 18  | 9  | 38  |
| 29 | Lee SW   | Low  | -  | -  | -  | -  | -   | -  | -  | -   | -   | -   | -  | -   |
| 30 |          | High | -  | -  | -  | -  | -   | -  | -  | -   | -   | -   | -  | -   |
| 31 | Sun JJ   | Low  | 60 | 47 | 79 | 28 | 78  | 29 | 73 | 34  | 60  | 47  | 55 | 52  |
| 32 |          | High | 28 | 20 | 42 | 6  | 38  | 10 | 22 | 26  | 16  | 32  | 8  | 40  |
| 33 |          |      |    |    |    |    |     |    |    |     |     |     |    |     |
| 34 |          |      |    |    |    |    |     |    |    |     |     |     |    |     |
| 35 |          |      |    |    |    |    |     |    |    |     |     |     |    |     |
| 36 |          |      |    |    |    |    |     |    |    |     |     |     |    |     |
| 37 |          |      |    |    |    |    |     |    |    |     |     |     |    |     |
| 38 |          |      |    |    |    |    |     |    |    |     |     |     |    |     |
| 39 |          |      |    |    |    |    |     |    |    |     |     |     |    |     |
| 40 |          |      |    |    |    |    |     |    |    |     |     |     |    |     |
| 41 |          |      |    |    |    |    |     |    |    |     |     |     |    |     |
| 42 |          |      |    |    |    |    |     |    |    |     |     |     |    |     |
| 43 |          |      |    |    |    |    |     |    |    |     |     |     |    |     |
| 44 |          |      |    |    |    |    |     |    |    |     |     |     |    |     |
| 45 |          |      |    |    |    |    |     |    |    |     |     |     |    |     |
| 46 |          |      |    |    |    |    |     |    |    |     |     |     |    |     |
| 47 |          |      |    |    |    |    |     |    |    |     |     |     |    |     |
| 48 |          |      |    |    |    |    |     |    |    |     |     |     |    |     |
| 49 |          |      |    |    |    |    |     |    |    |     |     |     |    |     |
| 50 |          |      |    |    |    |    |     |    |    |     |     |     |    |     |
| 51 |          |      |    |    |    |    |     |    |    |     |     |     |    |     |
| 52 |          |      |    |    |    |    |     |    |    |     |     |     |    |     |
| 53 |          |      |    |    |    |    |     |    |    |     |     |     |    |     |
| 54 |          |      |    |    |    |    |     |    |    |     |     |     |    |     |
| 55 |          |      |    |    |    |    |     |    |    |     |     |     |    |     |
| 56 |          |      |    |    |    |    |     |    |    |     |     |     |    |     |
| 57 |          |      |    |    |    |    |     |    |    |     |     |     |    |     |
| 58 |          |      |    |    |    |    |     |    |    |     |     |     |    |     |
| 59 |          |      |    |    |    |    |     |    |    |     |     |     |    |     |
| 60 |          |      |    |    |    |    |     |    |    |     |     |     |    |     |

**S2 Table. Newcastle-Ottawa Scale (NOS) for quality assessment in meta-analysis.****Selection**

(1) Representativeness of the exposed cohort

(a) Truly representative of the cancer patients in the community (1 star)

(b) Somewhat representative of the cancer patients in the community (1 star)

(c) Selected group of users (e.g., nurses, volunteers)

(d) No description of the derivation of the cohort

(2) Selection of the non-exposed cohort

(a) Drawn from the same community as the exposed cohort (1 star)

(b) Drawn from a different source

(c) No description of the derivation of the non-exposed cohort

(3) Ascertainment of exposure (proof of cancer and LKB1 measurement)

(a) Secure record (e.g., surgical records or pathological diagnosis) (1 star)

(b) Structured interview (1 star)

(c) Written self-report

(d) No description

(4) Demonstration that outcome of interest was not present at start of study

(a) Yes (1 star)

(b) No

**Comparability**

(1) Comparability of cohorts based on the design or analysis

(a) The age between exposed cohort and non-exposed cohort had no significant difference (1 star)

(b) The sex (or grade, stage, etc.) between exposed cohort and non-exposed cohort had no significant difference (1 star)

**Outcome**

(1) Assessment of outcome (death or recurrence)

(a) Independent blind assessment (1 star)

(b) Record linkage (1 star)

(c) Self-report

(d) No description

(2) Was follow-up long enough for outcomes to occur? (death or recurrence)

(a) Yes (at least 3 years) (1 star)

(b) No

(3) Adequacy of follow-up of cohorts

(a) Complete follow-up—all subjects accounted for (1 star)

(b) Subjects lost to follow-up unlikely to introduce bias—small number lost (less than 25%) or description provided of those lost (1 star)

(c) Follow-up rate less than 75% and no description of those lost

(d) No statement

Note: a maximum of one “star” for each item within the “Selection” and “Outcome” categories, maximum of two “stars” for “Comparability”.



**S3 Table. Quality assessment of the 25 included studies according to the NOS.**

| Study                        | Year | Country          | Type of cancer                        | Selection/4 | Comparability/2 | Outcome/3 | Total score |
|------------------------------|------|------------------|---------------------------------------|-------------|-----------------|-----------|-------------|
| Ding XM                      | 2005 | China            | Lung adenocarcinoma                   | 1+1+1+0=3   | 1+1=2           | 1+1+1=3   | 8           |
| Tsai LH                      | 2013 | China            | Lung adenocarcinomas                  | 1+1+1+0=3   | 1+1=2           | 1+1+0=2   | 7           |
| Jiang LL                     | 2014 | China            | Non-small cell lung cancer            | 1+1+1+0=3   | 1+1=2           | 1+1+0=2   | 7           |
| Calles A                     | 2015 | USA              | Lung adenocarcinoma                   | 1+1+1+0=3   | 1+1=2           | 1+1+0=2   | 7           |
| Shen Z                       | 2002 | China            | Breast carcinoma                      | 1+1+1+0=3   | 1+0=1           | 1+1+0=2   | 6           |
| Bouchekioua-B<br>ouzaghrou K | 2014 | France           | Breast cancer                         | 1+1+1+0=3   | 1+1=2           | 1+1+0=2   | 7           |
| Chen IC                      | 2016 | China            | Breast cancer                         | 1+1+1+0=3   | 1+0=1           | 1+1+0=2   | 6           |
|                              |      | UK and<br>Canada | Breast cancer                         | 1+1+1+0=3   | 0+0=0           | 1+1+0=2   | 5           |
| HamdyA.Azim                  | 2016 | Egypt            | Breast Cancer                         | 1+1+1+0=3   | 0+0=0           | 1+1+0=2   | 6           |
| Morton JP                    | 2010 | UK               | Pancreatic cancer                     | 1+1+1+0=3   | 0+0=0           | 1+1+1=3   | 6           |
| Yang JY                      | 2015 | China            | Pancreatic ductal<br>adenocarcinoma   | 1+1+1+0=3   | 1+1=2           | 1+1+0=2   | 7           |
| Li DZ                        | 2018 | China            | Pancreatic<br>neuroendocrine<br>tumor | 1+1+1+0=3   | 1+1=2           | 1+1+1=3   | 8           |
| Yang XW                      | 2012 | China            | Gastric Cancer                        | 1+1+1+0=3   | 1+1=2           | 1+1+0=2   | 7           |
| Huang Y                      | 2014 | China            | Gastric carcinoma                     | 1+1+1+0=3   | 1+0=1           | 1+1+0=2   | 6           |
| Ma LG                        | 2016 | China            | Gastric Cancer                        | 1+1+1+0=3   | 1+1=2           | 1+1+1=3   | 8           |
| Sun JJ                       | 2016 | China            | Gastric Cancer                        | 1+1+1+0=3   | 1+0=1           | 1+1+0=2   | 6           |
| Yin M                        | 2017 | China            | Gastric Cancer                        | 1+1+1+0=3   | 1+0=1           | 1+1+1=3   | 7           |
| Huang YH                     | 2013 | China            | Hepatocellular carcinoma              | 1+1+1+0=3   | 1+1=2           | 1+1+0=2   | 7           |
| Lee SW                       | 2015 | China            | Hepatocellular carcinoma              | 1+1+1+0=3   | 1+1=2           | 1+1+0=2   | 7           |
| Wu CC                        | 2018 | China            | Hepatocellular carcinoma              | 1+1+1+0=3   | 1+0=1           | 1+1+1=3   | 7           |

1  
2  
3  
4  
5  
6  
7  
8  
9  
10  
11  
12  
13  
14  
15  
16  
17  
18  
19  
20  
21  
22  
23  
24  
25  
26  
27  
28  
29  
30  
31  
32  
33  
34  
35  
36  
37  
38  
39  
40  
41  
42  
43  
44  
45  
46  
47  
48  
49  
50  
51  
52  
53  
54  
55  
56  
57  
58  
59  
60

---

|          |      |       |                                      |           |       |         |   |
|----------|------|-------|--------------------------------------|-----------|-------|---------|---|
| Wang JH  | 2015 | China | Intrahepatic<br>cholangiocarcinoma   | 1+1+1+0=3 | 1+1=2 | 1+1+1=3 | 8 |
| Ma JJ    | 2014 | China | Esophagus squamous<br>cancer         | 1+1+1+0=3 | 1+1=2 | 1+1+1=3 | 8 |
| He TY    | 2014 | China | Colorectal cancer                    | 1+1+1+0=3 | 0+0=0 | 1+1+0=2 | 5 |
| Lu JL    | 2015 | China | Prostate Cancer                      | 1+1+1+0=3 | 1+0=1 | 1+1+1=3 | 7 |
| Huang JH | 2017 | China | Glioma                               | 1+1+1+0=3 | 1+1=2 | 1+1+1=3 | 8 |
| He SS    | 2017 | China | Laryngeal squamous cell<br>carcinoma | 1+1+1+0=3 | 1+1=2 | 1+1+1=3 | 8 |

---

For peer review only

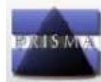

# PRISMA 2009 Checklist

| Section/topic                      | #  | Checklist item                                                                                                                                                                                                                                                                                              | Reported on page # |
|------------------------------------|----|-------------------------------------------------------------------------------------------------------------------------------------------------------------------------------------------------------------------------------------------------------------------------------------------------------------|--------------------|
| <b>TITLE</b>                       |    |                                                                                                                                                                                                                                                                                                             |                    |
| Title                              | 1  | Identify the report as a meta-analysis.                                                                                                                                                                                                                                                                     | 1                  |
| <b>ABSTRACT</b>                    |    |                                                                                                                                                                                                                                                                                                             |                    |
| Structured summary                 | 2  | Provide a structured summary including, as applicable: background; objectives; data sources; study eligibility criteria, participants, and interventions; study appraisal and synthesis methods; results; limitations; conclusions and implications of key findings; systematic review registration number. | 2                  |
| <b>INTRODUCTION</b>                |    |                                                                                                                                                                                                                                                                                                             |                    |
| Rationale                          | 3  | Describe the rationale for the review in the context of what is already known.                                                                                                                                                                                                                              | 3                  |
| Objectives                         | 4  | Provide an explicit statement of questions being addressed with reference to participants, interventions, comparisons, outcomes, and study design (PICOS).                                                                                                                                                  | 4                  |
| <b>METHODS</b>                     |    |                                                                                                                                                                                                                                                                                                             |                    |
| Protocol and registration          | 5  | Indicate if a review protocol exists, if and where it can be accessed (e.g., Web address), and, if available, provide registration information including registration number.                                                                                                                               | n/a                |
| Eligibility criteria               | 6  | Specify study characteristics (e.g., PICOS, length of follow-up) and report characteristics (e.g., years considered, language, publication status) used as criteria for eligibility, giving rationale.                                                                                                      | 4                  |
| Information sources                | 7  | Describe all information sources (e.g., databases with dates of coverage, contact with study authors to identify additional studies) in the search and date last searched.                                                                                                                                  | 4                  |
| Search                             | 8  | Present full electronic search strategy for at least one database, including any limits used, such that it could be repeated.                                                                                                                                                                               | 4                  |
| Study selection                    | 9  | State the process for selecting studies (i.e., screening, eligibility, included in systematic review, and, if applicable, included in the meta-analysis).                                                                                                                                                   | 4                  |
| Data collection process            | 10 | Describe method of data extraction from reports (e.g., piloted forms, independently, in duplicate) and any processes for obtaining and confirming data from investigators.                                                                                                                                  | 4                  |
| Data items                         | 11 | List and define all variables for which data were sought (e.g., PICOS, funding sources) and any assumptions and simplifications made.                                                                                                                                                                       | 4                  |
| Risk of bias in individual studies | 12 | Describe methods used for assessing risk of bias of individual studies (including specification of whether this was done at the study or outcome level), and how this information is to be used in any data synthesis.                                                                                      | 5                  |
| Summary measures                   | 13 | State the principal summary measures (e.g., risk ratio, difference in means).                                                                                                                                                                                                                               | 5                  |
| Synthesis of results               | 14 | Describe the methods of handling data and combining results of studies, if done, including measures of consistency (e.g., I <sup>2</sup> ) for each meta-analysis.                                                                                                                                          | 5-6                |



# PRISMA 2009 Checklist

Page 1 of 2

| Section/topic                 | #  | Checklist item                                                                                                                                                                                           | Reported on page # |
|-------------------------------|----|----------------------------------------------------------------------------------------------------------------------------------------------------------------------------------------------------------|--------------------|
| Risk of bias across studies   | 15 | Specify any assessment of risk of bias that may affect the cumulative evidence (e.g., publication bias, selective reporting within studies).                                                             | 6                  |
| Additional analyses           | 16 | Describe methods of additional analyses (e.g., sensitivity or subgroup analyses, meta-regression), if done, indicating which were pre-specified.                                                         | 6                  |
| <b>RESULTS</b>                |    |                                                                                                                                                                                                          |                    |
| Study selection               | 17 | Give numbers of studies screened, assessed for eligibility, and included in the review, with reasons for exclusions at each stage, ideally with a flow diagram.                                          | 6                  |
| Study characteristics         | 18 | For each study, present characteristics for which data were extracted (e.g., study size, PICOS, follow-up period) and provide the citations.                                                             | 6                  |
| Risk of bias within studies   | 19 | Present data on risk of bias of each study and, if available, any outcome level assessment (see item 12).                                                                                                | 7                  |
| Results of individual studies | 20 | For all outcomes considered (benefits or harms), present, for each study: (a) simple summary data for each intervention group (b) effect estimates and confidence intervals, ideally with a forest plot. | 7                  |
| Synthesis of results          | 21 | Present results of each meta-analysis done, including confidence intervals and measures of consistency.                                                                                                  | 7                  |
| Risk of bias across studies   | 22 | Present results of any assessment of risk of bias across studies (see Item 15).                                                                                                                          | 8                  |
| Additional analysis           | 23 | Give results of additional analyses, if done (e.g., sensitivity or subgroup analyses, meta-regression [see Item 16]).                                                                                    | 8                  |
| <b>DISCUSSION</b>             |    |                                                                                                                                                                                                          |                    |
| Summary of evidence           | 24 | Summarize the main findings including the strength of evidence for each main outcome; consider their relevance to key groups (e.g., healthcare providers, users, and policy makers).                     | 9                  |
| Limitations                   | 25 | Discuss limitations at study and outcome level (e.g., risk of bias), and at review-level (e.g., incomplete retrieval of identified research, reporting bias).                                            | 10                 |
| Conclusions                   | 26 | Provide a general interpretation of the results in the context of other evidence, and implications for future research.                                                                                  | 11                 |
| <b>FUNDING</b>                |    |                                                                                                                                                                                                          |                    |
| Funding                       | 27 | Describe sources of funding for the systematic review and other support (e.g., supply of data); role of funders for the systematic review.                                                               | 1                  |

From: Moher D, Liberati A, Tetzlaff J, Altman DG, The PRISMA Group (2009). Preferred Reporting Items for Systematic Reviews and Meta-Analyses: The PRISMA Statement. PLoS Med 6(6): e1000097. doi:10.1371/journal.pmed1000097

For more information, visit: [www.prisma-statement.org](http://www.prisma-statement.org).

Page 2 of 2

For peer review only - <http://bmjopen.bmj.com/site/about/guidelines.xhtml>
