# Supplementary material for: Association between LKB1 expression and prognosis of patients with solid tumours: an updated systematic review and meta-analysis
Source: PubMed Central journal article supplement — BMJ Open. 2019 Aug 5;9(8):e027185. doi: 10.1136/bmjopen-2018-027185 (PMC6687027; doi:10.1136/bmjopen-2018-027185), 2019-08-05
Supplement: bmjopen-2018-027185supp001.pdf [file bmjopen-2018-027185supp001.pdf]

**Supplement table 1.** LKB1 expression and clinicopathological characteristics.

| Study                           | LKB1 expression                  | Age |     | Sex  |        | Tumor differentiation |      | Tumor size |       | Lymph node metastasis |     | TNM stage |        |
|---------------------------------|----------------------------------|-----|-----|------|--------|-----------------------|------|------------|-------|-----------------------|-----|-----------|--------|
|                                 |                                  | ≥60 | <60 | Male | Female | Poor                  | Well | T3-T4      | T1-T2 | Yes                   | No  | III-IV    | I - II |
| Huang YH                        | Low                              | -   | -   | 26   | 5      | 23                    | 8    | 15         | 16    | -                     | -   | 19        | 12     |
|                                 | High                             | -   | -   | 31   | 8      | 17                    | 22   | 20         | 19    | -                     | -   | 27        | 12     |
| He TY                           | Low                              | -   | -   | -    | -      | -                     | -    | -          | -     | -                     | -   | -         | -      |
|                                 | High                             | -   | -   | -    | -      | -                     | -    | -          | -     | -                     | -   | -         | -      |
| Bouchekio<br>ua-Bouzag<br>hou K | Low<br>(cytoplasmic<br>staining) | -   | -   | -    | -      | 69                    | 25   | 26         | 68    | 50                    | 44  | -         | -      |
|                                 | High                             | -   | -   | -    | -      | 54                    | 6    | 18         | 42    | 38                    | 22  | -         | -      |
|                                 | Low(nuclear<br>staining)         | -   | -   | -    | -      | 83                    | 19   | 34         | 68    | 63                    | 39  | -         | -      |
|                                 | High                             | -   | -   | -    | -      | 40                    | 12   | 10         | 42    | 25                    | 27  | -         | -      |
| ShenZ                           | Low                              | -   | -   | -    | -      | 35                    | 3    | 13         | 25    | -                     | -   | -         | -      |
|                                 | High                             | -   | -   | -    | -      | 69                    | 14   | 11         | 73    | -                     | -   | -         | -      |
| Tsai LH                         | Low                              | -   | -   | 25   | 19     | -                     | -    | 9          | 35    | 35                    | 9   | 28        | 16     |
|                                 | High                             | -   | -   | 41   | 30     | -                     | -    | 9          | 62    | 31                    | 40  | 24        | 47     |
| Jiang LL                        | Low                              | 16  | 17  | 17   | 16     | 23                    | 10   | -          | -     | 18                    | 15  | 12        | 21     |
|                                 | High                             | 49  | 60  | 65   | 44     | 34                    | 75   | -          | -     | 44                    | 65  | 23        | 86     |
| Yang JY                         | Low                              | -   | -   | 16   | 20     | 32                    | 4    | 35         | 1     | 17                    | 19  | 16        | 20     |
|                                 | High                             | -   | -   | 101  | 68     | 159                   | 10   | 132        | 37    | 45                    | 124 | 31        | 138    |
| Calles A                        | Low                              | -   | -   | 14   | 28     | -                     | -    | -          | -     | -                     | -   | -         | -      |
|                                 | High                             | -   | -   | 25   | 59     | -                     | -    | -          | -     | -                     | -   | -         | -      |
| Wang JH                         | Low                              | -   | -   | 122  | 65     | 162                   | 25   | 112        | 100   | 76                    | 111 | 117       | 70     |
|                                 | High                             | -   | -   | 93   | 46     | 90                    | 49   | 63         | 51    | 42                    | 97  | 56        | 83     |
| Morton JP                       | Low                              | -   | -   | -    | -      | -                     | -    | -          | -     | -                     | -   | -         | -      |
|                                 | High                             | -   | -   | -    | -      | -                     | -    | -          | -     | -                     | -   | -         | -      |
| Ding XM                         | Low                              | 12  | 12  | 13   | 11     | -                     | -    | 9          | 15    | 3                     | 21  | 22        | 2      |
|                                 | High                             | 21  | 17  | 14   | 24     | -                     | -    | 7          | 31    | 8                     | 20  | 15        | 23     |
| Yang XW                         | Low                              | 52  | 24  | 60   | 16     | 62                    | 14   | 57         | 19    | 59                    | 17  | 48        | 19     |
|                                 | High                             | 16  | 8   | 20   | 4      | 20                    | 4    | 13         | 11    | 7                     | 17  | 6         | 11     |
| Wu CC                           | Low                              | 17  | 24  | 32   | 9      | -                     | -    | -          | -     | -                     | -   | 26        | 15     |
|                                 | High                             | 25  | 27  | 45   | 7      | -                     | -    | -          | -     | -                     | -   | 32        | 20     |
| Yin M                           | Low                              | 43  | 35  | 54   | 24     | 57                    | 21   | 71         | 7     | 56                    | 22  | 68        | 20     |
|                                 | High                             | 19  | 13  | 23   | 9      | 12                    | 20   | 24         | 8     | 11                    | 21  | 12        | 20     |

|                 |      |    |    |    |    |     |    |    |     |     |     |    |     |
|-----------------|------|----|----|----|----|-----|----|----|-----|-----|-----|----|-----|
| Huang Y         | Low  | 51 | 17 | -  | -  | -   | -  | 65 | 26  | 64  | 27  | 80 | 11  |
|                 | High | 40 | 7  | -  | -  | -   | -  | 16 | 8   | 8   | 16  | 10 | 14  |
| Ma LG           | Low  | 51 | 22 | 60 | 13 | 60  | 13 | 48 | 25  | 24  | 49  | 31 | 42  |
|                 | high | 36 | 11 | 36 | 11 | 24  | 23 | 24 | 23  | 5   | 42  | 6  | 41  |
| Chen IC         | low  | -  | -  | -  | -  | 126 | 25 | 16 | 145 | 67  | 91  | 23 | 138 |
|                 | High | -  | -  | -  | -  | 311 | 81 | 34 | 372 | 152 | 253 | 57 | 351 |
|                 | Low  | -  | -  | -  | -  | 83  | 2  | 6  | 82  | 56  | 32  | 36 | 52  |
|                 | High | -  | -  | -  | -  | 177 | 12 | 15 | 174 | 106 | 83  | 66 | 123 |
|                 | Low  | -  | -  | -  | -  | 457 | 37 | 20 | 474 | 241 | 253 | 85 | 369 |
|                 | High | -  | -  | -  | -  | 459 | 35 | 26 | 468 | 235 | 259 | 88 | 406 |
|                 | Low  | -  | -  | -  | -  | 392 | 49 | 29 | 451 | 241 | 238 | 88 | 393 |
|                 | High | -  | -  | -  | -  | 398 | 46 | 24 | 446 | 213 | 260 | 85 | 388 |
| Li DZ           | Low  | -  | -  | 26 | 12 | 6   | 32 | -  | -   | -   | -   | -  | -   |
|                 | High | -  | -  | 16 | 17 | 1   | 32 | -  | -   | -   | -   | -  | -   |
| Huang YH        | Low  | -  | -  | 56 | 36 | -   | -  | 52 | 40  | -   | -   | 77 | 15  |
|                 | High | -  | -  | 54 | 34 | -   | -  | 20 | 68  | -   | -   | 43 | 55  |
| HamdyA.<br>Azim | Low  | -  | -  | -  | -  | -   | -  | -  | -   | -   | -   | -  | -   |
|                 | High | -  | -  | -  | -  | -   | -  | -  | -   | -   | -   | -  | -   |
| Lu JL           | Low  | -  | -  | -  | -  | -   | -  | -  | -   | -   | -   | 47 | 31  |
|                 | High | -  | -  | -  | -  | -   | -  | -  | -   | -   | -   | 11 | 20  |
| He SS           | Low  | -  | -  | -  | -  | -   | -  | -  | -   | -   | -   | -  | -   |
|                 | High | -  | -  | -  | -  | -   | -  | -  | -   | -   | -   | -  | -   |
| Ma JJ           | Low  | 29 | 33 | 40 | 22 | 27  | 35 | 44 | 18  | 51  | 11  | 28 | 34  |
|                 | High | 30 | 17 | 31 | 16 | 19  | 28 | 18 | 29  | 29  | 18  | 9  | 38  |
| Lee SW          | Low  | -  | -  | -  | -  | -   | -  | -  | -   | -   | -   | -  | -   |
|                 | High | -  | -  | -  | -  | -   | -  | -  | -   | -   | -   | -  | -   |
| Sun JJ          | Low  | 60 | 47 | 79 | 28 | 78  | 29 | 73 | 34  | 60  | 47  | 55 | 52  |
|                 | High | 28 | 20 | 42 | 6  | 38  | 10 | 22 | 26  | 16  | 32  | 8  | 40  |

---
