# Supplementary material for: Association between LKB1 expression and prognosis of patients with solid tumours: an updated systematic review and meta-analysis
Source: PubMed Central journal article supplement — BMJ Open. 2019 Aug 5;9(8):e027185. doi: 10.1136/bmjopen-2018-027185 (PMC6687027; doi:10.1136/bmjopen-2018-027185), 2019-08-05
Supplement: bmjopen-2018-027185supp003.pdf [file bmjopen-2018-027185supp003.pdf]

**S3 Table. Quality assessment of the 25 included studies according to the NOS.**

| Study                       | Year | Country          | Type of cancer                        | Selection/4 | Comparability/2 | Outcome/3 | Total score |
|-----------------------------|------|------------------|---------------------------------------|-------------|-----------------|-----------|-------------|
| Ding XM                     | 2005 | China            | Lung adenocarcinoma                   | 1+1+1+0=3   | 1+1=2           | 1+1+1=3   | 8           |
| Tsai LH                     | 2013 | China            | Lung adenocarcinomas                  | 1+1+1+0=3   | 1+1=2           | 1+1+0=2   | 7           |
| Jiang LL                    | 2014 | China            | Non-small cell lung cancer            | 1+1+1+0=3   | 1+1=2           | 1+1+0=2   | 7           |
| Calles A                    | 2015 | USA              | Lung adenocarcinoma                   | 1+1+1+0=3   | 1+1=2           | 1+1+0=2   | 7           |
| Shen Z                      | 2002 | China            | Breast carcinoma                      | 1+1+1+0=3   | 1+0=1           | 1+1+0=2   | 6           |
| Bouchekioua-B<br>ouzaghou K | 2014 | France           | Breast cancer                         | 1+1+1+0=3   | 1+1=2           | 1+1+0=2   | 7           |
| Chen IC                     | 2016 | China            | Breast cancer                         | 1+1+1+0=3   | 1+0=1           | 1+1+0=2   | 6           |
|                             |      | UK and<br>Canada | Breast cancer                         | 1+1+1+0=3   | 0+0=0           | 1+1+0=2   | 5           |
| HamdyA.Azim                 | 2016 | Egypt            | Breast Cancer                         | 1+1+1+0=3   | 0+0=0           | 1+1+0=2   | 6           |
| Morton JP                   | 2010 | UK               | Pancreatic cancer                     | 1+1+1+0=3   | 0+0=0           | 1+1+1=3   | 6           |
| Yang JY                     | 2015 | China            | Pancreatic ductal<br>adenocarcinoma   | 1+1+1+0=3   | 1+1=2           | 1+1+0=2   | 7           |
| Li DZ                       | 2018 | China            | Pancreatic<br>neuroendocrine<br>tumor | 1+1+1+0=3   | 1+1=2           | 1+1+1=3   | 8           |
| Yang XW                     | 2012 | China            | Gastric Cancer                        | 1+1+1+0=3   | 1+1=2           | 1+1+0=2   | 7           |
| Huang Y                     | 2014 | China            | Gastric carcinoma                     | 1+1+1+0=3   | 1+0=1           | 1+1+0=2   | 6           |
| Ma LG                       | 2016 | China            | Gastric Cancer                        | 1+1+1+0=3   | 1+1=2           | 1+1+1=3   | 8           |
| Sun JJ                      | 2016 | China            | Gastric Cancer                        | 1+1+1+0=3   | 1+0=1           | 1+1+0=2   | 6           |
| Yin M                       | 2017 | China            | Gastric Cancer                        | 1+1+1+0=3   | 1+0=1           | 1+1+1=3   | 7           |
| Huang YH                    | 2013 | China            | Hepatocellular carcinoma              | 1+1+1+0=3   | 1+1=2           | 1+1+0=2   | 7           |
| Lee SW                      | 2015 | China            | Hepatocellular carcinoma              | 1+1+1+0=3   | 1+1=2           | 1+1+0=2   | 7           |
| Wu CC                       | 2018 | China            | Hepatocellular carcinoma              | 1+1+1+0=3   | 1+0=1           | 1+1+1=3   | 7           |

---

|          |      |       |                                      |           |       |         |   |
|----------|------|-------|--------------------------------------|-----------|-------|---------|---|
| Wang JH  | 2015 | China | Intrahepatic<br>cholangiocarcinoma   | 1+1+1+0=3 | 1+1=2 | 1+1+1=3 | 8 |
| Ma JJ    | 2014 | China | Esophagus squamous<br>cancer         | 1+1+1+0=3 | 1+1=2 | 1+1+1=3 | 8 |
| He TY    | 2014 | China | Colorectal cancer                    | 1+1+1+0=3 | 0+0=0 | 1+1+0=2 | 5 |
| Lu JL    | 2015 | China | Prostate Cancer                      | 1+1+1+0=3 | 1+0=1 | 1+1+1=3 | 7 |
| Huang JH | 2017 | China | Glioma                               | 1+1+1+0=3 | 1+1=2 | 1+1+1=3 | 8 |
| He SS    | 2017 | China | Laryngeal squamous cell<br>carcinoma | 1+1+1+0=3 | 1+1=2 | 1+1+1=3 | 8 |

---
